# Supplementary material for: Tracking the Antibody Immunome in Sporadic Colorectal Cancer by Using Antigen Self-Assembled Protein Arrays
Source: MDPI journal article supplement (doi:10.3390/cancers13112718), 2021-05-31
Supplement: s1 [file s1]

# Supplementary Material: Tracking the Antibody Immune in Sporadic Colorectal Cancer by Using Antigen Self-Assembled Protein Arrays

María González-González, José María Sayagués, Luis Muñoz-Bellvís, Carlos Eduardo Pedreira, Marcello L.R. de Campos, Jacinto García, José Antonio Alcázar, Patrick F. Braz, Breno L. Galves, Luis Miguel González, Oscar Bengoechea, María del Mar Abad, Juan Jesús Cruz, Lorena Bellido, Emilio Fonseca, Paula Díez, Pablo Juanes-Velasco, Alicia Landeira-Viñuela, Quentin Lecrevisse, Enrique Montalvillo, Rafael Góngora, Oscar Blanco, José Manuel Sanchez-Santos, Joshua LaBaer, Alberto Orfao and Manuel Fuentes

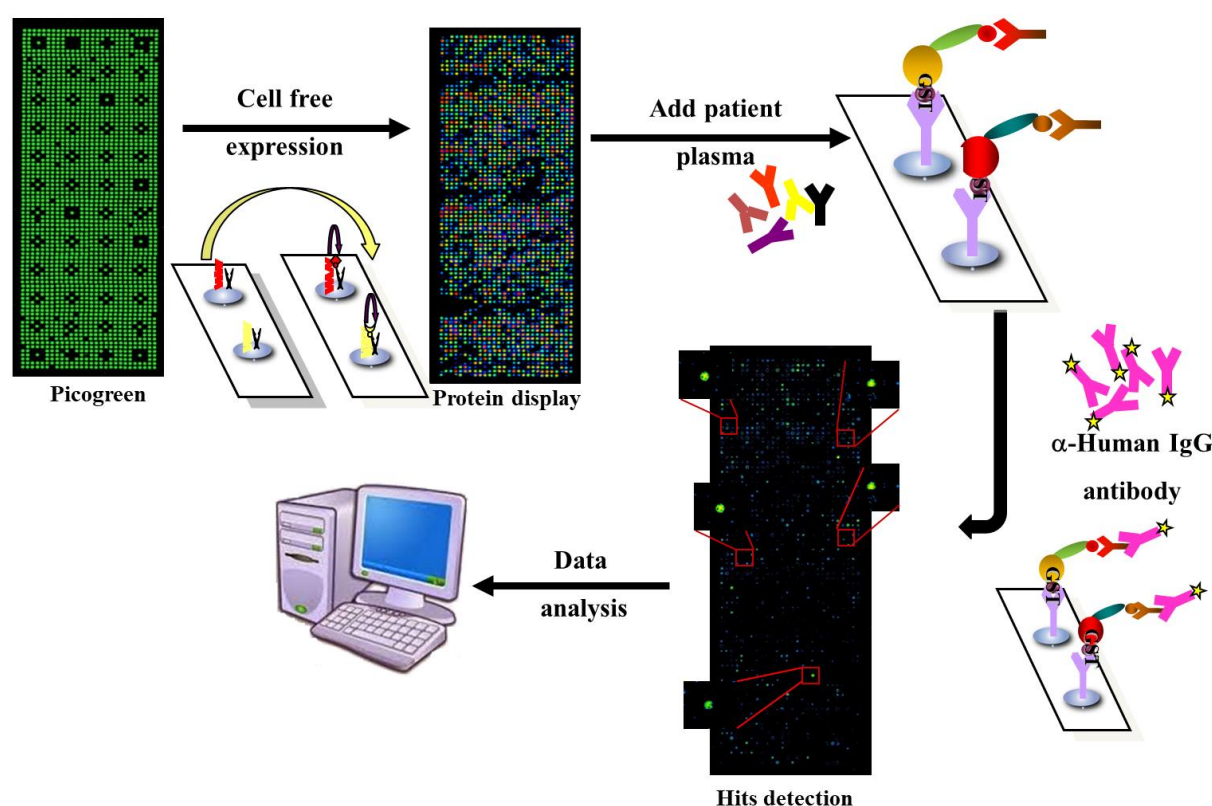

**Figure S1.** Schematic description of experimental workflow of serum screening.

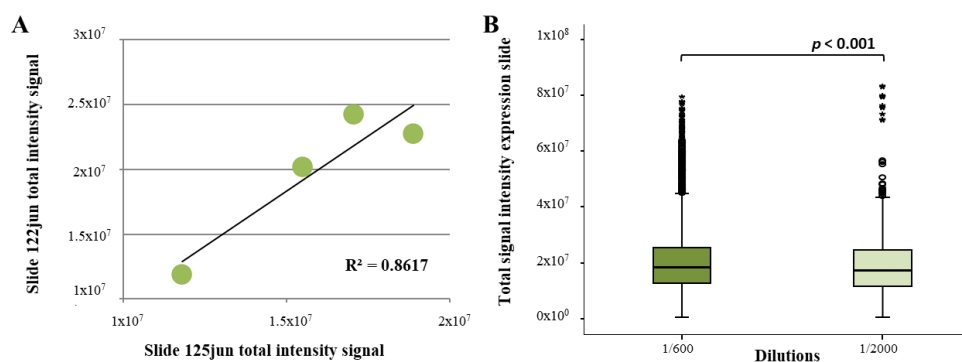

Figure S2. Reproducibility NAPPArray performance.

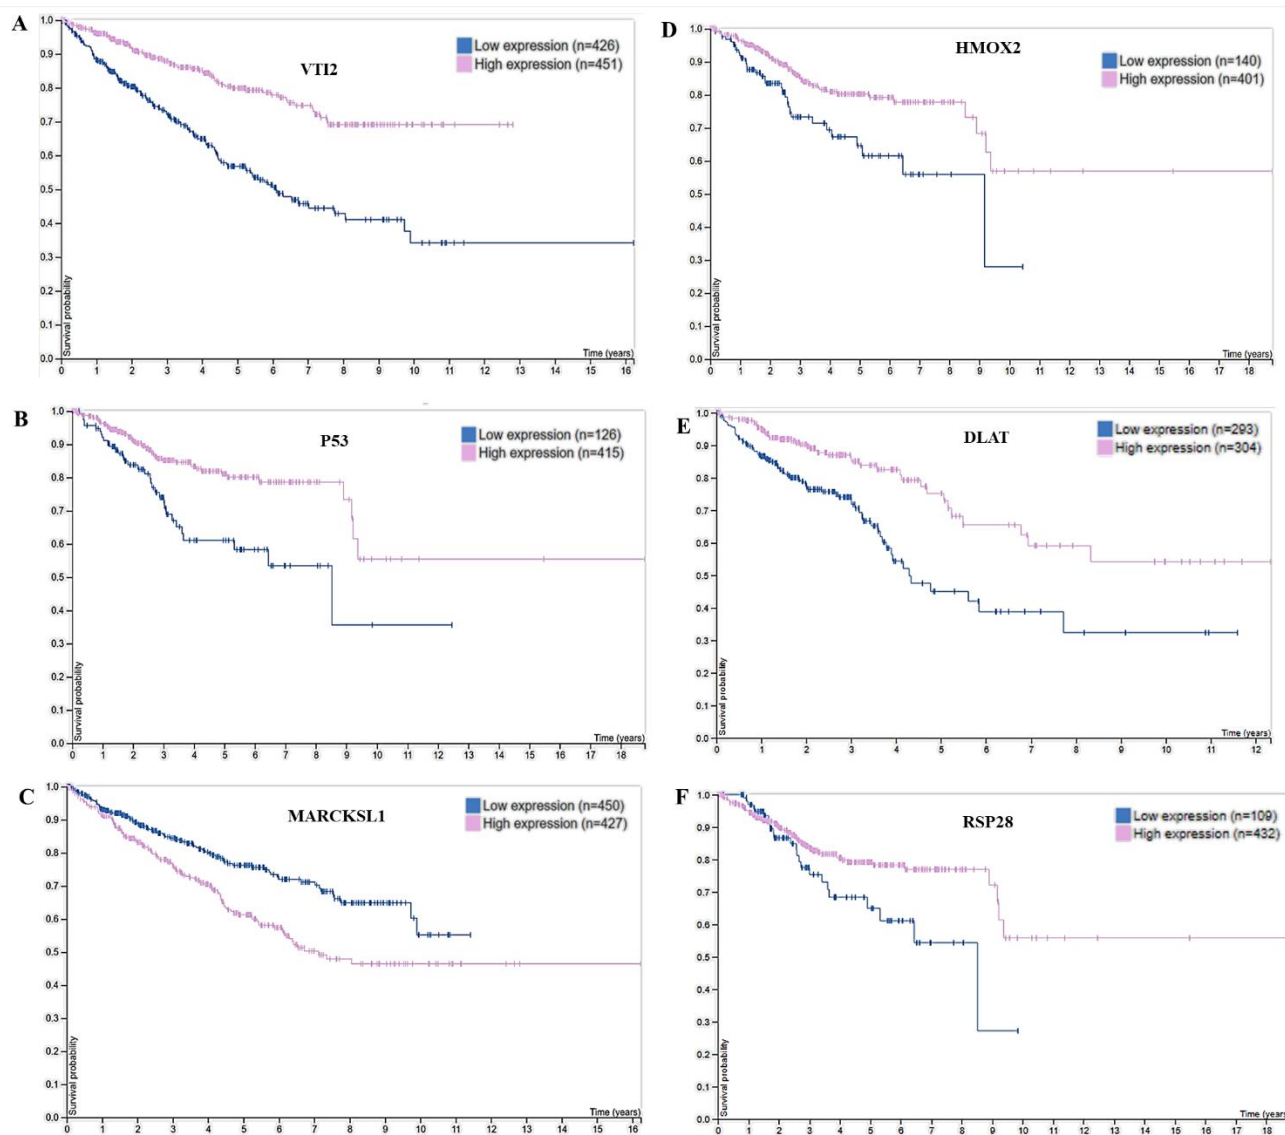

Figure S3. The Human Protein Atlas [28] showed that VTI2 (A), p53 (B), MARCKSL1 (C), HMOX2 (D), DLAT (E), RSP28 (F) have been described as a CRC prognosis biomarkers.

Table S1. List of tumoral antigen human proteins included in NAPPA

| Clone name | Start Position | Stop Position | Chromosomal Localization | Description                                                   |
|------------|----------------|---------------|--------------------------|---------------------------------------------------------------|
| 76P        | 43661419       | 43699293      | 15q15.3                  | Gamma-tubulin complex component 4                             |
| A4GALT     | 43088127       | 43117304      | 22q13.2                  | Lactosylceramide 4-alpha-galactosyltransferase                |
| AARS       | 70286198       | 70323446      | 16q22.1                  | Alanine--tRNA ligase, cytoplasmic                             |
| AATF       | 35306175       | 35414171      | 17q12                    | Protein AATF                                                  |
| ABAT       | 8768422        | 8878432       | 16p13.2                  | 4-aminobutyrate aminotransferase, mitochondrial               |
| ABCD4      | 74752126       | 74769759      | 14q24.3                  | ATP-binding cassette sub-family D member 4                    |
| ABCF1      | 30539153       | 30564956      | 6p21.33                  | ATP-binding cassette sub-family F member 1                    |
| ABCF2      | 150904923      | 150924316     | 7q36.1                   | ATP-binding cassette sub-family F member 2                    |
| ABCG2      | 89011416       | 89152474      | 4q22.1                   | ATP-binding cassette sub-family G member 2                    |
| ABHD11     | 73150424       | 73153197      | 7q11.23                  | Alpha/beta hydrolase domain-containing protein 11             |
| ABHD5      | 43731605       | 43775863      | 3p21.33                  | 1-acylglycerol-3-phosphate O-acyltransferase<br>ABHD5         |
| ACAA2      | 47309869       | 47340330      | 18q21.1                  | 3-ketoacyl-CoA thiolase, mitochondrial                        |
| ACAD8      | 134123389      | 134135749     | 11q25                    | Isobutyryl-CoA dehydrogenase, mitochondrial                   |
| ACAD9      | 128598439      | 128634910     | 3q21.3                   | Acyl-CoA dehydrogenase family member 9, mitochondrial         |
| ACADM      | 76190036       | 76253260      | 1p31.1                   | Medium-chain specific acyl-CoA dehydrogenase, mitochondrial   |
| ACO2       | 41865129       | 41924993      | 22q13.2                  | Aconitate hydratase, mitochondrial                            |
| ACPP       | 132036211      | 132087142     | 3q22.1                   | Prostatic acid phosphatase                                    |
| ACSL5      | 114133776      | 114188138     | 10q25.2                  | Long-chain-fatty-acid--CoA ligase 5                           |
| ACTA1      | 229566992      | 229569845     | 1q42.13                  | Actin, alpha skeletal muscle                                  |
| ACTG2      | 74119441       | 74146992      | 2p13.1                   | Actin, gamma-enteric smooth muscle                            |
| ACTN1      | 69340860       | 69446157      | 14q24.1                  | Alpha-actinin-1                                               |
| ACTN4      | 39138289       | 39222223      | 19q13.2                  | Alpha-actinin-4                                               |
| ACTR1A     | 104238986      | 104262482     | 10q24.32                 | Alpha-centractin                                              |
| ACTR1B     | 98272431       | 98280570      | 2q11.2                   | Beta-centractin                                               |
| ACTRT2     | 2938046        | 2939465       | 1p36.32                  | Actin-related protein T2                                      |
| ACY1       | 52009066       | 52023199      | 3p21.2                   | Aminoacylase-1                                                |
| ADA        | 43248163       | 43280874      | 20q13.12                 | Adenosine deaminase                                           |
| ADAM2      | 39601254       | 39695808      | 8p11.22                  | Disintegrin and metalloproteinase domain-containing protein 2 |
| ADAT1      | 75630879       | 75657198      | 16q23.1                  | tRNA-specific adenosine deaminase 1                           |
| ADCK4      | 41197434       | 41224112      | 19q13.2                  | AarF domain-containing protein kinase 4                       |
| ADFP       | 19108373       | 19149288      | 9p22.1                   | Perilipin-2                                                   |
| ADH5       | 99992132       | 100009952     | 4q23                     | Alcohol dehydrogenase class-3                                 |
| ADORA3     | 112025970      | 112106584     | 1p13.2                   | Adenosine receptor A3                                         |
| ADRBK1     | 67033881       | 67054027      | 11q13.2                  | Beta-adrenergic receptor kinase 1                             |
| AGA        | 178351924      | 178363657     | 4q34.3                   | N(4)-(beta-N-acetylglucosaminy)-L-asparaginase                |
| AGER       | 32148745       | 32152101      | 6p21.32                  | Advanced glycosylation end product-specific receptor          |
| AGMAT      | 15898848       | 15911605      | 1p36.21                  | Agmatinase, mitochondrial                                     |
| AGPAT5     | 6565878        | 6617184       | 8p23.1                   | 1-acyl-sn-glycerol-3-phosphate acyltransferase epsilon        |
| AGTR2      | 115301975      | 115306225     | Xq23                     | Type-2 angiotensin II receptor                                |
| AGTRAP     | 11796141       | 11814859      | 1p36.22                  | Type-1 angiotensin II receptor-associated protein             |
| AIPL1      | 6297013        | 6338519       | 17p13.2                  | Aryl-hydrocarbon-interacting protein-like 1                   |
| AK1        | 130628759      | 130640022     | 9q34.11                  | Adenylate kinase isoenzyme 1                                  |
| AK3L1      | 4711155        | 4742043       | 9p24.1                   | GTP:AMP phosphotransferase AK3, mitochondrial                 |
| AKAP10     | 19807615       | 19881656      | 17p11.2                  | A-kinase anchor protein 10, mitochondrial                     |
| AKR1B1     | 134127102      | 134144036     | 7q33                     | Aldose reductase                                              |

|         |           |           |          |                                                                |
|---------|-----------|-----------|----------|----------------------------------------------------------------|
| AKR1B10 | 134212344 | 134226160 | 7q33     | Aldo-keto reductase family 1 member B10                        |
| AKR1C4  | 5237425   | 5260912   | 10p15.1  | Aldo-keto reductase family 1 member C4                         |
| AKT1    | 105235686 | 105262088 | 14q32.33 | RAC-alpha serine/threonine-protein kinase                      |
| AKT3    | 243651535 | 244014381 | 1q43     | RAC-gamma serine/threonine-protein kinase                      |
| ALB     | 74262831  | 74287129  | 4q13.3   | Serum albumin                                                  |
| ALDH1A2 | 58245622  | 58790065  | 15q21.3  | Retinal dehydrogenase 2                                        |
| ALDH3A2 | 19551449  | 19580911  | 17p11.2  | Fatty aldehyde dehydrogenase                                   |
| ALDH3B1 | 67776048  | 67796744  | 11q13.2  | Aldehyde dehydrogenase family 3 member B1                      |
| ALDH4A1 | 19197926  | 19229275  | 1p36.13  | Delta-1-pyrroline-5-carboxylate dehydrogenase, mitochondrial   |
| ALDOA   | 30064411  | 30081778  | 16p11.2  | Fructose-bisphosphate aldolase A                               |
| ALF     | 38462442  | 38471278  | 1p34.3   | Four and a half LIM domains protein 3                          |
| ALG2    | 101978708 | 101984238 | 9q22.33  | Alpha-1,3/1,6-mannosyltransferase ALG2                         |
| ALG3    | 183960089 | 183967336 | 3q27.1   | Dol-P-Man:Man(5)GlcNAc(2)-PP-Dol alpha-1,3-mannosyltransferase |
| ALG9    | 111652919 | 111742305 | 11q23.1  | Alpha-1,2-mannosyltransferase ALG9                             |
| AMY2A   | 104159999 | 104168402 | 1p21.1   | Pancreatic alpha-amylase                                       |
| ANGPTL7 | 11249398  | 11256038  | 1p36.22  | Angiopoietin-related protein 7                                 |
| ANKH    | 14704910  | 14871887  | 5p15.2   | Progressive ankylosis protein homolog                          |
| ANKRA2  | 72848160  | 72861511  | 5q13.2   | Ankyrin repeat family A protein 2                              |
| ANKRD1  | 92671853  | 92681033  | 10q23.31 | Ankyrin repeat domain-containing protein 1                     |
| ANP32A  | 69070874  | 69113236  | 15q23    | Acidic leucine-rich nuclear phosphoprotein 32 family member A  |
| ANXA1   | 75766673  | 75785309  | 9q21.13  | Annexin A1                                                     |
| ANXA11  | 81910645  | 81965328  | 10q22.3  | Annexin A11                                                    |
| ANXA13  | 124693034 | 124749647 | 8q24.13  | Annexin A13                                                    |
| ANXA5   | 122589110 | 122618268 | 4q27     | Annexin A5                                                     |
| ANXA8   | 48255253  | 48279200  | 10q11.22 | Annexin A8                                                     |
| ANXA9   | 150954493 | 150968110 | 1q21.3   | Annexin A9                                                     |
| AP2A2   | 924894    | 1012239   | 11p15.5  | AP-2 complex subunit alpha-2                                   |
| AP2B1   | 33905065  | 34053436  | 17q12    | AP-2 complex subunit beta                                      |
| AP3S1   | 115177178 | 115249778 | 5q22.3   | AP-3 complex subunit sigma-1                                   |
| AP3S2   | 90373831  | 90437574  | 15q26.1  | AP-3 complex subunit sigma-2                                   |
| APBB2   | 40812044  | 41218731  | 4p13     | Amyloid beta A4 precursor protein-binding family B member 2    |
| APEH    | 49711435  | 49721396  | 3p21.31  | Acylamino-acid-releasing enzyme                                |
| APEX1   | 20923350  | 20925927  | 14q11.2  | DNA-(apurinic or apyrimidinic site) lyase                      |
| APEX2   | 55026790  | 55035490  | Xp11.21  | DNA-(apurinic or apyrimidinic site) lyase 2                    |
| APOA1   | 116706467 | 116708666 | 11q23.3  | Apolipoprotein A-I                                             |
| APOA2   | 161192082 | 161193421 | 1q23.3   | Apolipoprotein A-II                                            |
| APOD    | 195295573 | 195311076 | 3q29     | Apolipoprotein D                                               |
| APOE    | 45409011  | 45412650  | 19q13.32 | Apolipoprotein E                                               |
| APOH    | 64208151  | 64252643  | 17q24.2  | Beta-2-glycoprotein 1                                          |
| APOL2   | 36622256  | 36636000  | 22q12.3  | Apolipoprotein L2                                              |
| APPBP1  | 66836778  | 66907159  | 16q22.1  | NEDD8-activating enzyme E1 regulatory subunit                  |
| AQP2    | 50344524  | 50352664  | 12q13.12 | Aquaporin-2                                                    |
| AQP3    | 33441152  | 33447609  | 9p13.3   | Aquaporin-3                                                    |
| AQP5    | 50355653  | 50359464  | 12q13.12 | Aquaporin-5                                                    |
| AQP5    | 50355653  | 50359464  | 12q13.12 | Aquaporin-5                                                    |
| AQP9    | 58430368  | 58478110  | 15q21.3  | Aquaporin-9                                                    |
| ARAF    | 47420516  | 47431307  | Xp11.23  | Serine/threonine-protein kinase A-Raf                          |
| ARAF1   | 47420516  | 47431307  | Xp11.23  | Serine/threonine-protein kinase A-Raf                          |
| ARC     | 143692405 | 143696833 | 8q24.3   | Activity-regulated cytoskeleton-associated protein             |
| ARFGAP3 | 43192508  | 43254112  | 22q13.2  | ADP-ribosylation factor GTPase-activating protein 3            |
| ARFIP2  | 6496910   | 6502666   | 11p15.4  | Arfaptin-2                                                     |

|          |           |           |          |                                                              |
|----------|-----------|-----------|----------|--------------------------------------------------------------|
| ARG1     | 131894284 | 131905472 | 6q23.2   | Arginase-1                                                   |
| ARHA     | 49396578  | 49450431  | 3p21.31  | Transforming protein RhoA                                    |
| ARHB     | 20646835  | 20649200  | 2p24.1   | Rho-related GTP-binding protein RhoB                         |
| ARHC     | 113243728 | 113250056 | 1p13.2   | Rho-related GTP-binding protein RhoC                         |
| ARHG     | 3848208   | 3862213   | 11p15.4  | Rho-related GTP-binding protein RhoG                         |
| ARHGDI1B | 15094951  | 15114662  | 12p12.3  | Rho GDP-dissociation inhibitor 2                             |
| ARHGEF1  | 42387228  | 42434302  | 19q13.2  | Rho guanine nucleotide exchange factor 1                     |
| ARHGEF5  | 144052381 | 144077725 | 7q35     | Rho guanine nucleotide exchange factor 5                     |
| ARHI     | 68511645  | 68517314  | 1p31.3   | GTP-binding protein Di-Ras3                                  |
| ARL1     | 101786898 | 101801598 | 12q23.2  | ADP-ribosylation factor-like protein 1                       |
| ARL3     | 104433488 | 104474164 | 10q24.32 | ADP-ribosylation factor-like protein 3                       |
| ARL5A    | 152645498 | 152685006 | 2q23.3   | ADP-ribosylation factor-like protein 5A                      |
| ARL5B    | 18948334  | 18970568  | 10p12.31 | ADP-ribosylation factor-like protein 5B                      |
| ARMCX2   | 100910267 | 100914876 | Xq22.1   | Armadillo repeat-containing X-linked protein 2               |
| ARMCX3   | 100877787 | 100882833 | Xq22.1   | Armadillo repeat-containing X-linked protein 3               |
| ARPM1    | 169484709 | 169487683 | 3q26.2   | Actin-related protein T3                                     |
| ARRB2    | 4613784   | 4624794   | 17p13.2  | Beta-arrestin-2                                              |
| ART3     | 76932337  | 77033955  | 4q21.1   | Ecto-ADP-ribosyltransferase 3                                |
| ASB3     | 53759810  | 54087170  | 2p16.2   | Ankyrin repeat and SOCS box protein 3                        |
| ASCL1    | 103351464 | 103354294 | 12q23.2  | Achaete-scute homolog 1                                      |
| ASGR1    | 7076750   | 7082883   | 17p13.1  | Asialoglycoprotein receptor 1                                |
| ASGR2    | 7004641   | 7019019   | 17p13.1  | Asialoglycoprotein receptor 2                                |
| ASNS     | 97481430  | 97501854  | 7q21.3   | Asparagine synthetase [glutamine-hydrolyzing]                |
| ASPA     | 3375668   | 3406713   | 17p13.2  | Aspartoacylase                                               |
| ASPSR1   | 79934683  | 79975282  | 17q25.3  | Tether containing UBX domain for GLUT4                       |
| ATF3     | 212738676 | 212794119 | 1q32.3   | Cyclic AMP-dependent transcription factor ATF-3              |
| ATF4     | 39915700  | 39918691  | 22q13.1  | Cyclic AMP-dependent transcription factor ATF-4              |
| ATG10    | 81267844  | 81572676  | 5q14.1   | Ubiquitin-like-conjugating enzyme ATG10                      |
| ATG3     | 112251356 | 112280893 | 3q13.2   | Ubiquitin-like-conjugating enzyme ATG3                       |
| ATG4C    | 63249806  | 63331184  | 1p31.3   | Cysteine protease ATG4C                                      |
| ATIC     | 216176540 | 216214487 | 2q35     | Bifunctional purine biosynthesis protein PURH                |
| ATOH7    | 69990386  | 69991871  | 10q21.3  | Protein atonal homolog 7                                     |
| ATP5B    | 57031959  | 57039798  | 12q13.3  | ATP synthase subunit beta, mitochondrial                     |
| ATP5G2   | 54026510  | 54071192  | 12q13.13 | ATP synthase F(0) complex subunit C2, mitochondrial          |
| ATP6V0D1 | 67471917  | 67515140  | 16q22.1  | V-type proton ATPase subunit d 1                             |
| ATXN10   | 46067678  | 46241187  | 22q13.31 | Ataxin-10                                                    |
| AUH      | 93976097  | 94124195  | 9q22.31  | Methylglutaconyl-CoA hydratase, mitochondrial                |
| AURKA    | 54944445  | 54967393  | 20q13.2  | Aurora kinase A                                              |
| AVPI1    | 99437181  | 99447080  | 10q24.2  | Arginine vasopressin-induced protein 1                       |
| AYP1     | 38059189  | 38069245  | 14q21.1  | Hepatocyte nuclear factor 3-alpha                            |
| B3GNT1   | 66112843  | 66115163  | 11q13.2  | Beta-1,4-glucuronyltransferase 1                             |
| B4-2     | 89790470  | 89794879  | 6q15     | Proline-rich nuclear receptor coactivator 1                  |
| B4GALT3  | 161141100 | 161147287 | 1q23.3   | Beta-1,4-galactosyltransferase 3                             |
| B4GALT7  | 177027101 | 177037348 | 5q35.3   | Beta-1,4-galactosyltransferase 7                             |
| BAAT     | 104122699 | 104145801 | 9q31.1   | Bile acid-CoA:amino acid N-acyltransferase                   |
| BACE1    | 117156402 | 117186975 | 11q23.3  | Beta-secretase 1                                             |
| BAD      | 64037302  | 64052176  | 11q13.1  | Bcl2-associated agonist of cell death                        |
| BAG1     | 33247818  | 33264761  | 9p13.3   | BAG family molecular chaperone regulator 1                   |
| BAG3     | 121410882 | 121437331 | 10q26.11 | BAG family molecular chaperone regulator 3                   |
| BAIAP2   | 79008948  | 79091232  | 17q25.3  | Brain-specific angiogenesis inhibitor 1-associated protein 2 |
| BAK1     | 33540329  | 33548019  | 6p21.31  | Bcl-2 homologous antagonist/killer                           |
| BANP     | 87982850  | 88110924  | 16q24.2  | Protein BANP                                                 |
| BAP1     | 52435029  | 52444366  | 3p21.1   | Ubiquitin carboxyl-terminal hydrolase BAP1                   |

|          |            |            |          |                                                                          |
|----------|------------|------------|----------|--------------------------------------------------------------------------|
| BASP1    | 17065707   | 17276943   | 5p15.1   | Brain acid soluble protein 1                                             |
| BAT4     | 31629006   | 31634060   | 6p21.33  | G patch domain and ankyrin repeat-containing protein 1                   |
| BATF     | 75988768   | 76013358   | 14q24.3  | Basic leucine zipper transcriptional factor ATF-like                     |
| BAX      | 49458072   | 49465055   | 19q13.33 | Apoptosis regulator BAX                                                  |
| BBOX1    | 27062272   | 27149356   | 11p14.2  | Gamma-butyrobetaine dioxygenase                                          |
| BBS2     | 56500748   | 56554195   | 16q12.2  | Bardet-Biedl syndrome 2 protein                                          |
| BBS4     | 72978527   | 73030817   | 15q24.1  | Bardet-Biedl syndrome 4 protein                                          |
| BC-2     | 59062933   | 59066491   | 19q13.43 | Charged multivesicular body protein 2a                                   |
| BCAS2    | 115110178  | 115124260  | 1p13.2   | Pre-mRNA-splicing factor SPF27                                           |
| BCAT2    | 49298319   | 49314286   | 19q13.33 | Branched-chain-amino-acid aminotransferase, mitochondrial                |
| BCL10    | 85731931   | 85742773   | 1p22.3   | B-cell lymphoma/leukemia 10                                              |
| BCL2     | 60790579   | 60987361   | 18q21.33 | Apoptosis regulator Bcl-2                                                |
| BCL2A1   | 80253231   | 80263788   | 15q25.1  | Bcl-2-related protein A1                                                 |
| BCL2L1   | 30252255   | 30311792   | 20q11.21 | Bcl-2-like protein 1                                                     |
| BCL2L13  | 18111621   | 18213388   | 22q11.21 | Bcl-2-like protein 13                                                    |
| BECN1    | 40962152   | 40985367   | 17q21.31 | Beclin-1                                                                 |
| BET1     | 93592074   | 93633694   | 7q21.3   | BET1 homolog                                                             |
| BGN      | 152760397  | 152775012  | Xq28     | Biglycan                                                                 |
| BHMT2    | 78365540   | 78385289   | 5q14.1   | S-methylmethionine--homocysteine S-methyltransferase BHMT2               |
| BIK      | 43506754   | 43525718   | 22q13.2  | Bcl-2-interacting killer                                                 |
| BIRC5    | 76210267   | 76221717   | 17q25.3  | Baculoviral IAP repeat-containing protein 5                              |
| BIRC7    | 61867235   | 61871859   | 20q13.33 | Baculoviral IAP repeat-containing protein 7                              |
| BLZF1    | 169337208  | 169365778  | 1q24.2   | Golgin-45                                                                |
| BMP10    | 69092613   | 69098649   | 2p13.3   | Bone morphogenetic protein 10                                            |
| BMP5     | 55618443   | 55740362   | 6p12.1   | Bone morphogenetic protein 5                                             |
| BMP7     | 55743804   | 55841685   | 20q13.31 | Bone morphogenetic protein 7                                             |
| BMPRI1A  | 88516407   | 88692595   | 10q23.2  | Bone morphogenetic protein receptor type-1A                              |
| BNIP2    | 59951345   | 59981733   | 15q22.2  | BCL2/adenovirus E1B 19 kDa protein-interacting protein 2                 |
| BOK      | 242498136  | 242513546  | 2q37.3   | Bcl-2-related ovarian killer protein                                     |
| BPIL1    | 31595406   | 31611515   | 20q11.21 | BPI fold-containing family B member 2                                    |
| BRE      | 28112808   | 28561768   | 2p23.2   | BRCA1-A complex subunit BRE                                              |
| BTBD1    | 83685174   | 83736106   | 15q25.2  | BTB/POZ domain-containing protein 1                                      |
| BTBD14A  | 138898383  | 138987131  | 9q34.3   | Nucleus accumbens-associated protein 2                                   |
| BTF3     | 72794233   | 72801460   | 5q13.2   | Transcription factor BTF3                                                |
| BTG1     | 92536286   | 92539673   | 12q21.33 | Protein BTG1                                                             |
| BUD13    | 116618886  | 116643704  | 11q23.3  | BUD13 homolog                                                            |
| BZW1     | 201675317  | 201688569  | 2q33.1   | Basic leucine zipper and W2 domain-containing protein 1                  |
| BZW2     | 16685756   | 16746148   | 7p21.1   | Basic leucine zipper and W2 domain-containing protein 2                  |
| C10orf33 | 100143322  | 100174941  | 10q24.2  | Pyridine nucleotide-disulfide oxidoreductase domain-containing protein 2 |
| C11orf64 | 60383209   | 60454622   | 11q12.2  | Putative uncharacterized protein encoded by LINC00301                    |
| C11orf73 | 86013253   | 86056969   | 11q14.2  | Protein Hikeshi                                                          |
| C12orf24 | 110906169  | 110928190  | 12q24.11 | Protein FAM216A                                                          |
| C15orf48 | 45,430,529 | 45,448,761 | 15q21.1  | Chromosome 15 Open Reading Frame 48                                      |
| C19orf28 | 3538259    | 3574288    | 19p13.3  | Major facilitator superfamily domain-containing protein 12               |
| C19orf43 | 12841454   | 12845589   | 19p13.2  | Uncharacterized protein C19orf43                                         |
| C19orf6  | 1009647    | 1021117    | 19p13.3  | Membralin                                                                |

|          |             |             |          |                                                                      |
|----------|-------------|-------------|----------|----------------------------------------------------------------------|
| C1orf128 | 24104895    | 24114722    | 1p36.11  | PITH domain-containing protein 1                                     |
| C1orf162 | 112016414   | 112021134   | 1p13.2   | Transmembrane protein C1orf162                                       |
| C1orf182 | 156307105   | 156316786   | 1q22     | TSSK6-activating co-chaperone protein                                |
| C1orf48  | 212899495   | 212965124   | 1q32.3   | Kinetochore-associated protein NSL1 homolog                          |
| C1orf62  | 109358520   | 109506106   | 1p13.3   | Protein AKNAD1                                                       |
| C1QB     | 22979255    | 22988031    | 1p36.12  | Complement C1q subcomponent subunit B                                |
| C1QTNF1  | 77018896    | 77045870    | 17q25.3  | Complement C1q tumor necrosis factor-related protein 1               |
| C1QTNF2  | 159774758   | 159797648   | 5q33.3   | Complement C1q tumor necrosis factor-related protein 2               |
| C1QTNF6  | 37576207    | 37595425    | 22q12.3  | Complement C1q tumor necrosis factor-related protein 6               |
| C21orf66 | 34106210    | 34144169    | 21q22.11 | PAX3- and PAX7-binding protein 1                                     |
| C2orf15  | 99757948    | 99939204    | 2q11.2   | Uncharacterized protein C2orf15                                      |
| C2orf30  | 54014181    | 54045956    | 2p16.2   | Endoplasmic reticulum lectin 1                                       |
| C2orf4   | 32090129    | 32236299    | 2p22.3   | Protein MEMO1                                                        |
| C3AR1    | 8210898     | 8219067     | 12p13.31 | C3a anaphylatoxin chemotactic receptor                               |
| C3orf37  | 128997671   | 129025029   | 3q21.3   | Embryonic stem cell-specific 5-hydroxymethylcytosine-binding protein |
| C4BPA    | 207277607   | 207318317   | 1q32.2   | C4b-binding protein alpha chain                                      |
| C5AR1    | 47793280    | 47825323    | 19q13.32 | C5a anaphylatoxin chemotactic receptor 1                             |
| C5orf15  | 133,955,502 | 133,968,787 | 5q31.1   | Chromosome 5 Open Reading Frame 15                                   |
| C6       | 41142336    | 41261540    | 5p13.1   | Complement component C6                                              |
| C6orf55  | 142468367   | 142545826   | 6q24.1   | Vacuolar protein sorting-associated protein VTA1 homolog             |
| C9orf116 | 138387027   | 138393580   | 9q34.3   | UPF0691 protein C9orf116                                             |
| C9orf156 | 100666771   | 100684852   | 9q22.33  | Nef-associated protein 1                                             |
| C9orf45  | 123,109,494 | 123,115,477 | 9q33.3   | Chromosome 9 Open Reading Frame 45                                   |
| C9orf80  | 115446206   | 115480516   | 9q32     | SOSS complex subunit C                                               |
| CA12     | 63613577    | 63674360    | 15q22.2  | Carbonic anhydrase 12                                                |
| CA2      | 86376081    | 86393722    | 8q21.2   | Carbonic anhydrase 2                                                 |
| CABP1    | 121078355   | 121105127   | 12q24.31 | Calcium-binding protein 1                                            |
| CACNG4   | 64961026    | 65029514    | 17q24.2  | Voltage-dependent calcium channel gamma-4 subunit                    |
| CACNG6   | 54495542    | 54515923    | 19q13.42 | Voltage-dependent calcium channel gamma-6 subunit                    |
| CAGE1    | 7326889     | 7389976     | 6p24.3   | Cancer-associated gene 1 protein                                     |
| CALM2    | 47387221    | 47403740    | 2p21     | Calmodulin                                                           |
| CALML3   | 5566924     | 5568225     | 10p15.1  | Calmodulin-like protein 3                                            |
| CALU     | 128379346   | 128411861   | 7q32.1   | Calumenin                                                            |
| CAMK1D   | 12391481    | 12877545    | 10p13    | Calcium/calmodulin-dependent protein kinase type 1D                  |
| CAMKK1   | 3763609     | 3798185     | 17p13.2  | Calcium/calmodulin-dependent protein kinase kinase 1                 |
| CAMKK2   | 121675497   | 121736111   | 12q24.31 | Calcium/calmodulin-dependent protein kinase kinase 2                 |
| CAMKV    | 49895421    | 49907655    | 3p21.31  | CaM kinase-like vesicle-associated protein                           |
| CAPN1    | 64948037    | 64979477    | 11q13.1  | Calpain-1 catalytic subunit                                          |
| CAPN10   | 241526133   | 241557122   | 2q37.3   | Calpain-10                                                           |
| CART     | 71014990    | 71016875    | 5q13.2   | Cocaine- and amphetamine-regulated transcript protein                |
| CASP2    | 142985308   | 143004789   | 7q34     | Caspase-2                                                            |
| CASP3    | 185548850   | 185570663   | 4q35.1   | Caspase-3                                                            |
| CASP4    | 104813593   | 104840163   | 11q22.3  | Caspase-4                                                            |
| CASP6    | 110609785   | 110624739   | 4q25     | Caspase-6                                                            |

|          |            |            |          |                                                     |
|----------|------------|------------|----------|-----------------------------------------------------|
| CASQ1    | 160160285  | 160171676  | 1q23.2   | Calsequestrin-1                                     |
| CASQ2    | 116242628  | 116311402  | 1p13.1   | Calsequestrin-2                                     |
| CAST     | 95860971   | 96115299   | 5q15     | Calpastatin                                         |
| CBLB     | 105374305  | 105588396  | 3q13.11  | E3 ubiquitin-protein ligase CBL-B                   |
| CBR1     | 37442239   | 37445464   | 21q22.12 | Carbonyl reductase [NADPH] 1                        |
| CBR1     | 37442239   | 37445464   | 21q22.12 | Carbonyl reductase [NADPH] 1                        |
| CBR1     | 37442239   | 37445464   | 21q22.12 | Carbonyl reductase [NADPH] 1                        |
| CBR3     | 37507210   | 37518864   | 21q22.12 | Carbonyl reductase [NADPH] 3                        |
| CBX6     | 39257455   | 39268319   | 22q13.1  | Chromobox protein homolog 6                         |
| CCDC102A | 57546090   | 57570511   | 16q21    | Coiled-coil domain-containing protein 102A          |
| CCDC104  | 55,519,595 | 55,545,879 | 2p16.1   | Cilia And Flagella Associated Protein 36            |
| CCDC107  | 35658301   | 35661508   | 9p13.3   | Coiled-coil domain-containing protein 107           |
| CCDC16   | 33288549   | 33290205   | 17q12    | Zinc finger protein 830                             |
| CCDC47   | 61822610   | 61853711   | 17q23.3  | Coiled-coil domain-containing protein 47            |
| CCDC72   | 48481667   | 48485616   | 3p21.31  | Translation machinery-associated protein 7          |
| CCDC86   | 60609544   | 60618554   | 11q12.2  | Coiled-coil domain-containing protein 86            |
| CCL11    | 32612687   | 32615353   | 17q12    | Eotaxin                                             |
| CCL13    | 32683471   | 32685629   | 17q12    | C-C motif chemokine 13                              |
| CCL20    | 228678558  | 228682272  | 2q36.3   | C-C motif chemokine 20                              |
| CCL27    | 34661877   | 34664045   | 9p13.3   | C-C motif chemokine 27                              |
| CCL5     | 34198495   | 34207797   | 17q12    | C-C motif chemokine 5                               |
| CCND1    | 69455855   | 69469242   | 11q13.3  | G1/S-specific cyclin-D1                             |
| CCND2    | 4382938    | 4414516    | 12p13.32 | G1/S-specific cyclin-D2                             |
| CCND3    | 41902671   | 42018095   | 6p21.1   | G1/S-specific cyclin-D3                             |
| CCNE1    | 30302805   | 30315215   | 19q12    | G1/S-specific cyclin-E1                             |
| CCNH     | 86687311   | 86708836   | 5q14.3   | Cyclin-H                                            |
| CCNI     | 77968311   | 77997158   | 4q21.1   | Cyclin-I                                            |
| CCR6     | 167525295  | 167553184  | 6q27     | C-C chemokine receptor type 6                       |
| CCS      | 66360292   | 66373490   | 11q13.2  | Copper chaperone for superoxide dismutase           |
| CCT3     | 156278759  | 156337664  | 1q22     | T-complex protein 1 subunit gamma                   |
| CCT5     | 10250033   | 10266524   | 5p15.2   | T-complex protein 1 subunit epsilon                 |
| CCT7     | 73460548   | 73480149   | 2p13.2   | T-complex protein 1 subunit eta                     |
| CD151    | 832843     | 839831     | 11p15.5  | CD151 antigen                                       |
| CD160    | 145695798  | 145715614  | 1q21.1   | CD160 antigen                                       |
| CD19     | 28943260   | 28950667   | 16p11.2  | B-lymphocyte antigen CD19                           |
| CD207    | 71057347   | 71062952   | 2p13.3   | C-type lectin domain family 4 member K              |
| CD2BP2   | 30362087   | 30366682   | 16p11.2  | CD2 antigen cytoplasmic tail-binding protein 2      |
| CD34     | 208057594  | 208084747  | 1q32.2   | Hematopoietic progenitor cell antigen CD34          |
| CD36     | 79998891   | 80308593   | 7q21.11  | Platelet glycoprotein 4                             |
| CD37     | 49838428   | 49846592   | 19q13.33 | Leukocyte antigen CD37                              |
| CD40     | 44746911   | 44758502   | 20q13.12 | Tumor necrosis factor receptor superfamily member 5 |
| CD44     | 35160417   | 35253949   | 11p13    | CD44 antigen                                        |
| CD48     | 160648536  | 160681641  | 1q23.3   | CD48 antigen                                        |
| CD59     | 33719807   | 33757991   | 11p13    | CD59 glycoprotein                                   |
| CD63     | 56119107   | 56123491   | 12q13.2  | CD63 antigen                                        |
| CD69     | 9905082    | 9913497    | 12p13.31 | Early activation antigen CD69                       |
| CD7      | 80272744   | 80275478   | 17q25.3  | T-cell antigen CD7                                  |
| CD74     | 149781200  | 149792492  | 5q32     | HLA class II histocompatibility antigen gamma chain |
| CD82     | 44585977   | 44641913   | 11p11.2  | CD82 antigen                                        |
| CDC2     | 50796310   | 50883179   | 14q21.3  | Cyclin-dependent kinase-like 1                      |
| CDC20    | 43824626   | 43828874   | 1p34.2   | Cell division cycle protein 20 homolog              |
| CDC27    | 45195069   | 45266788   | 17q21.32 | Cell division cycle protein 27 homolog              |
| CDC34    | 531714     | 542097     | 19p13.3  | Ubiquitin-conjugating enzyme E2 R1                  |

|          |           |           |          |                                                           |
|----------|-----------|-----------|----------|-----------------------------------------------------------|
| CDC42    | 22379120  | 22419437  | 1p36.12  | Cell division control protein 42 homolog                  |
| CDC42EP1 | 37956454  | 37965412  | 22q13.1  | Cdc42 effector protein 1                                  |
| CDC42EP2 | 65082289  | 65089900  | 11q13.1  | Cdc42 effector protein 2                                  |
| CDC45L   | 19466982  | 19508135  | 22q11.21 | Cell division control protein 45 homolog                  |
| CDC5L    | 44355262  | 44418163  | 6p21.1   | Cell division cycle 5-like protein                        |
| CDCA1    | 163236366 | 163325554 | 1q23.3   | Kinetochore protein Nuf2                                  |
| CDCA4    | 105475910 | 105487485 | 14q32.33 | Cell division cycle-associated protein 4                  |
| CDCA5    | 64833772  | 64851636  | 11q13.1  | Sororin                                                   |
| CDH15    | 89238175  | 89261900  | 16q24.3  | Cadherin-15                                               |
| CDIPT    | 29869678  | 29875057  | 16p11.2  | CDP-diacylglycerol--inositol 3-phosphatidyltransferase    |
| CDK2     | 56360553  | 56366568  | 12q13.2  | Cyclin-dependent kinase 2                                 |
| CDK4     | 58141510  | 58149796  | 12q14.1  | Cyclin-dependent kinase 4                                 |
| CDK5     | 150750899 | 150755617 | 7q36.1   | Cyclin-dependent-like kinase 5                            |
| CDK6     | 92234235  | 92465908  | 7q21.2   | Cyclin-dependent kinase 6                                 |
| CDKN1A   | 36644305  | 36655116  | 6p21.2   | Cyclin-dependent kinase inhibitor 1                       |
| CDKN1B   | 12867992  | 12875305  | 12p13.1  | Cyclin-dependent kinase inhibitor 1B                      |
| CDKN2A   | 21967751  | 21995300  | 9p21.3   | Cyclin-dependent kinase inhibitor 2A                      |
| CDKN2B   | 22002902  | 22009362  | 9p21.3   | Cyclin-dependent kinase 4 inhibitor B                     |
| CDKN2C   | 51426417  | 51440305  | 1p32.3   | Cyclin-dependent kinase 4 inhibitor C                     |
| CDSN     | 31127873  | 31133179  | 6p22.1   | Corneodesmosin                                            |
| CEACAM8  | 43084393  | 43099207  | 19q13.2  | Carcinoembryonic antigen-related cell adhesion molecule 8 |
| CEBPG    | 33864236  | 33873592  | 19q13.11 | CCAAT/enhancer-binding protein gamma                      |
| CENPH    | 68485375  | 68506184  | 5q13.2   | Centromere protein H                                      |
| CENPK    | 64813593  | 64858998  | 5q12.3   | Centromere protein K                                      |
| CES1     | 55836763  | 55867249  | 16q12.2  | Liver carboxylesterase 1                                  |
| CES2     | 66968347  | 66978999  | 16q22.1  | Cocaine esterase                                          |
| CFB      | 31895475  | 31919861  | 6p21.33  | Complement factor B                                       |
| CFHR1    | 196788887 | 196801319 | 1q31.3   | Complement factor H-related protein 1                     |
| CFHR2    | 196788898 | 196928356 | 1q31.3   | Complement factor H-related protein 2                     |
| CFP      | 47483612  | 47489704  | Xp11.23  | Properdin                                                 |
| CH25H    | 90965694  | 90967071  | 10q23.31 | Cholesterol 25-hydroxylase                                |
| CHEK1    | 125495036 | 125546150 | 11q24.2  | Serine/threonine-protein kinase Chk1                      |
| CHEK2    | 29083731  | 29138410  | 22q12.1  | Serine/threonine-protein kinase Chk2                      |
| CHMP2A   | 59062933  | 59066491  | 19q13.43 | Charged multivesicular body protein 2a                    |
| CHMP5    | 33264940  | 33281977  | 9p13.3   | Charged multivesicular body protein 5                     |
| CHODL    | 19273580  | 19639690  | 21q21.1  | Chondrolectin                                             |
| CHRA1    | 141521397 | 141527236 | 8q24.3   | Chromatin accessibility complex protein 1                 |
| CHRM1    | 62676151  | 62689279  | 11q12.3  | Muscarinic acetylcholine receptor M1                      |
| CHRNA1   | 7348380   | 7361026   | 17p13.1  | Acetylcholine receptor subunit beta                       |
| CHST12   | 2443223   | 2474242   | 7p22.3   | Carbohydrate sulfotransferase 12                          |
| CHST8    | 34112861  | 34264414  | 19q13.11 | Carbohydrate sulfotransferase 8                           |
| CIB1     | 90773207  | 90777279  | 15q26.1  | Calcium and integrin-binding protein 1                    |
| CILP     | 65488337  | 65503826  | 15q22.31 | Cartilage intermediate layer protein 1                    |
| CITED1   | 71521488  | 71527037  | Xq13.1   | Cbp/p300-interacting transactivator 1                     |
| CITED2   | 139693393 | 139695757 | 6q24.1   | Cbp/p300-interacting transactivator 2                     |
| CKAP1    | 36605191  | 36616849  | 19q13.12 | Tubulin-folding cofactor B                                |
| CKLF     | 66586466  | 66600154  | 16q21    | Chemokine-like factor                                     |
| CKMT1B   | 43885252  | 43897099  | 15q15.3  | Creatine kinase U-type, mitochondrial                     |
| CKN1     | 60169658  | 60240900  | 5q12.1   | DNA excision repair protein ERCC-8                        |
| CKS1B    | 154947129 | 154951725 | 1q21.3   | Cyclin-dependent kinases regulatory subunit 1             |
| CLCC1    | 109472130 | 109506111 | 1p13.3   | Chloride channel CLIC-like protein 1                      |
| CLCF1    | 67131639  | 67141648  | 11q13.2  | Cardiotrophin-like cytokine factor 1                      |
| CLDN1    | 190023490 | 190040264 | 3q28     | Claudin-1                                                 |

|         |           |           |          |                                                                |
|---------|-----------|-----------|----------|----------------------------------------------------------------|
| CLEC1A  | 10222153  | 10264226  | 12p13.2  | C-type lectin domain family 1 member A                         |
| CLEC2B  | 10005583  | 10022735  | 12p13.31 | C-type lectin domain family 2 member B                         |
| CLIC1   | 31698358  | 31707540  | 6p21.33  | Chloride intracellular channel protein 1                       |
| CLIC2   | 154505500 | 154563966 | Xq28     | Chloride intracellular channel protein 2                       |
| CLIC5   | 45868045  | 46048132  | 6p21.1   | Chloride intracellular channel protein 5                       |
| CLNS1A  | 77225981  | 77348850  | 11q14.1  | Methylosome subunit pICln                                      |
| CLPP    | 6361463   | 6368919   | 19p13.3  | ATP-dependent Clp protease proteolytic subunit, mitochondrial  |
| CLSTN1  | 9789084   | 9884584   | 1p36.22  | Calsyntenin-1                                                  |
| CLU     | 27454434  | 27472548  | 8p21.1   | Clusterin                                                      |
| CMKOR1  | 237476430 | 237491001 | 2q37.3   | Atypical chemokine receptor 3                                  |
| CNIH4   | 224544552 | 224567161 | 1q42.11  | Protein cornichon homolog 4                                    |
| CNN2    | 1026298   | 1039068   | 19p13.3  | Calponin-2                                                     |
| CNN3    | 95362507  | 95392834  | 1p21.3   | Calponin-3                                                     |
| CNOT10  | 32726637  | 32815367  | 3p22.3   | CCR4-NOT transcription complex subunit 10                      |
| CNP     | 40118759  | 40129749  | 17q21.2  | 2',3'-cyclic-nucleotide 3'-phosphodiesterase                   |
| CNTROB  | 7835419   | 7853236   | 17p13.1  | Centrobilin                                                    |
| COG1    | 71189129  | 71204646  | 17q25.1  | Conserved oligomeric Golgi complex subunit 1                   |
| COMT    | 19929130  | 19957498  | 22q11.21 | Catechol O-methyltransferase                                   |
| COPB1   | 14464986  | 14521573  | 11p15.2  | Coatamer subunit beta                                          |
| COPE    | 19010323  | 19030206  |          | Coatamer subunit epsilon                                       |
| COPS5   | 67955314  | 67996018  | 8q13.1   | COP9 signalosome complex subunit 5                             |
| COPS6   | 99686577  | 99689823  | 7q22.1   | COP9 signalosome complex subunit 6                             |
| COPZ2   | 46103533  | 46115392  | 17q21.32 | Coatamer subunit zeta-2                                        |
| COQ2    | 84182689  | 84206067  | 4q21.23  | 4-hydroxybenzoate polyprenyltransferase, mitochondrial         |
| COQ6    | 74416629  | 74430373  | 14q24.3  | Ubiquinone biosynthesis monooxygenase COQ6, mitochondrial      |
| CORO1B  | 67205519  | 67211292  | 11q13.2  | Coronin-1B                                                     |
| COX11   | 53029263  | 53046146  | 17q22    | Cytochrome c oxidase assembly protein COX11, mitochondrial     |
| COX4I1  | 85832239  | 85840650  | 16q24.1  | Cytochrome c oxidase subunit 4 isoform 1, mitochondrial        |
| COX5B   | 98262503  | 98264846  | 2q11.2   | Cytochrome c oxidase subunit 5B, mitochondrial                 |
| COX6A1  | 120875893 | 120878545 | 12q24.31 | Cytochrome c oxidase subunit 6A1, mitochondrial                |
| COX6A1  | 120875893 | 120878545 | 12q24.31 | Cytochrome c oxidase subunit 6A1, mitochondrial                |
| COX6A2  | 31439052  | 31439967  | 16p11.2  | Cytochrome c oxidase subunit 6A2, mitochondrial                |
| COX6B1  | 36139125  | 36149763  | 19q13.12 | Cytochrome c oxidase subunit 6B1                               |
| COX7C   | 85913721  | 85916779  | 5q14.3   | Cytochrome c oxidase subunit 7C, mitochondrial                 |
| CP110   | 19535133  | 19564730  | 16p12.3  | Centriolar coiled-coil protein of 110 kDa                      |
| CPSF1   | 145618444 | 145634753 | 8q24.3   | Cleavage and polyadenylation specificity factor subunit 1      |
| CPT1C   | 50194155  | 50216988  | 19q13.33 | Carnitine O-palmitoyltransferase 1, brain isoform              |
| CRABP2  | 156669398 | 156675608 | 1q23.1   | Cellular retinoic acid-binding protein 2                       |
| CRADD   | 94071151  | 94288616  | 12q22    | Death domain-containing protein CRADD                          |
| CREB1   | 208394461 | 208468155 | 2q33.3   | Cyclic AMP-responsive element-binding protein 1                |
| CREB3L1 | 46299212  | 46342972  | 11p11.2  | Cyclic AMP-responsive element-binding protein 3-like protein 1 |
| CREG1   | 167498914 | 167523004 | 1q24.2   | Protein CREG1                                                  |
| CRIP1   | 105952654 | 105955284 | 14q32.33 | Cysteine-rich protein 1                                        |
| CRIP2   | 105939299 | 105946499 | 14q32.33 | Cysteine-rich protein 2                                        |
| CRK     | 1323983   | 1366456   | 17p13.3  | Adapter molecule crk                                           |
| CRMP1   | 5749811   | 5894785   | 4p16.2   | Dihydropyrimidinase-related protein 1                          |
| CRTAP   | 33155471  | 33189265  | 3p22.3   | Cartilage-associated protein                                   |
| CRYAB   | 111779289 | 111794446 | 11q23.1  | Alpha-crystallin B chain                                       |

|           |           |           |          |                                                                               |
|-----------|-----------|-----------|----------|-------------------------------------------------------------------------------|
| CSDA      | 10851683  | 10875911  | 12p13.2  | Y-box-binding protein 3                                                       |
| CSF1      | 110452864 | 110473614 | 1p13.3   | Macrophage colony-stimulating factor 1                                        |
| CSF3      | 38171614  | 38174066  | 17q21.1  | Granulocyte colony-stimulating factor                                         |
| CSH2      | 61949372  | 61951126  | 17q23.3  | Chorionic somatomammotropin hormone 2                                         |
| CSNK1A1L  | 37677398  | 37679803  | 13q13.3  | Casein kinase I isoform alpha-like                                            |
| CSNK1E    | 38686697  | 38794527  | 22q13.1  | Casein kinase I isoform epsilon                                               |
| CSNK2A2   | 58191811  | 58231824  | 16q21    | Casein kinase II subunit alpha'                                               |
| CSNK2B    | 31633013  | 31638120  | 6p21.33  | Casein kinase II subunit beta                                                 |
| CSRP2BP   | 18118762  | 18169031  | 20p11.23 | Cysteine-rich protein 2-binding protein                                       |
| CST3      | 23608534  | 23619110  | 20p11.21 | Cystatin-C                                                                    |
| CST6      | 65779312  | 65780976  | 11q13.1  | Cystatin-M                                                                    |
| CSTF1     | 54967427  | 54979518  | 20q13.2  | Cleavage stimulation factor subunit 1                                         |
| CSTF2     | 100075384 | 100095921 | Xq22.1   | Cleavage stimulation factor subunit 2                                         |
| CTBP1     | 1205236   | 1243741   | 4p16.3   | C-terminal-binding protein 1                                                  |
| CTGF      | 132269316 | 132272513 | 6q23.2   | Connective tissue growth factor                                               |
| CTNNA1    | 137946656 | 138270723 | 5q31.2   | Catenin alpha-1                                                               |
| CTNS      | 3539762   | 3564836   | 17p13.2  | Cystinosin                                                                    |
| CTSC      | 88026760  | 88070955  | 11q14.2  | Dipeptidyl peptidase 1                                                        |
| CTSG      | 25042728  | 25045466  | 14q12    | Cathepsin G                                                                   |
| CTSH      | 79213400  | 79241916  | 15q25.1  | Pro-cathepsin H                                                               |
| CTSL      | 90340434  | 90346308  | 9q21.33  | Cathepsin L1                                                                  |
| CTSZ      | 57570240  | 57582302  | 20q13.32 | Cathepsin Z                                                                   |
| CUL4B     | 119658464 | 119709649 | Xq24     | Cullin-4B                                                                     |
| CXADR     | 18884700  | 18965897  | 21q21.1  | Coxsackievirus and adenovirus receptor                                        |
| CXCL1     | 74735110  | 74736959  | 4q13.3   | Growth-regulated alpha protein                                                |
| CXCL10    | 76942273  | 76944650  | 4q21.1   | C-X-C motif chemokine 10                                                      |
| CXCL11    | 76954835  | 76962568  | 4q21.1   | C-X-C motif chemokine 11                                                      |
| CXCL2     | 74962752  | 74965010  | 4q13.3   | C-X-C motif chemokine 2                                                       |
| CXCL5     | 74861359  | 74864496  | 4q13.3   | C-X-C motif chemokine 5                                                       |
| CXCL6     | 74702214  | 74714781  | 4q13.3   | C-X-C motif chemokine 6                                                       |
| CXCR3     | 70835766  | 70838367  | Xq13.1   | C-X-C chemokine receptor type 3                                               |
| CXorf20   | 18181051  | 18239024  | Xp22.13  | BEN domain-containing protein 2                                               |
| CXXC5     | 139026884 | 139063467 | 5q31.2   | CXXC-type zinc finger protein 5                                               |
| CYBA      | 88709691  | 88717560  | 16q24.3  | Cytochrome b-245 light chain                                                  |
| CYC1      | 145149930 | 145152428 | 8q24.3   | Cytochrome c1, heme protein, mitochondrial                                    |
| CycA1     |           |           |          |                                                                               |
| CycB1     |           |           |          |                                                                               |
| CycB2     |           |           |          |                                                                               |
| CYCD1     |           |           |          |                                                                               |
| CycE2     | 95891998  | 95908906  | 8q22.1   | G1/S-specific cyclin-E2                                                       |
| CYCS      | 25159710  | 25164980  | 7p15.3   | Cytochrome c                                                                  |
| CYFIP2    | 156693089 | 156822606 | 5q33.3   | Cytoplasmic FMR1-interacting protein 2                                        |
| CYP11A1   | 74630100  | 74660081  | 15q24.1  | Cholesterol side-chain cleavage enzyme, mitochondrial                         |
| CYP1A1    | 75011883  | 75017951  | 15q24.1  | Cytochrome P450 1A1                                                           |
| CYP2C8    | 96796530  | 96829254  | 10q23.33 | Cytochrome P450 2C8                                                           |
| CYP4B1    | 47223510  | 47285085  | 1p33     | Cytochrome P450 4B1                                                           |
| CYP4F11   | 16023177  | 16045677  | 19p13.12 | Phylloquinone omega-hydroxylase CYP4F11                                       |
| CYR61     | 86046444  | 86049645  | 1p22.3   | Protein CYR61                                                                 |
| D21S2056E | 45209394  | 45225174  | 21q22.3  | Ribosomal RNA processing protein 1 homolog A                                  |
| DAD1      | 23033805  | 23058175  | 14q11.2  | Dolichyl-diphosphooligosaccharide--protein glycosyltransferase subunit DAD1   |
| DAPP1     | 100737990 | 100791311 | 4q23     | Dual adapter for phosphotyrosine and 3-phosphotyrosine and 3-phosphoinositide |
| DARC      | 159173097 | 159176290 | 1q23.2   | Atypical chemokine receptor 1                                                 |

|              |            |            |          |                                                                                           |
|--------------|------------|------------|----------|-------------------------------------------------------------------------------------------|
| DC2          | 52558386   | 52569070   | 3p21.1   | 5'-nucleotidase domain-containing protein 2                                               |
| DCBLD2       | 98514785   | 98620533   | 3q12.1   | Discoidin, CUB and LCCL domain-containing protein 2                                       |
| DCC1         | 120846216  | 120868250  | 8q24.12  | Sister chromatid cohesion protein DCC1                                                    |
| DCK          | 71858255   | 71896631   | 4q13.3   | Deoxycytidine kinase                                                                      |
| DCN          | 91539025   | 91576900   | 12q21.33 | Decorin                                                                                   |
| DCP1A        | 53317447   | 53381654   | 3p21.1   | mRNA-decapping enzyme 1A                                                                  |
| DCT          | 95089558   | 95131936   | 13q32.1  | L-dopachrome tautomerase                                                                  |
| DCTN3        | 34613548   | 34620515   | 9p13.3   | Dynactin subunit 3                                                                        |
| DDOST        | 20978270   | 20988000   | 1p36.12  | Dolichyl-diphosphooligosaccharide--protein glycosyltransferase 48 kDa subunit             |
| DDT          | 24313554   | 24322660   | 22q11.23 | D-dopachrome decarboxylase                                                                |
| DDX21        | 70715884   | 70744829   | 10q22.1  | Nucleolar RNA helicase 2                                                                  |
| DDX23        | 49223547   | 49246625   | 12q13.12 | Probable ATP-dependent RNA helicase DDX23                                                 |
| DDX24        | 94517266   | 94547591   | 14q32.12 | ATP-dependent RNA helicase DDX24                                                          |
| DDX39        | 14519631   | 14530192   | 19p13.12 | ATP-dependent RNA helicase DDX39A                                                         |
| DDX50        | 70661034   | 70706603   | 10q22.1  | ATP-dependent RNA helicase DDX50                                                          |
| DDX56        | 44605016   | 44614650   | 7p13     | Probable ATP-dependent RNA helicase DDX56                                                 |
| DES          | 220283099  | 220291461  | 2q35     | Desmin                                                                                    |
| DGAT1        | 145539954  | 145550573  | 8q24.3   | Diacylglycerol O-acyltransferase 1                                                        |
| DHCR24       | 55315306   | 55352891   | 1p32.3   | Delta(24)-sterol reductase                                                                |
| DHFR         | 79922047   | 79950802   | 5q14.1   | Dihydrofolate reductase                                                                   |
| DHRS3        | 12627939   | 12677737   | 1p36.22  | Short-chain dehydrogenase/reductase 3                                                     |
| DHRSX        | 2137557    | 2420846    | Xp22.33  | Dehydrogenase/reductase SDR family member on chromosome X                                 |
| DHX16        | 30620896   | 30640814   | 6p21.33  | Putative pre-mRNA-splicing factor ATP-dependent RNA helicase DHX16                        |
| DHX32        | 127524906  | 127585005  | 10q26.2  | Putative pre-mRNA-splicing factor ATP-dependent RNA helicase DHX32                        |
| DIABLO       | 122692210  | 122712081  | 12q24.31 | Diablo homolog, mitochondrial                                                             |
| DIDO1        | 61509090   | 61569304   | 20q13.33 | Death-inducer obliterator 1                                                               |
| DIRAS3       | 68511645   | 68517314   | 1p31.3   | GTP-binding protein Di-Ras3                                                               |
| DKC1         | 153991031  | 154005964  | Xq28     | H/ACA ribonucleoprotein complex subunit 4                                                 |
| DKFZP564B147 | 134184962  | 134186226  | Xq26.3   | Protein FAM127B                                                                           |
| DKK3         | 11984653   | 12031316   | 11p15.3  | Dickkopf-related protein 3                                                                |
| DLAT         | 111895538  | 111935114  | 11q23.1  | Dihydrolipoyllysine-residue acetyltransferase component of pyruvate dehydrogenase complex |
| DMAP1        | 44679127   | 44686353   | 1p34.1   | DNA methyltransferase 1-associated protein 1                                              |
| DNAJB1       | 14625582   | 14640582   | 19p13.12 | DnaJ homolog subfamily B member 1                                                         |
| DNAJB4       | 78444859   | 78483648   | 1p31.1   | DnaJ homolog subfamily B member 4                                                         |
| DNAJB9       | 108210012  | 108215294  | 7q31.1   | DnaJ homolog subfamily B member 9                                                         |
| DNAJC7       | 40128451   | 40173394   | 17q21.2  | DnaJ homolog subfamily C member 7                                                         |
| DNASE1       | 3661729    | 3730144    | 16p13.3  | Deoxyribonuclease-1                                                                       |
| DNASE1L3     | 58177984   | 58200424   | 3p14.3   | Deoxyribonuclease gamma                                                                   |
| DNM1L        | 32832134   | 32898486   | 12p11.21 | Dynammin-1-like protein                                                                   |
| DNPEP        | 220238268  | 220264744  | 2q35     | Aspartyl aminopeptidase                                                                   |
| DNTT         | 98064085   | 98098321   | 10q24.1  | DNA nucleotidylexotransferase                                                             |
| DOC-1R       | 67,506,490 | 67,508,728 | 11q13.2  | Cyclin-Dependent Kinase 2 Associated Protein 2                                            |
| DOK4         | 57505863   | 57521239   | 16q21    | Docking protein 4                                                                         |
| DOM3Z        | 31937587   | 31940069   | 6p21.33  | Decapping and exoribonuclease protein                                                     |
| DPM2         | 130697378  | 130700763  | 9q34.11  | Dolichol phosphate-mannose biosynthesis regulatory protein                                |
| DPP7         | 140004994  | 140009629  | 9q34.3   | Dipeptidyl peptidase 2                                                                    |
| DPP9         | 4675236    | 4724685    | 19p13.3  | Dipeptidyl peptidase 9                                                                    |
| DPPA4        | 109044988  | 109056419  | 3q13.13  | Developmental pluripotency-associated protein 4                                           |

|        |           |           |          |                                                                 |
|--------|-----------|-----------|----------|-----------------------------------------------------------------|
| DRD2   | 113280318 | 113346413 | 11q23.2  | D(2) dopamine receptor                                          |
| DRD5   | 9783258   | 9785632   | 4p16.1   | D(1B) dopamine receptor                                         |
| DRG1   | 31795509  | 31924726  | 22q12.2  | Developmentally-regulated GTP-binding protein 1                 |
| DSCR2  | 40546695  | 40555777  | 21q22.2  | Proteasome assembly chaperone 1                                 |
| DSTN   | 17550508  | 17590564  | 20p12.1  | Destrin                                                         |
| DTX2   | 76090993  | 76135312  | 7q11.23  | Probable E3 ubiquitin-protein ligase DTX2                       |
| DTYMK  | 242615157 | 242626406 | 2q37.3   | Thymidylate kinase                                              |
| DUSP11 | 73989311  | 74007284  | 2p13.1   | RNA/RNP complex-1-interacting phosphatase                       |
| DUSP12 | 161719548 | 161727028 | 1q23.3   | Dual specificity protein phosphatase 12                         |
| DUSP13 | 76854192  | 76868979  | 10q22.2  | Dual specificity protein phosphatase 13 isoform A               |
| DUSP14 | 35849937  | 35873603  | 17q12    | Dual specificity protein phosphatase 14                         |
| DUSP19 | 183943287 | 183964733 | 2q32.1   | Dual specificity protein phosphatase 19                         |
| DUSP22 | 291630    | 351355    | 6p25.3   | Dual specificity protein phosphatase 22                         |
| DUSP6  | 89741009  | 89747048  | 12q21.33 | Dual specificity protein phosphatase 6                          |
| DUT    | 48623208  | 48635570  | 15q21.1  | Deoxyuridine 5'-triphosphate nucleotidohydrolase, mitochondrial |
| DVL3   | 183873176 | 183891398 | 3q27.1   | Segment polarity protein dishevelled homolog DVL-3              |
| DYNLT1 | 159057506 | 159065771 | 6q25.3   | Dynein light chain Tctex-type 1                                 |
| DYRK1B | 40315990  | 40324841  | 19q13.2  | Dual specificity tyrosine-phosphorylation-regulated kinase 1B   |
| DYRK4  | 4671370   | 4723325   | 12p13.32 | Dual specificity tyrosine-phosphorylation-regulated kinase 4    |
| EBAG9  | 110551940 | 110578225 | 8q23.2   | Receptor-binding cancer antigen expressed on SiSo cells         |
| EBI2   | 99946784  | 99959659  | 13q32.3  | G-protein coupled receptor 183                                  |
| EBP    | 48379546  | 48387104  | Xp11.23  | 3-beta-hydroxysteroid-Delta(8),Delta(7)-isomerase               |
| ECGF1  | 50964181  | 50968485  | 22q13.33 | Thymidine phosphorylase                                         |
| ECM1   | 150480538 | 150486265 | 1q21.3   | Extracellular matrix protein 1                                  |
| ECRG4  | 106679702 | 106694615 | 2q12.2   | Augurin                                                         |
| EDEM1  | 5229331   | 5261642   | 3p26.1   | ER degradation-enhancing alpha-mannosidase-like protein 1       |
| EDF1   | 139756571 | 139760738 | 9q34.3   | Endothelial differentiation-related factor 1                    |
| EDG1   | 101702444 | 101707074 | 1p21.2   | Sphingosine 1-phosphate receptor 1                              |
| EDG3   | 91606362  | 91619925  | 9q22.1   | Sphingosine 1-phosphate receptor 3                              |
| EEF1A1 | 74225473  | 74233520  | 6q13     | Elongation factor 1-alpha 1                                     |
| EEF1A2 | 62119366  | 62130505  | 20q13.33 | Elongation factor 1-alpha 2                                     |
| EEFSEC | 127872297 | 128127485 | 3q21.3   | Selenocysteine-specific elongation factor                       |
| EFEMP1 | 56093102  | 56151274  | 2p16.1   | EGF-containing fibulin-like extracellular matrix protein 1      |
| EFNB1  | 68048840  | 68061990  | Xq13.1   | Ephrin-B1                                                       |
| EFTUD2 | 42927311  | 42977030  | 17q21.31 | 116 kDa U5 small nuclear ribonucleoprotein component            |
| EHD2   | 48216600  | 48246391  | 19q13.33 | EH domain-containing protein 2                                  |
| EHD4   | 42190950  | 42264776  | 15q15.1  | EH domain-containing protein 4                                  |
| EI24   | 125439112 | 125454575 | 11q24    | Etoposide-induced protein 2.4 homolog                           |
| EIF1   | 39845137  | 39848920  | 17q21.2  | Eukaryotic translation initiation factor 1                      |
| EIF2A  | 150264465 | 150302029 | 3q25.1   | Eukaryotic translation initiation factor 2A                     |
| EIF2B2 | 75469614  | 75476292  | 14q24.3  | Translation initiation factor eIF-2B subunit beta               |
| EIF2S3 | 24072833  | 24096088  | Xp22.11  | Eukaryotic translation initiation factor 2 subunit 3            |
| EIF3S2 | 32687529  | 32697205  | 1p35.1   | Eukaryotic translation initiation factor 3 subunit I            |
| EIF3S3 | 117654369 | 117779164 | 8q23.3   | Eukaryotic translation initiation factor 3 subunit H            |
| EIF3S6 | 109213445 | 109447562 | 8q23.1   | Eukaryotic translation initiation factor 3 subunit E            |
| EIF3S7 | 36906897  | 36925483  | 22q12.3  | Eukaryotic translation initiation factor 3 subunit D            |
| EIF3S8 | 28390900  | 28415200  | 16p11.2  | Eukaryotic translation initiation factor 3 subunit C            |

|           |             |             |          |                                                                     |
|-----------|-------------|-------------|----------|---------------------------------------------------------------------|
| EIF4A1    | 7476024     | 7482323     | 17p13.1  | Eukaryotic initiation factor 4A-I                                   |
| EIF4E     | 99792835    | 99851788    | 4q23     | Eukaryotic translation initiation factor 4E                         |
| EIF4ENIF1 | 31832963    | 31892094    | 22q12.2  | Eukaryotic translation initiation factor 4E trans-<br>porter        |
| EIF5A     | 7210318     | 7215774     | 17p13.1  | Eukaryotic translation initiation factor 5A-1                       |
| ELA3A     | 22303514    | 22325135    | 1p36.12  | Chymotrypsin-like elastase family member 3B                         |
| ELAC1     | 48494361    | 48514491    | 18q21.2  | Zinc phosphodiesterase ELAC protein 1                               |
| ELAVL2    | 23690102    | 23826335    | 9p21.3   | ELAV-like protein 2                                                 |
| ELF3      | 201977073   | 201986316   | 1q32.1   | ETS-related transcription factor Elf-3                              |
| ELF5      | 34500340    | 34535352    | 11p13    | ETS-related transcription factor Elf-5                              |
| ELK1      | 47494920    | 47510003    | Xp11.23  | ETS domain-containing protein Elk-1                                 |
| ELL2      | 95220802    | 95297775    | 5q15     | RNA polymerase II elongation factor ELL2                            |
| ELP4      | 31531297    | 31805546    | 11p13    | Elongator complex protein 4                                         |
| EML1      | 100204030   | 100408397   | 14q32.2  | Echinoderm microtubule-associated protein-like 1                    |
| EMP1      | 13349650    | 13369708    | 12p13.1  | Epithelial membrane protein 1                                       |
| ENG       | 130577291   | 130617035   | 9q34.11  | Endoglin                                                            |
| ENO1      | 8921061     | 8939308     | 1p36.23  | Alpha-enolase                                                       |
| ENO3      | 4851387     | 4860426     | 17p13.2  | Beta-enolase                                                        |
| ENPP2     | 120569326   | 120685693   | 8q24.12  | Ectonucleotide pyrophosphatase/phosphodiesterase<br>family member 2 |
| ENSA      | 150573327   | 150602088   | 1q21.3   | Alpha-endosulfine                                                   |
| ENTPD2    | 139942550   | 139948497   | 9q34.3   | Ectonucleoside triphosphate diphosphohydrolase 2                    |
| EPB49     | 21906506    | 21940038    | 8p21.3   | Dematin                                                             |
| EPHA2     | 16450832    | 16482582    | 1p36.13  | Ephrin type-A receptor 2                                            |
| EPHX1     | 225997794   | 226033260   | 1q42.12  | Epoxide hydrolase 1                                                 |
| EPHX2     | 27348296    | 27403081    | 8p21.1   | Bifunctional epoxide hydrolase 2                                    |
| EPS8      | 15773092    | 16035263    | 12p12.3  | Epidermal growth factor receptor kinase substrate 8                 |
| EPSTI1    | 43460524    | 43566407    | 13q14.11 | Epithelial-stromal interaction protein 1                            |
| ERAL1     | 27181956    | 27188085    | 17q11.2  | GTPase Era, mitochondrial                                           |
| ERCC1     | 45910591    | 45982086    | 19q13.32 | DNA excision repair protein ERCC-1                                  |
| ERCC5     | 103497194   | 103528345   | 13q33.1  | DNA repair protein complementing XP-G cells                         |
| EREG      | 75230860    | 75254468    | 4q13.3   | Proepiregulin                                                       |
| ERF       | 42751724    | 42759309    | 19q13.2  | ETS domain-containing transcription factor ERF                      |
| ESAM      | 124622026   | 124632186   | 11q24.2  | Endothelial cell-selective adhesion molecule                        |
| ET        | 128,458,761 | 128,587,558 | 11q24.3  | V-Ets Avian Erythroblastosis Virus E26 Oncogene<br>Homolog 1        |
| ETR101    | 13261229    | 13265722    | 19p13.2  | Immediate early response gene 2 protein                             |
| ETS1      | 128328656   | 128457453   | 11q24.3  | Protein C-ets-1                                                     |
| ETS2      | 40177231    | 40196879    | 21q22.2  | Protein C-ets-2                                                     |
| ETV3      | 157090983   | 157108266   | 1q23.1   | ETS translocation variant 3                                         |
| EXDL1     | 41474923    | 41522941    | 15q15.1  | Exonuclease 3'-5' domain-containing protein 1                       |
| EXOD1     | 20791515    | 20911671    | 16p12.3  | ERI1 exoribonuclease 2                                              |
| EXOSC3    | 37766975    | 37801434    | 9p13.2   | Exosome complex component RRP40                                     |
| F2R       | 76011868    | 76031606    | 5q13.3   | Proteinase-activated receptor 1                                     |
| F3        | 94994781    | 95007356    | 1p21.3   | Tissue factor                                                       |
| FABP1     | 88422510    | 88427635    | 2p11.2   | Fatty acid-binding protein, liver                                   |
| FABP3     | 31838472    | 31849697    | 1p35.2   | Fatty acid-binding protein, heart                                   |
| FABP7     | 123100620   | 123105219   | 6q22.31  | Fatty acid-binding protein, brain                                   |
| FAIM      | 138327448   | 138352218   | 3q22.3   | Fas apoptotic inhibitory molecule 1                                 |
| FAM103A1  | 83654959    | 83659809    | 15q25.2  | RNMT-activating mini protein                                        |
| FAM107A   | 58549844    | 58613337    | 3p14.2   | Protein FAM107A                                                     |
| FAM13C1   | 61005890    | 61122939    | 10q21.1  | Protein FAM13C                                                      |
| FAM48A    | 37583449    | 37633850    | 13q13.3  | Transcription factor SPT20 homolog                                  |
| FAM76B    | 95502106    | 95523573    | 11q21    | Protein FAM76B                                                      |
| FAP       | 163027194   | 163101661   | 2q24.2   | Prolyl endopeptidase FAP                                            |

|         |           |           |          |                                                           |
|---------|-----------|-----------|----------|-----------------------------------------------------------|
| FARS1   | 5261277   | 5771813   | 6p25.1   | Phenylalanine--tRNA ligase, mitochondrial                 |
| FAS     | 90750414  | 90775542  | 10q23.31 | Tumor necrosis factor receptor superfamily member 6       |
| FASLG   | 172628154 | 172636014 | 1q24.3   | Tumor necrosis factor ligand superfamily member 6         |
| FATE1   | 150884507 | 150891666 | Xq28     | Fetal and adult testis-expressed transcript protein       |
| FBL     | 40325098  | 40337054  | 19q13.2  | rRNA 2'-O-methyltransferase fibrillarin                   |
| FBXL13  | 102453308 | 102715286 | 7q22.1   | F-box/LRR-repeat protein 13                               |
| FBXL5   | 15606162  | 15683302  | 4p15.32  | F-box/LRR-repeat protein 5                                |
| FBXL8   | 67193834  | 67198473  | 16q22.1  | F-box/LRR-repeat protein 8                                |
| FBXO2   | 11708424  | 11715842  | 1p36.22  | F-box only protein 2                                      |
| FBXO5   | 153291664 | 153304714 | 6q25.2   | F-box only protein 5                                      |
| FBXW11  | 171288553 | 171433877 | 5q35.1   | F-box/WD repeat-containing protein 11                     |
| FBXW2   | 123514256 | 123555690 | 9q33.2   | F-box/WD repeat-containing protein 2                      |
| FCGR2A  | 161475220 | 161493803 | 1q23.3   | Low affinity immunoglobulin gamma Fc region receptor II-a |
| FCN1    | 137801431 | 137809809 | 9q34.3   | Ficolin-1                                                 |
| FCN3    | 27695603  | 27701315  | 1p36.11  | Ficolin-3                                                 |
| FCRL3   | 157644111 | 157670647 | 1q23.1   | Fc receptor-like protein 3                                |
| FCRLM1  | 161676762 | 161684142 | 1q23.3   | Fc receptor-like A                                        |
| FDPS    | 155278539 | 155290457 | 1q22     | Farnesyl pyrophosphate synthase                           |
| FEM1C   | 114856608 | 114880591 | 5q22.3   | Protein fem-1 homolog C                                   |
| FEN1    | 61560109  | 61564716  | 11q12.2  | Flap endonuclease 1                                       |
| FEV     | 219845809 | 219850379 | 2q35     | Protein FEV                                               |
| FFAR3   | 35849362  | 35851387  | 19q13.12 | Free fatty acid receptor 3                                |
| FGD2    | 36973422  | 36996846  | 6p21.2   | FYVE, RhoGEF and PH domain-containing protein 2           |
| FGF10   | 44303646  | 44389808  | 5p12     | Fibroblast growth factor 10                               |
| FGF13   | 137713735 | 138304939 | Xq26.3   | Fibroblast growth factor 13                               |
| FGF16   | 76709648  | 76712769  | Xq21.1   | Fibroblast growth factor 16                               |
| FGF18   | 170846660 | 170884627 | 5q35.1   | Fibroblast growth factor 18                               |
| FGF21   | 49258816  | 49261587  | 19q13.33 | Fibroblast growth factor 21                               |
| FGF7    | 49715293  | 49780972  | 15q21.2  | Fibroblast growth factor 7                                |
| FGFR1   | 38268656  | 38326352  | 8p11.22  | Fibroblast growth factor receptor 1                       |
| FGFR1OP | 167412670 | 167466201 | 6q27     | FGFR1 oncogene partner                                    |
| FGFR4   | 176513887 | 176525145 | 5q35.2   | Fibroblast growth factor receptor 4                       |
| FGFRL1  | 1003724   | 1020685   | 4p16.3   | Fibroblast growth factor receptor-like 1                  |
| FHIT    | 59735036  | 61237133  | 3p14.2   | Bis(5'-adenosyl)-triphosphatase                           |
| FHL2    | 105974169 | 106054970 | 2q12.1   | Four and a half LIM domains protein 2                     |
| FHL3    | 38462442  | 38471278  | 1p34.3   | Four and a half LIM domains protein 3                     |
| FHL5    | 97010424  | 97064512  | 6q16.1   | Four and a half LIM domains protein 5                     |
| FKBP10  | 39968932  | 39979465  | 17q21.2  | Peptidyl-prolyl cis-trans isomerase FKBP10                |
| FKBP14  | 30050203  | 30066300  | 7p14.3   | Peptidyl-prolyl cis-trans isomerase FKBP14                |
| FKBP3   | 45584803  | 45604522  | 14q21.2  | Peptidyl-prolyl cis-trans isomerase FKBP3                 |
| FKBP4   | 2904119   | 2914576   | 12p13.33 | Peptidyl-prolyl cis-trans isomerase FKBP4                 |
| FKBP5   | 35541362  | 35696360  | 6p21.31  | Peptidyl-prolyl cis-trans isomerase FKBP5                 |
| FKBP8   | 18642561  | 18654887  | 19p13.11 | Peptidyl-prolyl cis-trans isomerase FKBP8                 |
| FKBPL   | 32096484  | 32098068  | 6p21.33  | FK506-binding protein-like                                |
| FKHL18  | 30432103  | 30433420  | 20q11.21 | Forkhead box protein S1                                   |
| FKRP    | 47249303  | 47280245  | 19q13.32 | Fukutin-related protein                                   |
| FLI1    | 128556430 | 128683162 | 11q24.3  | Friend leukemia integration 1 transcription factor        |
| FLOT2   | 27206353  | 27224697  | 17q11.2  | Flotillin-2                                               |
| FLRT3   | 14303634  | 14318262  | 20p12.1  | Leucine-rich repeat transmembrane protein FLRT3           |
| FMO3    | 171060018 | 171086959 | 1q24.3   | Dimethylaniline monooxygenase [N-oxide-forming] 3         |
| FN1     | 216225163 | 216300895 | 2q35     | Fibronectin                                               |

|           |            |            |              |                                                             |
|-----------|------------|------------|--------------|-------------------------------------------------------------|
| FOLH1     | 49168187   | 49230222   | 11p11.12     | Glutamate carboxypeptidase 2                                |
| FOLR1     | 71900602   | 71907345   | 11q13.4      | Folate receptor alpha                                       |
| FOS       | 75745477   | 75748933   | 14q24.3      | Proto-oncogene c-Fos                                        |
| FOSB      | 45971253   | 45978437   | 19q13.32     | Protein fosB                                                |
| FOSL1     | 65659520   | 65668044   | 11q13.1      | Fos-related antigen 1                                       |
| FOSL2     | 28615315   | 28640179   | 2p23.2       | Fos-related antigen 2                                       |
| FRAT2     | 99092255   | 99094458   | 10q24.1      | GSK-3-binding protein FRAT2                                 |
| FRK       | 116252312  | 116381921  | 6q22.1       | Tyrosine-protein kinase FRK                                 |
| FSCN1     | 5632439    | 5646286    | 7p22.1       | Fascin                                                      |
| FST       | 52776239   | 52782964   | 5q11.2       | Follistatin                                                 |
| FTH1      | 61727190   | 61735132   | 11q12.3      | Ferritin heavy chain                                        |
| FTL       | 49468558   | 49470135   | 19q13.33     | Ferritin light chain                                        |
| FTSJ3     | 61896793   | 61907372   | 17q23.3      | pre-rRNA processing protein FTSJ3                           |
| FUBP1     | 78409740   | 78444794   | 1p31.1       | Far upstream element-binding protein 1                      |
| FUT11     | 75532049   | 75540009   | 10q22.2      | Alpha-(1,3)-fucosyltransferase 11                           |
| FXYP2     | 117671559  | 117699413  | 11q23.3      | Sodium/potassium-transporting ATPase subunit gamma          |
| FXYP7     | 35634154   | 35645204   | 19q13.12     | FXYP domain-containing ion transport regulator 7            |
| G0S2      | 209848765  | 209849733  | 1q32.2       | G0/G1 switch protein 2                                      |
| G1P2      | 948803     | 949920     | 1p36.33      | Ubiquitin-like protein ISG15                                |
| G3BP      | 151150606  | 151192346  | 5q33.1       | Ras GTPase-activating protein-binding protein 1             |
| GABARAP   | 7143333    | 7146089    | 17p13.1      | Gamma-aminobutyric acid receptor-associated protein         |
| GABRA3    | 151334706  | 151619830  | Xq28         | Gamma-aminobutyric acid receptor subunit alpha-3            |
| GADD45A   | 68150744   | 68154021   | 1p31.3       | Growth arrest and DNA damage-inducible protein GADD45 alpha |
| GAGE2     | 49354132   | 49361430   | Xp11.23      | G antigen 2A                                                |
| GAGE4     | -          | -          | Xp11.2-p11.4 | G antigen 4                                                 |
| GAGEB1    | 49452053   | 49460596   | Xp11.23      | P antigen family member 1                                   |
| GAL3ST1   | 30950622   | 30970574   | 22q12.2      | Galactosylceramide sulfotransferase                         |
| GALC      | 88304164   | 88460009   | 14q31.3      | Galactocerebrosidase                                        |
| GALE      | 24122089   | 24127271   | 1p36.11      | UDP-glucose 4-epimerase                                     |
| GALNACT-2 | 43633934   | 43680756   | 10q11.21     | Chondroitin sulfate N-acetylgalactosaminyltransferase 2     |
| GALNT6    | 51745031   | 51786651   | 12q13.13     | Polypeptide N-acetylgalactosaminyltransferase 6             |
| GAP43     | 115342171  | 115440337  | 3q13.31      | Neuromodulin                                                |
| GAPDH     | 6643093    | 6647537    | 12p13.31     | Glyceraldehyde-3-phosphate dehydrogenase                    |
| GARS      | 30634297   | 30673649   | 7p14.3       | Glycine--tRNA ligase                                        |
| GAS7      | 9813926    | 10101868   | 17p13.1      | Growth arrest-specific protein 7                            |
| GATA3     | 8095567    | 8117161    | 10p14        | Trans-acting T-cell-specific transcription factor GATA-3    |
| GBAS      | 56019486   | 56067874   | 7p11.2       | Protein NipSnap homolog 2                                   |
| GBL       | 27265232   | 27293490   | 2p23.3       | Cytosolic carboxypeptidase-like protein 5                   |
| GBP5      | 89724633   | 89738544   | 1p22.2       | Guanylate-binding protein 5                                 |
| GC20      | 40351175   | 40353915   | 3p22.1       | Eukaryotic translation initiation factor 1b                 |
| GCG       | 162999392  | 163008914  | 2q24.2       | Glucagon                                                    |
| GCH1      | 55308726   | 55369570   | 14q22.2      | GTP cyclohydrolase 1                                        |
| GCLM      | 94350761   | 94374966   | 1p22.1       | Glutamate--cysteine ligase regulatory subunit               |
| GDB       | 138824815  | 138853226  | 9q34.3       | Ubiquitin-associated domain-containing protein 1            |
| GDBR1     |            |            |              |                                                             |
| GDEP      | 79,827,471 | 79,877,770 | 4q21.21      | Prostate Cancer Associated Transcript 4                     |
| GDF3      | 7842378    | 7848372    | 12p13.31     | Growth/differentiation factor 3                             |
| GDNF      | 37812779   | 37839788   | 5p13.2       | Glial cell line-derived neurotrophic factor                 |
| GENX-3414 | 77172886   | 77232752   | 4q21.1       | Starch-binding domain-containing protein 1                  |
| GFI1      | 92940319   | 92952433   | 1p22.1       | Zinc finger protein Gfi-1                                   |

|         |           |           |          |                                                                    |
|---------|-----------|-----------|----------|--------------------------------------------------------------------|
| GGA2    | 23474863  | 23533316  | 16p12.2  | ADP-ribosylation factor-binding protein GGA2                       |
| GGN     | 38874905  | 38878722  | 19q13.2  | Gametogenetin                                                      |
| GGT1    | 24979718  | 25024972  | 22q11.23 | Gamma-glutamyltranspeptidase 1                                     |
| GH2     | 61957578  | 61959295  | 17q23.3  | Growth hormone variant                                             |
| GIF     | 59596741  | 59612974  | 11q12.1  | Gastric intrinsic factor                                           |
| GIPC1   | 14588572  | 14606944  | 19p13.12 | PDZ domain-containing protein GIPC1                                |
| GJA1    | 121756838 | 121770873 | 6q22.31  | Gap junction alpha-1 protein                                       |
| GJA5    | 147228332 | 147245484 | 1q21.2   | Gap junction alpha-5 protein                                       |
| GJB1    | 70435044  | 70445366  | Xq13.1   | Gap junction beta-1 protein                                        |
| GJB2    | 20761609  | 20767037  | 13q12.11 | Gap junction beta-2 protein                                        |
| GK      | 30671476  | 30748725  | Xp21.2   | Glycerol kinase                                                    |
| GLRX    | 95087023  | 95158709  | 5q15     | Glutaredoxin-1                                                     |
| GLTSCR2 | 48248779  | 48260315  | 19q13.33 | Glioma tumor suppressor candidate region gene 2 protein            |
| GLUL    | 182350839 | 182361341 | 1q25.3   | Glutamine synthetase                                               |
| GLYAT   | 58407899  | 58499447  | 11q12.1  | Glycine N-acyltransferase                                          |
| GM2A    | 150591711 | 150650001 | 5q33.1   | Ganglioside GM2 activator                                          |
| GMD5    | 1624041   | 2245926   | 6p25.3   | GDP-mannose 4,6 dehydratase                                        |
| GMFB    | 54941202  | 54955914  | 14q22.2  | Glia maturation factor beta                                        |
| GMFG    | 39818993  | 39833012  | 19q13.2  | Glia maturation factor gamma                                       |
| GNAI3   | 63006833  | 63052957  | 17q24.1  | Guanine nucleotide-binding protein subunit alpha-13                |
| GNAI2   | 50263724  | 50296787  | 3p21.31  | Guanine nucleotide-binding protein G(i) subunit alpha-2            |
| GNAI3   | 110091233 | 110136975 | 1p13.3   | Guanine nucleotide-binding protein G(k) subunit alpha              |
| GNAT2   | 110145889 | 110155679 | 1p13.3   | Guanine nucleotide-binding protein G(t) subunit alpha-2            |
| GNB2L1  | 180663909 | 180675096 | 5q35.3   | Guanine nucleotide-binding protein subunit beta-2-like 1           |
| GNB3    | 6949118   | 6956557   | 12p13.31 | Guanine nucleotide-binding protein G(I)/G(S)/G(T) subunit beta-3   |
| GNG10   | 114423615 | 114432526 | 9q31.3   | Guanine nucleotide-binding protein G(I)/G(S)/G(O) subunit gamma-10 |
| GNG11   | 93551011  | 93557922  | 7q21.3   | Guanine nucleotide-binding protein G(I)/G(S)/G(O) subunit gamma-11 |
| GNG3    | 62475130  | 62476673  | 11q12.3  | Guanine nucleotide-binding protein G(I)/G(S)/G(O) subunit gamma-3  |
| GNGT1   | 93220885  | 93540577  | 7q21.3   | Guanine nucleotide-binding protein G(T) subunit gamma-T1           |
| GNL1    | 30509154  | 30524951  | 6p21.33  | Guanine nucleotide-binding protein-like 1                          |
| GNLY    | 85912298  | 85925977  | 2p11.2   | Granulysin                                                         |
| GNRH1   | 25276776  | 25282170  | 8p21.2   | Progonadoliberin-1                                                 |
| GORASP2 | 171784974 | 171823639 | 2q31.1   | Golgi reassembly-stacking protein 2                                |
| GOSR2   | 45000483  | 45105003  | 17q21.32 | Golgi SNAP receptor complex member 2                               |
| GPBP1L1 | 46092976  | 46153785  | 1p34.1   | Vasculin-like protein 1                                            |
| GPC3    | 132669773 | 133119922 | Xq26.2   | Glypican-3                                                         |
| GPC4    | 132434131 | 132549518 | Xq26.2   | Glypican-4                                                         |
| GPHN    | 66974125  | 67648520  | 14q23.3  | Gephyrin                                                           |
| GPIAP1  | 34073230  | 34122703  | 11p13    | Caprin-1                                                           |
| GPM6B   | 13789150  | 13956757  | Xp22.2   | Neuronal membrane glycoprotein M6-b                                |
| GPR114  | 57576333  | 57625593  | 16q21    | Probable G-protein coupled receptor 114                            |
| GPR146  | 1084212   | 1098897   | 7p22.3   | Probable G-protein coupled receptor 146                            |
| GPR157  | 9160364   | 9189229   | 1p36.23  | Probable G-protein coupled receptor 157                            |
| GPR17   | 128403439 | 128410213 | 2q14.3   | Uracil nucleotide/cysteinyl leukotriene receptor                   |

|          |           |           |          |                                                                      |
|----------|-----------|-----------|----------|----------------------------------------------------------------------|
| GPR173   | 53078273  | 53109797  | Xp11.22  | Probable G-protein coupled receptor 173                              |
| GPR30    | 1121844   | 1133451   | 7p22.3   | G-protein coupled estrogen receptor 1                                |
| GPR4     | 46093022  | 46105466  | 19q13.32 | G-protein coupled receptor 4                                         |
| GPR41    | 35849362  | 35851387  | 19q13.12 | Free fatty acid receptor 3                                           |
| GPR55    | 231772033 | 231825781 | 2q37.1   | G-protein coupled receptor 55                                        |
| GPR84    | 54756229  | 54758271  | 12q13.13 | G-protein coupled receptor 84                                        |
| GPR92    | 6728001   | 6745613   | 12p13.31 | Lysophosphatidic acid receptor 5                                     |
| GPRC5C   | 72420990  | 72447792  | 17q25.1  | G-protein coupled receptor family C group 5 member C                 |
| GPSM2    | 109417972 | 109477167 | 1p13.3   | G-protein-signaling modulator 2                                      |
| GPSN2    | 14627897  | 14676792  | 19p13.12 | Very-long-chain enoyl-CoA reductase                                  |
| GRAP2    | 40297086  | 40369725  | 22q13.1  | GRB2-related adapter protein 2                                       |
| GRB2     | 73314157  | 73401790  | 17q25.1  | Growth factor receptor-bound protein 2                               |
| GRINL1A  | 57884231  | 58074960  | 15q21.3  | DNA-directed RNA polymerase II subunit GRINL1A                       |
| GRO1     | 74735110  | 74736959  | 4q13.3   | Growth-regulated alpha protein                                       |
| GRP      | 56887400  | 56898006  | 18q21.32 | Gastrin-releasing peptide                                            |
| GRPEL1   | 7060633   | 7069924   | 4p16.1   | GrpE protein homolog 1, mitochondrial                                |
| GRWD1    | 48949030  | 48960279  | 19q13.33 | Glutamate-rich WD repeat-containing protein 1                        |
| GSG1L    | 27798850  | 28074830  | 16p12.1  | Germ cell-specific gene 1-like protein                               |
| GSK3B    | 119540170 | 119813264 | 3q13.33  | Glycogen synthase kinase-3 beta                                      |
| GSS      | 33516236  | 33543620  | 20q11.22 | Glutathione synthetase                                               |
| GSTA3    | 52761437  | 52774483  | 6p12.2   | Glutathione S-transferase A3                                         |
| GSTP1    | 67351066  | 67354131  | 11q13.2  | Glutathione S-transferase P                                          |
| GSTT1    | 24376133  | 24384680  | 22q11.23 | Glutathione S-transferase theta-1                                    |
| GTF2A2   | 59930261  | 59949740  | 15q22.2  | Transcription initiation factor IIA subunit 2                        |
| GTF2H1   | 18343842  | 18388591  | 11p15.1  | General transcription factor IIH subunit 1                           |
| GTF2H4   | 30875961  | 30881883  | 6p21.33  | General transcription factor IIH subunit 4                           |
| GTF2IRD1 | 73868120  | 74016931  | 7q11.23  | General transcription factor II-I repeat domain-containing protein 1 |
| GTSE1    | 46692638  | 46726707  | 22q13.31 | G2 and S phase-expressed protein 1                                   |
| GUK1     | 228327663 | 228336685 | 1q42.13  | Guanylate kinase                                                     |
| GYLTL1B  | 45943172  | 45950647  | 11p11.2  | Glycosyltransferase-like protein LARGE2                              |
| GZMA     | 54398476  | 54406080  | 5q11.2   | Granzyme A                                                           |
| H2AFV    | 44866390  | 44887682  | 7p13     | Histone H2A.V                                                        |
| H2AFZ    | 100869243 | 100871545 | 4q23     | Histone H2A.Z                                                        |
| H3F3A    | 226249552 | 226259702 | 1q42.12  | Histone H3.3                                                         |
| HAAO     | 42994229  | 43019733  | 2p21     | 3-hydroxyanthranilate 3,4-dioxygenase                                |
| HACL1    | 15602211  | 15643338  | 3p25.1   | 2-hydroxyacyl-CoA lyase 1                                            |
| HADHA    | 26413504  | 26467594  | 2p23.3   | Trifunctional enzyme subunit alpha, mitochondrial                    |
| HADHB    | 26466038  | 26513336  | 2p23.3   | Trifunctional enzyme subunit beta, mitochondrial                     |
| HADHSC   | 108910870 | 108956331 | 4q25     | Hydroxyacyl-coenzyme A dehydrogenase, mitochondrial                  |
| HAGH     | 1845621   | 1877195   | 16p13.3  | Hydroxyacylglutathione hydrolase, mitochondrial                      |
| HAO2     | 119911402 | 119936753 | 1p12     | Hydroxyacid oxidase 2                                                |
| HAS1     | 52216365  | 52227247  | 19q13.41 | Hyaluronan synthase 1                                                |
| HAVCR1   | 156456424 | 156486130 | 5q33.3   | Hepatitis A virus cellular receptor 1                                |
| HBA2     | 222846    | 223709    | 16p13.3  | Hemoglobin subunit alpha                                             |
| HBB      | 5246694   | 5250625   | 11p15.4  | Hemoglobin subunit beta                                              |
| HBE1     | 5289582   | 5526847   | 11p15.4  | Hemoglobin subunit epsilon                                           |
| HBG1     | 5269313   | 5271122   | 11p15.4  | Hemoglobin subunit gamma-1                                           |
| HDAC1    | 32757687  | 32799236  | 1p35.1   | Histone deacetylase 1                                                |
| HDAC3    | 141000443 | 141016437 | 5q31.3   | Histone deacetylase 3                                                |
| HDGF     | 156711899 | 156736717 | 1q23.1   | Hepatoma-derived growth factor                                       |
| HES4     | 934342    | 935552    | 1p36.33  | Transcription factor HES-4                                           |

|           |           |           |          |                                                              |
|-----------|-----------|-----------|----------|--------------------------------------------------------------|
| HEXIM1    | 43224684  | 43229468  | 17q21.31 | Protein HEXIM1                                               |
| HGS       | 79650356  | 79670168  | 17q25.3  | Hepatocyte growth factor-regulated tyrosine kinase substrate |
| HHLA2     | 108015376 | 108097132 | 3q13.13  | HERV-H LTR-associating protein 2                             |
| HIBADH    | 27565061  | 27702614  | 7p15.2   | 3-hydroxyisobutyrate dehydrogenase, mitochondrial            |
| HIF1AN    | 102288829 | 102319755 | 10q24.31 | Hypoxia-inducible factor 1-alpha inhibitor                   |
| HIGD2A    | 175815748 | 175816772 | 5q35.2   | HIG1 domain family member 2A, mitochondrial                  |
| HIST1H2AC | 26124373  | 26139344  | 6p22.2   | Histone H2A type 1-C                                         |
| HIST1H2AM | 27860477  | 27860963  | 6p22.1   | Histone H2A type 1                                           |
| HIST1H3D  | 26197068  | 26199521  | 6p22.2   | Histone H3.1                                                 |
| HIST1H4F  | 26240561  | 26240976  | 6p22.2   | Histone H4                                                   |
| HIST2H2AA | 149822643 | 149823191 | 1q21.2   | Histone H2A type 2-A                                         |
| HIST3H3   | 228612546 | 228613026 | 1q42.13  | Histone H3.1t                                                |
| HK1       | 71029740  | 71161638  | 10q22.1  | Hexokinase-1                                                 |
| HK2       | 75061108  | 75120486  | 2p12     | Hexokinase-2                                                 |
| HLA-C     | 31226380  | 31229751  | 6p21.33  | HLA class I histocompatibility antigen, Cw-4 alpha chain     |
| HLA-DMB   | 32831136  | 32849631  | 6p21.32  | HLA class II histocompatibility antigen, DM beta chain       |
| HLA-DOB   | 32780540  | 32784825  | 6p21.32  | HLA class II histocompatibility antigen, DO beta chain       |
| HLA-DPA1  | 33032346  | 33048552  | 6p21.32  | HLA class II histocompatibility antigen, DP alpha 1 chain    |
| HLA-DQA1  | 32533367  | 32539589  | 6p21.32  | HLA class II histocompatibility antigen, DQ alpha 1 chain    |
| HLA-DQB1  | 32658022  | 32667070  | 6p21.32  | HLA class II histocompatibility antigen, DQ beta 1 chain     |
| HLA-DRA   | 32365090  | 32370300  | 6p21.32  | HLA class II histocompatibility antigen, DR alpha chain      |
| HLA-E     | 30446762  | 30451500  | 6p21.33  | HLA class I histocompatibility antigen, alpha chain E        |
| HLX1      | 221051699 | 221058401 | 1q41     | H2.0-like homeobox protein                                   |
| HM13      | 30102231  | 30157370  | 20q11.21 | Minor histocompatibility antigen H13                         |
| HMGB2     | 174252846 | 174256276 | 4q34.1   | High mobility group protein B2                               |
| HMGY      | 34204650  | 34214008  | 6p21.31  | High mobility group protein HMG-I/HMG-Y                      |
| HMOX1     | 35776354  | 35790207  | 22q12.3  | Heme oxygenase 1                                             |
| HMOX2     | 4524691   | 4560348   | 16p13.3  | Heme oxygenase 2                                             |
| HN1       | 73131343  | 73164376  | 17q25.1  | Hematological and neurological expressed 1 protein           |
| HNF4G     | 76320149  | 76479078  | 8q21.11  | Hepatocyte nuclear factor 4-gamma                            |
| HNMT      | 138721590 | 138773930 | 2q22.1   | Histamine N-methyltransferase                                |
| HOMER2    | 83509838  | 83654661  | 15q25.2  | Homer protein homolog 2                                      |
| HOMER3    | 19040010  | 19052070  | 19p13.11 | Homer protein homolog 3                                      |
| HOOK1     | 60280458  | 60342050  | 1p32.1   | Protein Hook homolog 1                                       |
| HOXA10    | 27210210  | 27219880  | 7p15.2   | Homeobox protein Hox-A10                                     |
| HOXA5     | 27180671  | 27183287  | 7p15.2   | Homeobox protein Hox-A5                                      |
| HOXA9     | 27202054  | 27210117  | 7p15.2   | Homeobox protein Hox-A9                                      |
| HOXB13    | 46802125  | 46806540  | 17q21.32 | Homeobox protein Hox-B13                                     |
| HOXB7     | 46684594  | 46710934  | 17q21.32 | Homeobox protein Hox-B7                                      |
| HOXD3     | 177001340 | 177037830 | 2q31.1   | Homeobox protein Hox-D3                                      |
| HPD       | 122277433 | 122301502 | 12q24.31 | 4-hydroxyphenylpyruvate dioxygenase                          |
| HPRT1     | 133594183 | 133654543 | Xq26.2   | Hypoxanthine-guanine phosphoribosyltransferase               |
| HRAS      | 532242    | 537287    | 11p15.5  | GTPase HRas                                                  |
| HRASLS3   | 63340667  | 63384355  | 11q12.3  | HRAS-like suppressor 3                                       |
| HRSP12    | 99114572  | 99129469  | 8q22.2   | Ribonuclease UK114                                           |

|          |             |             |          |                                                                        |
|----------|-------------|-------------|----------|------------------------------------------------------------------------|
| HRY      | 193853934   | 193856521   | 3q29     | Transcription factor HES-1                                             |
| HSA9761  | 61683081    | 61699766    | 5q12.1   | Probable dimethyladenosine transferase                                 |
| HSD17B3  | 98997588    | 99064434    | 9q22.32  | Testosterone 17-beta-dehydrogenase 3                                   |
| HSD3B2   | 119957554   | 119965658   | 1p12     | 3 beta-hydroxysteroid dehydrogenase/Delta 5-->4-isomerase type 2       |
| HSP90AB1 | 44214824    | 44221620    | 6p21.1   | Heat shock protein HSP 90-beta                                         |
| HSPA2    | 65002623    | 65009955    | 14q23.3  | Heat shock-related 70 kDa protein 2                                    |
| HSPA6    | 161494036   | 161496681   | 1q23.3   | Heat shock 70 kDa protein 6                                            |
| HSPA8    | 122928197   | 122933938   | 11q24.1  | Heat shock cognate 71 kDa protein                                      |
| HSPB7    | 16340523    | 16346089    | 1p36.13  | Heat shock protein beta-7                                              |
| HSPBAP1  | 122458846   | 122512671   | 3q21.1   | HSPB1-associated protein 1                                             |
| HSPBP1   | 55773599    | 55791749    | 19q13.42 | Hsp70-binding protein 1                                                |
| HSPC023  | 13884982    | 13889276    | 19p13.2  | Leydig cell tumor 10 kDa protein homolog                               |
| HSPC047  | 102,672,879 | 102,678,856 | 7q22.1   | -                                                                      |
| HSPC152  | 64083932    | 64085556    | 11q13.1  | Multifunctional methyltransferase subunit TRM112-like protein          |
| HSPC171  | 67261006    | 67263181    | 16q22.1  | Transmembrane protein 208                                              |
| HSPC268  | 139024203   | 139031065   | 7q34     | UPF0562 protein C7orf55                                                |
| HSPD1    | 198351305   | 198381461   | 2q33.1   | 60 kDa heat shock protein, mitochondrial                               |
| HSPE1    | 198364718   | 198368181   | 2q33.1   | 10 kDa heat shock protein, mitochondrial                               |
| HTR3A    | 113845603   | 113861035   | 11q23.2  | 5-hydroxytryptamine receptor 3A                                        |
| HTRA3    | 8271492     | 8308838     | 4p16.1   | Serine protease HTRA3                                                  |
| HUMMAT1H | 160175127   | 160185166   | 1q23.2   | Astrocytic phosphoprotein PEA-15                                       |
| HYPE     | 11200038    | 11244492    | 19p13.2  | Low-density lipoprotein receptor                                       |
| IBSP     | 88720733    | 88733074    | 4q22.1   | Bone sialoprotein 2                                                    |
| ICAM2    | 62079954    | 62097994    | 17q23.3  | Intercellular adhesion molecule 2                                      |
| ICAM4    | 10397643    | 10399198    | 19p13.2  | Intercellular adhesion molecule 4                                      |
| ICMT     | 6281253     | 6296032     | 1p36.31  | Protein-S-isoprenylcysteine O-methyltransferase                        |
| ID1      | 30193086    | 30194318    | 20q11.21 | DNA-binding protein inhibitor ID-1                                     |
| ID2      | 8818975     | 8824583     | 2p25.1   | DNA-binding protein inhibitor ID-2                                     |
| ID3      | 23884409    | 23886285    | 1p36.12  | DNA-binding protein inhibitor ID-3                                     |
| IDH3A    | 78423840    | 78464291    | 15q25.1  | Isocitrate dehydrogenase [NAD] subunit alpha, mitochondrial            |
| IDH3B    | 2639041     | 2644865     | 20p13    | Isocitrate dehydrogenase [NAD] subunit beta, mitochondrial             |
| IER2     | 13261229    | 13265722    | 19p13.2  | Immediate early response gene 2 protein                                |
| IFI27    | 94571182    | 94583033    | 14q32.12 | Interferon alpha-inducible protein 27, mitochondrial                   |
| IFI30    | 18283972    | 18288927    | 19p13.11 | Gamma-interferon-inducible lysosomal thiol reductase                   |
| IFI35    | 41158742    | 41166473    | 17q21.31 | Interferon-induced 35 kDa protein                                      |
| IFITM1   | 313506      | 315272      | 11p15.5  | Interferon-induced transmembrane protein 1                             |
| IFITM2   | 307631      | 315272      | 11p15.5  | Interferon-induced transmembrane protein 2                             |
| IFNA17   | 21227242    | 21228221    | 9p21.3   | Interferon alpha-17                                                    |
| IFNA2    | 21384254    | 21385396    | 9p21.3   | Interferon alpha-2                                                     |
| IFNA21   | 21165636    | 21166659    | 9p21.3   | Interferon alpha-21                                                    |
| IFNAR2   | 34602206    | 34637980    | 21q22.11 | Interferon alpha/beta receptor 2                                       |
| IFT57    | 107879659   | 107941417   | 3q13.12  | Intraflagellar transport protein 57 homolog                            |
| IGBP1    | 69353299    | 69386174    | Xq13.1   | Immunoglobulin-binding protein 1                                       |
| IGF1     | 102789645   | 102874423   | 12q23.2  | Insulin-like growth factor I                                           |
| IGF2     | 2150342     | 2170833     | 11p15.5  | Insulin-like growth factor II                                          |
| IGFALS   | 1840414     | 1844972     | 16p13.3  | Insulin-like growth factor-binding protein complex acid labile subunit |
| IGFBP1   | 45927956    | 45933267    | 7p12.3   | Insulin-like growth factor-binding protein 1                           |
| IGFBP3   | 45951949    | 45961473    | 7p12.3   | Insulin-like growth factor-binding protein 3                           |
| IGFBP4   | 38599702    | 38613983    | 17q21.2  | Insulin-like growth factor-binding protein 4                           |

|         |             |             |          |                                                                   |
|---------|-------------|-------------|----------|-------------------------------------------------------------------|
| IGFBP5  | 217536828   | 217560248   | 2q35     | Insulin-like growth factor-binding protein 5                      |
| IGFBP6  | 53491220    | 53496129    | 12q13.13 | Insulin-like growth factor-binding protein 6                      |
| IGFBP7  | 57896939    | 57976551    | 4q12     | Insulin-like growth factor-binding protein 7                      |
| IGL@    | 22,026,076  | 22,922,913  | 22q11.2  | Immunoglobulin Lambda Locus                                       |
| IGLL1   | 23915312    | 23922495    | 22q11.23 | Immunoglobulin lambda-like polypeptide 1                          |
| IGSF9   | 159896829   | 159915386   | 1q23.2   | Protein turtle homolog A                                          |
| IHPK2   | 48725436    | 48777786    | 3p21.31  | Inositol hexakisphosphate kinase 2                                |
| IKBKG   | 153769414   | 153796782   | Xq28     | NF-kappa-B essential modulator                                    |
| IL10    | 206940947   | 206945839   | 1q32.1   | Interleukin-10                                                    |
| IL10RB  | 34638663    | 34669539    | 21q22.11 | Interleukin-10 receptor subunit beta                              |
| IL11    | 55875757    | 55881831    | 19q13.42 | Interleukin-11                                                    |
| IL11RA  | 34650699    | 34661889    | 9p13.3   | Interleukin-11 receptor subunit alpha                             |
| IL13    | 131991955   | 131996802   | 5q31.1   | Interleukin-13                                                    |
| IL13RA1 | 117861535   | 117928502   | Xq24     | Interleukin-13 receptor subunit alpha-1                           |
| IL15    | 142557752   | 142655140   | 4q31.21  | Interleukin-15                                                    |
| IL17RA  | 17565844    | 17596583    | 22q11.1  | Interleukin-17 receptor A                                         |
| IL18    | 112013974   | 112034840   | 11q23.1  | Interleukin-18                                                    |
| IL1A    | 113531492   | 113542167   | 2q13     | Interleukin-1 alpha                                               |
| IL1B    | 113587328   | 113594480   | 2q13     | Interleukin-1 beta                                                |
| IL1RN   | 113864791   | 113891593   | 2q13     | Interleukin-1 receptor antagonist protein                         |
| IL21R   | 27413483    | 27462115    | 16p12.1  | Interleukin-21 receptor                                           |
| IL3RA   | 1455509     | 1501578     | Xp22.33  | Interleukin-3 receptor subunit alpha                              |
| IL4     | 132009678   | 132018368   | 5q31.1   | Interleukin-4                                                     |
| IL6     | 22765503    | 22771621    | 7p15.3   | Interleukin-6                                                     |
| IL6R    | 154377669   | 154441926   | 1q21.3   | Interleukin-6 receptor subunit alpha                              |
| IL7     | 79587978    | 79717758    | 8q21.12  | Interleukin-7                                                     |
| IL8     | 219027568   | 219031718   | 2q35     | C-X-C chemokine receptor type 1                                   |
| IL8RA   | 218,162,845 | 218,166,995 | 2q35     | Chemokine (C-X-C Motif) Receptor 1                                |
| IL8RB   | 218990012   | 219001976   | 2q35     | C-X-C chemokine receptor type 2                                   |
| IL9     | 135227935   | 135231516   | 5q31.1   | Interleukin-9                                                     |
| ILF2    | 153634512   | 153643524   | 1q21.3   | Interleukin enhancer-binding factor 2                             |
| ILK     | 6624961     | 6632102     | 11p15.4  | Integrin-linked protein kinase                                    |
| ILKAP   | 239079042   | 239112370   | 2q37.3   | Integrin-linked kinase-associated serine/threonine phosphatase 2C |
| IMP4    | 131099798   | 131105383   | 2q21.1   | U3 small nucleolar ribonucleoprotein protein IMP4                 |
| IMPDH2  | 49061758    | 49066841    | 3p21.31  | Inosine-5'-monophosphate dehydrogenase 2                          |
| INA     | 105036920   | 105050108   | 10q24.33 | Alpha-internexin                                                  |
| INHBA   | 41724712    | 41742706    | 7p14.1   | Inhibin beta A chain                                              |
| INS     | 2181009     | 2182571     | 11p15.5  | Insulin                                                           |
| INSL5   | 67263424    | 67266939    | 1p31.3   | Insulin-like peptide INSL5                                        |
| IRF1    | 131817301   | 131826490   | 5q31.1   | Interferon regulatory factor 1                                    |
| IRF3    | 50162826    | 50169132    | 19q13.33 | Interferon regulatory factor 3                                    |
| IRF4    | 391739      | 411447      | 6p25.3   | Interferon regulatory factor 4                                    |
| IRF5    | 128577666   | 128590089   | 7q32.1   | Interferon regulatory factor 5                                    |
| ISL1    | 50678921    | 50690564    | 5q11.1   | Insulin gene enhancer protein ISL-1                               |
| ISYNA1  | 18545198    | 18549111    | 19p13.11 | Inositol-3-phosphate synthase 1                                   |
| ITFG1   | 47188298    | 47498060    | 16q12.1  | T-cell immunomodulatory protein                                   |
| ITFG2   | 2921788     | 2968957     | 12p13.33 | Integrin-alpha FG-GAP repeat-containing protein 2                 |
| ITGAX   | 31366455    | 31394318    | 16p11.2  | Integrin alpha-X                                                  |
| ITGB1   | 33189247    | 33294720    | 10p11.22 | Integrin beta-1                                                   |
| ITGB2   | 46305868    | 46351904    | 21q22.3  | Integrin beta-2                                                   |
| ITGB4BP | 33866714    | 33872788    | 20q11.22 | Eukaryotic translation initiation factor 6                        |
| ITGB5   | 124480795   | 124620265   | 3q21.2   | Integrin beta-5                                                   |
| ITPK1   | 93403259    | 93582665    | 14q32.12 | Inositol-tetrakisphosphate 1-kinase                               |
| IVD     | 40697686    | 40728146    | 15q15.1  | Isovaleryl-CoA dehydrogenase, mitochondrial                       |

|         |           |           |          |                                                                                |
|---------|-----------|-----------|----------|--------------------------------------------------------------------------------|
| JAGN1   | 9932238   | 9936033   | 3p25.3   | Protein jagunal homolog 1                                                      |
| JPH3    | 87635441  | 87731762  | 16q24.2  | Junctophilin-3                                                                 |
| JUB     | 23440383  | 23451851  | 14q11.2  | LIM domain-containing protein ajuba                                            |
| JUN     | 59246465  | 59249785  | 1p32.1   | Transcription factor AP-1                                                      |
| JUNB    | 12902310  | 12904124  | 19p13.2  | Transcription factor jun-B                                                     |
| JUP     | 39775692  | 39943183  | 17q21.2  | Junction plakoglobin                                                           |
| KARS    | 75661622  | 75682541  | 16q23.1  | Lysine--tRNA ligase                                                            |
| KATNAL1 | 30776767  | 30881621  | 13q12.3  | Katanin p60 ATPase-containing subunit A-like 1                                 |
| KAZALD1 | 102821598 | 102827888 | 10q24.31 | Kazal-type serine protease inhibitor domain-containing protein 1               |
| KBTBD10 | 170366212 | 170382772 | 2q31.1   | Kelch-like protein 41                                                          |
| KCNAB2  | 6051526   | 6161253   | 1p36.31  | Voltage-gated potassium channel subunit beta-2                                 |
| KCNE1   | 35818988  | 35884573  | 21q22.12 | Potassium voltage-gated channel subfamily E member 1                           |
| KCNE2   | 35736323  | 35743688  | 21q22.11 | Potassium voltage-gated channel subfamily E member 2                           |
| KCNG4   | 84255823  | 84273356  | 16q24.1  | Potassium voltage-gated channel subfamily G member 4                           |
| KCNJ15  | 39529128  | 39679279  | 21q22.13 | ATP-sensitive inward rectifier potassium channel 15                            |
| KCNJ8   | 21917889  | 21928515  | 12p12.1  | ATP-sensitive inward rectifier potassium channel 8                             |
| KCNK6   | 38810484  | 38819660  | 19q13.2  | Potassium channel subfamily K member 6                                         |
| KCNN4   | 44270685  | 44285409  | 19q13.31 | Intermediate conductance calcium-activated potassium channel protein 4         |
| KCNRG   | 50589390  | 50595058  | 13q14.2  | Potassium channel regulatory protein                                           |
| KCNS3   | 18059114  | 18542882  | 2p24.2   | Potassium voltage-gated channel subfamily S member 3                           |
| KCTD13  | 29916333  | 29938356  | 16p11.2  | BTB/POZ domain-containing adapter for CUL3-mediated RhoA degradation protein 1 |
| KCTD14  | 77726761  | 77757237  | 11q14.1  | BTB/POZ domain-containing protein KCTD14                                       |
| KDELC1  | 103436631 | 103451357 | 13q33.1  | KDEL motif-containing protein 1                                                |
| KDELR1  | 48885827  | 48894810  | 19q13.33 | ER lumen protein-retaining receptor 1                                          |
| KDELR3  | 38864067  | 38879452  | 22q13.1  | ER lumen protein-retaining receptor 3                                          |
| KEL     | 142638201 | 142659768 | 7q34     | Kell blood group glycoprotein                                                  |
| KIF22   | 29802040  | 29816706  | 16p11.2  | Kinesin-like protein KIF22                                                     |
| KIF9    | 47269516  | 47324941  | 3p21.31  | Kinesin-like protein KIF9                                                      |
| KISS1   | 204159469 | 204165614 | 1q32.1   | Metastasis-suppressor KiSS-1                                                   |
| KLC2    | 66024765  | 66035331  | 11q13.2  | Kinesin light chain 2                                                          |
| KLF12   | 74260226  | 74708394  | 13q22.1  | Krueppel-like factor 12                                                        |
| KLF4    | 110247133 | 110252763 | 9q31.2   | Krueppel-like factor 4                                                         |
| KLHL6   | 183205319 | 183273477 | 3q27.1   | Kelch-like protein 6                                                           |
| KLK1    | 51322404  | 51327043  | 19q13.33 | Kallikrein-1                                                                   |
| KLK3    | 51358171  | 51364020  | 19q13.33 | Prostate-specific antigen                                                      |
| KLRC1   | 10594863  | 10607284  | 12p13.2  | NKG2-A/NKG2-B type II integral membrane protein                                |
| KLRC4   | 10559983  | 10562356  | 12p13.2  | NKG2-F type II integral membrane protein                                       |
| KLRG1   | 9102640   | 9163356   | 12p13.31 | Killer cell lectin-like receptor subfamily G member 1                          |
| KNS2    | 104028233 | 104167888 | 14q32.33 | Kinesin light chain 1                                                          |
| KPNA1   | 122140796 | 122233792 | 3q21.1   | Importin subunit alpha-5                                                       |
| KPNA3   | 50273447  | 50367057  | 13q14.2  | Importin subunit alpha-4                                                       |
| KPNA6   | 32573639  | 32642169  | 1p35.1   | Importin subunit alpha-7                                                       |
| KREMEN2 | 3013945   | 3018384   | 16p13.3  | Kremen protein 2                                                               |
| KRT15   | 39669995  | 39678781  | 17q21.2  | Keratin, type I cytoskeletal 15                                                |
| KRT17   | 39775689  | 39781094  | 17q21.2  | Keratin, type I cytoskeletal 17                                                |
| KRT19   | 39679869  | 39684560  | 17q21.2  | Keratin, type I cytoskeletal 19                                                |
| KRT33B  | 39519746  | 39526052  | 17q21.2  | Keratin, type I cuticular Ha3-II                                               |

|           |            |            |          |                                                                          |
|-----------|------------|------------|----------|--------------------------------------------------------------------------|
| KRT5      | 52908359   | 52914471   | 12q13.13 | Keratin, type II cytoskeletal 5                                          |
| KRT7      | 52626304   | 52645970   | 12q13.13 | Keratin, type II cytoskeletal 7                                          |
| KRT8      | 53290977   | 53343738   | 12q13.13 | Keratin, type II cytoskeletal 8                                          |
| KRTAP4-12 | 39279343   | 39280419   | 17q21.2  | Keratin-associated protein 4-12                                          |
| L3MBTL2   | 41601209   | 41627275   | 22q13.2  | Lethal(3)malignant brain tumor-like protein 2                            |
| LAD1      | 201342372  | 201368736  | 1q32.1   | Ladinin-1                                                                |
| LAIR1     | 54865362   | 54882165   | 19q13.42 | Leukocyte-associated immunoglobulin-like receptor 1                      |
| LALBA     | 48961467   | 48963849   | 12q13.11 | Alpha-lactalbumin                                                        |
| LAMP1     | 113951556  | 113977987  | 13q34    | Lysosome-associated membrane glycoprotein 1                              |
| LAMP2     | 119561682  | 119603220  | Xq24     | Lysosome-associated membrane glycoprotein 2                              |
| LANCL1    | 211295973  | 211342376  | 2q34     | LanC-like protein 1                                                      |
| LASP1     | 37026112   | 37078023   | 17q12    | LIM and SH3 domain protein 1                                             |
| LASS4     | 8271620    | 8327305    | 19p13.2  | Ceramide synthase 4                                                      |
| LBP       | 36974759   | 37005665   | 20q11.23 | Lipopolysaccharide-binding protein                                       |
| LCN2      | 130911350  | 130915734  | 9q34.11  | Neutrophil gelatinase-associated lipocalin                               |
| LDB2      | 16503164   | 16900432   | 4p15.32  | LIM domain-binding protein 2                                             |
| LDHA      | 18415935   | 18429972   | 11p15.1  | L-lactate dehydrogenase A chain                                          |
| LDHB      | 21788276   | 21910791   | 12p12.1  | L-lactate dehydrogenase B chain                                          |
| LECT1     | 53277399   | 53313947   | 13q14.3  | Leukocyte cell-derived chemotaxin 1                                      |
| LEPROTL1  | 29952914   | 30034724   | 8p12     | Leptin receptor overlapping transcript-like 1                            |
| LGALS1    | 38071615   | 38075813   | 22q13.1  | Galectin-1                                                               |
| LGALS3    | 55590828   | 55612126   | 14q22.3  | Galectin-3                                                               |
| LGALS8    | 236681300  | 236716281  | 1q43     | Galectin-8                                                               |
| LGR4      | 27387508   | 27494322   | 11p14.1  | Leucine-rich repeat-containing G-protein coupled receptor 4              |
| LGTN      | 206744620  | 206785904  | 1q32.1   | Eukaryotic translation initiation factor 2D                              |
| LHFP      | 39917029   | 40177665   | 13q13.3  | Lipoma HMGIC fusion partner                                              |
| LHFPL5    | 35773070   | 35801651   | 6p21.31  | Tetraspan membrane protein of hair cell stereocilia                      |
| LHX4      | 180199421  | 180249380  | 1q25.2   | LIM/homeobox protein Lhx4                                                |
| LIG4      | 108859787  | 108870716  | 13q33.3  | DNA ligase 4                                                             |
| LIN28     | 26,410,778 | 26,429,728 | 1p36.11  | Lin-28 Homolog A                                                         |
| LMAN1     | 56995055   | 57027194   | 18q21.32 | Protein ERGIC-53                                                         |
| LMBR1L    | 49490919   | 49504683   | 12q13.12 | Protein LMBR1L                                                           |
| LMCD1     | 8543393    | 8609805    | 3p26.1   | LIM and cysteine-rich domains protein 1                                  |
| LMO4      | 87794151   | 87814606   | 1p22.3   | LIM domain transcription factor LMO4                                     |
| LMO6      | 49031151   | 49042845   | Xp11.23  | Prickle-like protein 3                                                   |
| LOC200420 | 73872046   | 73912703   | 2p13.1   | Putative ALMS1-like protein                                              |
| LOH12CR1  | 12510013   | 12619840   | 12p13.2  | Loss of heterozygosity 12 chromosomal region 1 protein                   |
| LOXL2     | 23154702   | 23282841   | 8p21.3   | Lysyl oxidase homolog 2                                                  |
| LPIN1     | 11817721   | 11967535   | 2p25.1   | Phosphatidate phosphatase LPIN1                                          |
| LPXN      | 58294344   | 58345693   | 11q12.1  | Leupaxin                                                                 |
| LRCH3     | 197518097  | 197615307  | 3q29     | Leucine-rich repeat and calponin homology domain-containing protein 3    |
| LRFN3     | 36426260   | 36436669   | 19q13.12 | Leucine-rich repeat and fibronectin type-III domain-containing protein 3 |
| LRP12     | 105501459  | 105601252  | 8q22.3   | Low-density lipoprotein receptor-related protein 12                      |
| LRRC29    | 67241042   | 67260951   | 16q22.1  | Leucine-rich repeat-containing protein 29                                |
| LSM2      | 31765173   | 31774761   | 6p21.33  | U6 snRNA-associated Sm-like protein LSm2                                 |
| LSM7      | 2321516    | 2328619    | 19p13.3  | U6 snRNA-associated Sm-like protein LSm7                                 |
| LSS       | 47608055   | 47648738   | 21q22.3  | Lanosterol synthase                                                      |
| LTA       | 31539831   | 31542101   | 6p21.33  | Lymphotoxin-alpha                                                        |
| LUM       | 91496406   | 91505608   | 12q21.33 | Lumican                                                                  |
| LY6H      | 144239331  | 144242128  | 8q24.3   | Lymphocyte antigen 6H                                                    |

|          |           |           |          |                                                                     |
|----------|-----------|-----------|----------|---------------------------------------------------------------------|
| LYPLA1   | 54958938  | 55014577  | 8q11.23  | Acyl-protein thioesterase 1                                         |
| LYPLA2   | 24117460  | 24122029  | 1p36.11  | Acyl-protein thioesterase 2                                         |
| LYSMD2   | 52015208  | 52043782  | 15q21.2  | LysM and putative peptidoglycan-binding domain-containing protein 2 |
| LYZ      | 69742121  | 69748014  | 12q15    | Lysozyme C                                                          |
| LZTR1    | 21333751  | 21353327  | 22q11.21 | Leucine-zipper-like transcriptional regulator 1                     |
| M6PRBP1  | 4838353   | 4867780   | 19p13.3  | Perilipin-3                                                         |
| MAD      | 35870717  | 35873955  | 14q13.2  | NF-kappa-B inhibitor alpha                                          |
| MAFK     | 1570350   | 1582679   | 7p22.3   | Transcription factor MafK                                           |
| Mage3    | 151934652 | 151938240 | Xq28     | Melanoma-associated antigen 3                                       |
| Mage6    | 151867214 | 151870825 | Xq28     | Melanoma-associated antigen 6                                       |
| MAGEA1   | 152481522 | 152486115 | Xq28     | Melanoma-associated antigen 1                                       |
| MAGEA10  | 151301782 | 151307033 | Xq28     | Melanoma-associated antigen 10                                      |
| MAGEA3   | 151934652 | 151938240 | Xq28     | Melanoma-associated antigen 3                                       |
| MAGEA6   | 151867214 | 151870825 | Xq28     | Melanoma-associated antigen 6                                       |
| MAGEA9   | 148863584 | 148869397 | Xq28     | Melanoma-associated antigen 9                                       |
| MAGEB4   | 30260057  | 30262293  | Xp21.2   | Melanoma-associated antigen B4                                      |
| MAGEB4   | 30260057  | 30262293  | Xp21.2   | Melanoma-associated antigen B4                                      |
| MAGED2   | 54834032  | 54842445  | Xp11.21  | Melanoma-associated antigen D2                                      |
| MAGEH1   | 55478538  | 55479998  | Xp11.21  | Melanoma-associated antigen H1                                      |
| MALT1    | 56338618  | 56417371  | 18q21.32 | Mucosa-associated lymphoid tissue lymphoma translocation protein 1  |
| MAP1LC3B | 87417601  | 87438385  | 16q24.2  | Microtubule-associated proteins 1A/1B light chain 3B                |
| MAP2K3   | 21187984  | 21218552  | 17p11.2  | Dual specificity mitogen-activated protein kinase kinase 3          |
| MAP2K6   | 67410839  | 67539472  | 17q24.3  | Dual specificity mitogen-activated protein kinase kinase 6          |
| MAP2K7   | 7968728   | 7979363   | 19p13.2  | Dual specificity mitogen-activated protein kinase kinase 7          |
| MAP3K8   | 30722866  | 30750762  | 10p11.23 | Mitogen-activated protein kinase kinase kinase 8                    |
| MAPBPIP  | 156024543 | 156028301 | 1q22     | Ragulator complex protein LAMTOR2                                   |
| MAPK10   | 86936276  | 87515284  | 4q21.3   | Mitogen-activated protein kinase 10                                 |
| MAPK12   | 50683879  | 50700254  | 22q13.33 | Mitogen-activated protein kinase 12                                 |
| MAPK13   | 36095586  | 36107842  | 6p21.31  | Mitogen-activated protein kinase 13                                 |
| MAPK15   | 144798429 | 144804628 | 8q24.3   | Mitogen-activated protein kinase 15                                 |
| MAPK3    | 30125426  | 30134827  | 16p11.2  | Mitogen-activated protein kinase 3                                  |
| MAPK6    | 52244303  | 52358462  | 15q21.2  | Mitogen-activated protein kinase 6                                  |
| MAPK8    | 49514698  | 49647403  | 10q11.22 | Mitogen-activated protein kinase 8                                  |
| MAPRE3   | 27193480  | 27250064  | 2p23.3   | Microtubule-associated protein RP/EB family member 3                |
| MAPRE3   | 27193480  | 27250064  | 2p23.3   | Microtubule-associated protein RP/EB family member 3                |
| MARCKSL1 | 32799433  | 32801980  | 1p35.1   | MARCKS-related protein                                              |
| MATR3    | 138609441 | 138667360 | 5q31.2   | Matrin-3                                                            |
| MAX      | 65472892  | 65569413  | 14q23.3  | Protein max                                                         |
| MB       | 36002811  | 36033998  | 22q12.3  | Myoglobin                                                           |
| MBP      | 74690783  | 74845639  | 18q23    | Myelin basic protein                                                |
| MC1R     | 89978527  | 89987385  | 16q24.3  | Melanocyte-stimulating hormone receptor                             |
| MCEE     | 71336814  | 71357369  | 2p13.3   | Methylmalonyl-CoA epimerase, mitochondrial                          |
| MCF2L    | 113548692 | 113754053 | 13q34    | Guanine nucleotide exchange factor DBS                              |
| MCFD2    | 47129009  | 47168994  | 2p21     | Multiple coagulation factor deficiency protein 2                    |
| MCM3     | 52128807  | 52149679  | 6p12.2   | DNA replication licensing factor MCM3                               |
| MCM7     | 99690351  | 99699563  | 7q22.1   | DNA replication licensing factor MCM7                               |
| MCMD1    | 119134605 | 119256327 | 6q22.31  | DNA helicase MCM9                                                   |

|          |             |             |          |                                                                        |
|----------|-------------|-------------|----------|------------------------------------------------------------------------|
| MDH2     | 75677369    | 75696826    | 7q11.23  | Malate dehydrogenase, mitochondrial                                    |
| MDK      | 46402306    | 46405375    | 11p11.2  | Midkine                                                                |
| MDS1     | 169,083,499 | 169,663,775 | 3q26.2   | Myelodysplasia Syndrome-Associated Protein 1                           |
| MED28    | 17616254    | 17635728    | 4p15.32  | Mediator of RNA polymerase II transcription subunit 28                 |
| MED4     | 48627459    | 48669267    | 13q14.2  | Mediator of RNA polymerase II transcription subunit 4                  |
| MED8     | 43849588    | 43855479    | 1p34.2   | Mediator of RNA polymerase II transcription subunit 8                  |
| MEST     | 130126012   | 130146133   | 7q32.2   | Mesoderm-specific transcript homolog protein                           |
| METTL6   | 15422782    | 15482073    | 3p25.1   | Methyltransferase-like protein 6                                       |
| MFAP1    | 44096690    | 44117000    | 15q15.3  | Microfibrillar-associated protein 1                                    |
| MFAP3    | 153418466   | 153600038   | 5q33.2   | Microfibril-associated glycoprotein 3                                  |
| MGAT1    | 180217541   | 180242652   | 5q35.3   | Alpha-1,3-mannosyl-glycoprotein 2-beta-N-acetylglucosaminyltransferase |
| MGAT2    | 50087489    | 50090198    | 14q21.3  | Alpha-1,6-mannosyl-glycoprotein 2-beta-N-acetylglucosaminyltransferase |
| MGC16169 | 106962756   | 107242652   | 4q24     | TBC domain-containing protein kinase-like protein                      |
| MGC18216 | 98,648,971  | 98,964,530  | 15q26.3  | Insulin-Like Growth Factor 1 Receptor                                  |
| MGC26597 | 7,986,102   | 7,990,344   | 6p24.3   | Phosphatidylinositol-4-Phosphate 5-Kinase, Type I, Pseudogene 1        |
| MGC39372 | 2,854,657   | 2,881,407   | 6p25.2   | erpin Peptidase Inhibitor, Clade B (Ovalbumin), Member 9, Pseudogene 1 |
| MGC39518 | 201838441   | 201936394   | 2q33.1   | Protein FAM126B                                                        |
| MGC40574 | 43,227,211  | 43,228,855  | 2p21     | Long Intergenic Non-Protein Coding RNA 1126                            |
| MGC40579 | 141882414   | 141944449   | 3q23     | Putative glycerol kinase 5                                             |
| MGC5509  | 105953816   | 105965668   | 2q12.1   | Ashwin                                                                 |
| MGC7036  | 123899936   | 123921264   | 12q24.31 | RILP-like protein 2                                                    |
| MGLL     | 127407909   | 127542051   | 3q21.3   | Monoglyceride lipase                                                   |
| MGP      | 15034115    | 15038860    | 12p12.3  | Matrix Gla protein                                                     |
| MGST2    | 140586922   | 140661899   | 4q31.1   | Microsomal glutathione S-transferase 2                                 |
| MIA      | 41277553    | 41283395    | 19q13.2  | Melanoma-derived growth regulatory protein                             |
| MIF      | 24236191    | 24237414    | 22q11.23 | Macrophage migration inhibitory factor                                 |
| MINK1    | 4736683     | 4801356     | 17p13.2  | Misshapen-like kinase 1                                                |
| MIPEP    | 24304328    | 24463558    | 13q12.12 | Mitochondrial intermediate peptidase                                   |
| MIZF     | 118992297   | 119006752   | 11q23.3  | Histone H4 transcription factor                                        |
| MKNK1    | 47023090    | 47082515    | 1p33     | MAP kinase-interacting serine/threonine-protein kinase 1               |
| MKRN2    | 12598513    | 12625212    | 3p25.2   | Probable E3 ubiquitin-protein ligase makorin-2                         |
| MLANA    | 5890802     | 5910606     | 9p24.1   | Melanoma antigen recognized by T-cells 1                               |
| MLF2     | 6857170     | 6876641     | 12p13.31 | Myeloid leukemia factor 2                                              |
| MLH1     | 37034823    | 37107380    | 3p22.2   | DNA mismatch repair protein Mlh1                                       |
| ML-IAP   | 61867235    | 61871859    | 20q13.33 | Baculoviral IAP repeat-containing protein 7                            |
| MLLT11   | 151030234   | 151040970   | 1q21.3   | Protein AF1q                                                           |
| MMP1     | 102660651   | 102668891   | 11q22.2  | Interstitial collagenase                                               |
| MMP10    | 102641234   | 102651359   | 11q22.2  | Stromelysin-2                                                          |
| MMP2     | 55423612    | 55540603    | 16q12.2  | 72 kDa type IV collagenase                                             |
| MMP9     | 44637547    | 44645200    | 20q13.12 | Matrix metalloproteinase-9                                             |
| MOBK12B  | 27325207    | 27529779    | 9p21.2   | MOB kinase activator 3B                                                |
| MOCOS    | 33767482    | 33852120    | 18q12.2  | Molybdenum cofactor sulfurase                                          |
| MORF4L1  | 79102829    | 79190475    | 15q25.1  | Mortality factor 4-like protein 1                                      |
| MOSPD1   | 134021656   | 134049297   | Xq26.3   | Motile sperm domain-containing protein 1                               |
| MPB1     | 8921061     | 8939308     | 1p36.23  | Alpha-enolase                                                          |
| MPG      | 127006      | 135852      | 16p13.3  | DNA-3-methyladenine glycosylase                                        |
| MPP1     | 154006959   | 154049282   | Xq28     | 55 kDa erythrocyte membrane protein                                    |

|        |           |           |          |                                                                     |
|--------|-----------|-----------|----------|---------------------------------------------------------------------|
| MPP6   | 24612887  | 24733812  | 7p15.3   | MAGUK p55 subfamily member 6                                        |
| MPST   | 37415676  | 37425863  | 22q12.3  | 3-mercaptopyruvate sulfurtransferase                                |
| MPV17  | 27532360  | 27548547  | 2p23.3   | Protein Mpv17                                                       |
| MPZ    | 161274525 | 161279762 | 1q23.3   | Myelin protein P0                                                   |
| MRAS   | 138066539 | 138124375 | 3q22.3   | Ras-related protein M-Ras                                           |
| MRCL3  | 3247479   | 3256234   | 18p11.31 | Myosin regulatory light chain 12A                                   |
| MRFAP1 | 6641818   | 6644472   | 4p16.1   | MORF4 family-associated protein 1                                   |
| MRP63  | 21750784  | 21753223  | 13q12.11 | Ribosomal protein 63, mitochondrial                                 |
| MRPL10 | 45900638  | 45908900  | 17q21.32 | 39S ribosomal protein L10, mitochondrial                            |
| MRPL17 | 6702013   | 6704632   | 11p15.4  | 39S ribosomal protein L17, mitochondrial                            |
| MRPL19 | 75873909  | 75917977  | 2p12     | 39S ribosomal protein L19, mitochondrial                            |
| MRPL40 | 19419425  | 19423598  | 22q11.21 | 39S ribosomal protein L40, mitochondrial                            |
| MRPS11 | 89010684  | 89022222  | 15q25.3  | 28S ribosomal protein S11, mitochondrial                            |
| MRPS5  | 95752952  | 95815179  | 2q11.1   | 28S ribosomal protein S5, mitochondrial                             |
| MS4A1  | 60223225  | 60238233  | 11q12.2  | B-lymphocyte antigen CD20                                           |
| MS4A4A | 60048014  | 60076445  | 11q12.2  | Membrane-spanning 4-domains subfamily A member 4A                   |
| MS4A6A | 59939081  | 59952139  | 11q12.2  | Membrane-spanning 4-domains subfamily A member 6A                   |
| MS4A7  | 60145955  | 60163424  | 11q12.2  | Membrane-spanning 4-domains subfamily A member 7                    |
| MSH2   | 47630108  | 47789450  | 2p21     | DNA mismatch repair protein Msh2                                    |
| MSH4   | 76262567  | 76378923  | 1p31.1   | MutS protein homolog 4                                              |
| MSI2   | 55333212  | 55762046  | 17q22    | RNA-binding protein Musashi homolog 2                               |
| MSMB   | 51549498  | 51562517  | 10q11.23 | Beta-microseminoprotein                                             |
| MSN    | 64808257  | 64961791  | Xq12     | Moesin                                                              |
| MSX2   | 174151536 | 174157896 | 5q35.2   | Homeobox protein MSX-2                                              |
| MT1A   | 56672578  | 56673999  | 16q12.2  | Metallothionein-1A                                                  |
| MT1M   | 56666145  | 56667898  | 16q12.2  | Metallothionein-1M                                                  |
| MT3    | 56622986  | 56625000  | 16q12.2  | Metallothionein-3                                                   |
| MTAP   | 21802542  | 21931646  | 9p21.3   | S-methyl-5'-thioadenosine phosphorylase                             |
| MTCH2  | 47638867  | 47664175  | 11p11.2  | Mitochondrial carrier homolog 2                                     |
| MTHFD1 | 64854749  | 64926722  | 14q23.3  | C-1-tetrahydrofolate synthase, cytoplasmic                          |
| MUC1   | 155158300 | 155162707 | 1q22     | Mucin-1                                                             |
| MVK    | 110011060 | 110035067 | 12q24.11 | Mevalonate kinase                                                   |
| MVP    | 29831715  | 29859355  | 16p11.2  | Major vault protein                                                 |
| MX1    | 42792231  | 42831141  | 21q22.3  | Interferon-induced GTP-binding protein Mx1                          |
| MXD3   | 176728462 | 176739758 | 5q35.3   | Max dimerization protein 3                                          |
| MYB    | 135502453 | 135540311 | 6q23.3   | Transcriptional activator Myb                                       |
| MYBL2  | 42295754  | 42345136  | 20q13.12 | Myb-related protein B                                               |
| MYC    | 128747680 | 128753674 | 8q24.21  | Myc proto-oncogene protein                                          |
| MYCBP  | 39328636  | 39347289  | 1p34.3   | C-Myc-binding protein                                               |
| MYF6   | 81101277  | 81103253  | 12q21.31 | Myogenic factor 6                                                   |
| MYL2   | 111348623 | 111358526 | 12q24.11 | Myosin regulatory light chain 2, ventricular/cardiac muscle isoform |
| MYNN   | 169490619 | 169507504 | 3q26.2   | Myoneurin                                                           |
| MYOC   | 171604557 | 171621823 | 1q24.3   | Myocilin                                                            |
| MYOZ1  | 75391412  | 75401515  | 10q22.2  | Myozenin-1                                                          |
| NAGK   | 71291474  | 71306935  | 2p13.3   | N-acetyl-D-glucosamine kinase                                       |
| NAPSA  | 50861734  | 50869087  | 19q13.33 | Napsin-A                                                            |
| NASP   | 46049518  | 46084566  | 1p34.1   | Nuclear autoantigenic sperm protein                                 |
| NAT13  | 113435307 | 113465147 | 3q13.2   | N-alpha-acetyltransferase 50                                        |
| NAT5   | 19997760  | 20014299  | 20p11.23 | N-alpha-acetyltransferase 20                                        |
| NBL1   | 19967048  | 19984945  | 1p36.13  | Neuroblastoma suppressor of tumorigenicity 1                        |
| NCDN   | 36023074  | 36032875  | 1p34.3   | Neurochondrin                                                       |

|         |           |           |          |                                                                      |
|---------|-----------|-----------|----------|----------------------------------------------------------------------|
| NCF1    | 74188309  | 74203659  | 7q11.23  | Neutrophil cytosol factor 1                                          |
| NCF2    | 183524698 | 183560011 | 1q25.3   | Neutrophil cytosol factor 2                                          |
| NCOA4   | 51565108  | 51590734  | 10q11.23 | Nuclear receptor coactivator 4                                       |
| NDUFA3  | 54606036  | 54612564  | 19q13.42 | NADH dehydrogenase [ubiquinone] 1 alpha sub-complex subunit 3        |
| NDUFA6  | 42481529  | 42486959  | 22q13.2  | NADH dehydrogenase [ubiquinone] 1 alpha sub-complex subunit 6        |
| NDUFB3  | 201936156 | 201950473 | 2q33.1   | NADH dehydrogenase [ubiquinone] 1 beta subcomplex subunit 3          |
| NDUFB4  | 120315156 | 120321347 | 3q13.33  | NADH dehydrogenase [ubiquinone] 1 beta subcomplex subunit 4          |
| NDUFB7  | 14676890  | 14682874  | 19p13.12 | NADH dehydrogenase [ubiquinone] 1 beta subcomplex subunit 7          |
| NDUFS3  | 47586888  | 47606114  | 11p11.2  | NADH dehydrogenase [ubiquinone] iron-sulfur protein 3, mitochondrial |
| NDUFV1  | 67374323  | 67380006  | 11q13.2  | NADH dehydrogenase [ubiquinone] flavoprotein 1, mitochondrial        |
| NDUFV2  | 9102628   | 9134343   | 18p11.22 | NADH dehydrogenase [ubiquinone] flavoprotein 2, mitochondrial        |
| NDUFV3  | 44299754  | 44333414  | 21q22.3  | NADH dehydrogenase [ubiquinone] flavoprotein 3, mitochondrial        |
| NEDD1   | 97301001  | 97347129  | 12q23.1  | Protein NEDD1                                                        |
| NEFL    | 24808468  | 24814624  | 8p21.2   | Neurofilament light polypeptide                                      |
| NEIL1   | 75639296  | 75647592  | 15q24.2  | Endonuclease 8-like 1                                                |
| NEUROD1 | 182537815 | 182545603 | 2q31.3   | Neurogenic differentiation factor 1                                  |
| NEUROG1 | 134869991 | 134871639 | 5q31.1   | Neurogenin-1                                                         |
| NF2     | 29999545  | 30094587  | 22q12.2  | Merlin                                                               |
| NFE2    | 54685895  | 54694905  | 12q13.13 | Transcription factor NF-E2 45 kDa subunit                            |
| NFIA    | 61330931  | 61928465  | 1p31.3   | Nuclear factor 1 A-type                                              |
| NFIB    | 14081842  | 14398982  | 9p22.3   | Nuclear factor 1 B-type                                              |
| NFIC    | 3359561   | 3469215   | 19p13.3  | Nuclear factor 1 C-type                                              |
| NFKBIA  | 35870717  | 35873955  | 14q13.2  | NF-kappa-B inhibitor alpha                                           |
| NFKBIL2 | 145654165 | 145669827 | 8q24.3   | Tonsoku-like protein                                                 |
| NFX1    | 33290509  | 33371155  | 9p13.3   | Transcriptional repressor NF-X1                                      |
| NFYB    | 104510855 | 104532067 | 12q23.3  | Nuclear transcription factor Y subunit beta                          |
| NGFB    | 115828539 | 115880857 | 1p13.2   | Beta-nerve growth factor                                             |
| NGLY1   | 25760435  | 25831530  | 3p24.2   | Peptide-N(4)-(N-acetyl-beta-glucosaminyl)asparagine amidase          |
| NIF3L1  | 201754050 | 201768655 | 2q33.1   | NIF3-like protein 1                                                  |
| NIFUN   | 108956358 | 108963160 | 12q23.3  | Iron-sulfur cluster assembly enzyme ISCU, mitochondrial              |
| NIP30   | 57186378  | 57220028  | 16q13    | Protein FAM192A                                                      |
| NIP7    | 69373333  | 69377014  | 16q22.1  | 60S ribosome subunit biogenesis protein NIP7 homolog                 |
| NIPA1   | 23043277  | 23100005  | 15q11.2  | Magnesium transporter NIPA1                                          |
| NIT1    | 161087876 | 161095235 | 1q23.3   | Nitrilase homolog 1                                                  |
| NKG7    | 51874860  | 51875969  | 19q13.41 | Protein NKG7                                                         |
| NKIRAS2 | 40163400  | 40177659  | 17q21.2  | NF-kappa-B inhibitor-interacting Ras-like protein 2                  |
| NME6    | 48334754  | 48343175  | 3p21.31  | Nucleoside diphosphate kinase 6                                      |
| NMUR2   | 151771093 | 151812929 | 5q33.1   | Neuromedin-U receptor 2                                              |
| NOL3    | 67204057  | 67209643  | 16q22.1  | Nucleolar protein 3                                                  |
| NOV     | 120428546 | 120436593 | 8q24.12  | Protein NOV homolog                                                  |
| NPC2    | 74942895  | 74960880  | 14q24.3  | Epididymal secretory protein E1                                      |
| NPEPL1  | 57264187  | 57294294  | 20q13.32 | Probable aminopeptidase NPEPL1                                       |
| NPM1    | 170814120 | 170838141 | 5q35.1   | Nucleophosmin                                                        |

|         |           |           |          |                                                                         |
|---------|-----------|-----------|----------|-------------------------------------------------------------------------|
| NPPB    | 11917521  | 11918988  | 1p36.22  | Natriuretic peptides B                                                  |
| NPTX2   | 98246609  | 98259180  | 7q22.1   | Neuronal pentraxin-2                                                    |
| NPY1R   | 164245113 | 164265984 | 4q32.2   | Neuropeptide Y receptor type 1                                          |
| NR1D2   | 23986751  | 24022109  | 3p24.2   | Nuclear receptor subfamily 1 group D member 2                           |
| NR1H3   | 47269851  | 47290396  | 11p11.2  | Oxysterols receptor LXR-alpha                                           |
| NR2E1   | 108487262 | 108510013 | 6q21     | Nuclear receptor subfamily 2 group E member 1                           |
| NRBP1   | 27650657  | 27665126  | 2p23.3   | Nuclear receptor-binding protein                                        |
| NRIP1   | 16333556  | 16437321  | 21q11.2  | Nuclear receptor-interacting protein 1                                  |
| NRSN1   | 24126350  | 24155128  | 6p22.3   | Neurensin-1                                                             |
| NSDHL   | 151999511 | 152038273 | Xq28     | Sterol-4-alpha-carboxylate 3-dehydrogenase, decarboxylating             |
| NSFL1C  | 1422807   | 1454487   | 20p13    | NSFL1 cofactor p47                                                      |
| NSUN5   | 72716514  | 72722864  | 7q11.23  | Probable 28S rRNA (cytosine-C(5))-methyltransferase                     |
| NT5C2   | 104845940 | 104953056 | 10q24.32 | Cytosolic purine 5'-nucleotidase                                        |
| NUCKS1  | 205681947 | 205719404 | 1q32.1   | Nuclear ubiquitous casein and cyclin-dependent kinase substrate 1       |
| NUDT1   | 2281857   | 2290781   | 7p22.3   | 7,8-dihydro-8-oxoguanine triphosphatase                                 |
| NUDT2   | 34329504  | 34343709  | 9p13.3   | Bis(5'-nucleosyl)-tetraphosphatase [asymmetrical]                       |
| NUDT3   | 34247456  | 34360451  | 6p21.31  | Diphosphoinositol polyphosphate phosphohydrolase 1                      |
| NUDT4   | 93771659  | 93797024  | 12q22    | Diphosphoinositol polyphosphate phosphohydrolase 2                      |
| NUDT5   | 12207324  | 12238143  | 10p13    | ADP-sugar pyrophosphatase                                               |
| NUDT6   | 123809852 | 123844123 | 4q28.1   | Nucleoside diphosphate-linked moiety X motif 6                          |
| NUMB    | 73741815  | 73930348  | 14q24.2  | Protein numb homolog                                                    |
| NUP54   | 77035812  | 77069668  | 4q21.1   | Nucleoporin p54                                                         |
| NUP62   | 50410082  | 50433020  | 19q13.33 | Nuclear pore glycoprotein p62                                           |
| NUSAP1  | 41624892  | 41673248  | 15q15.1  | Nucleolar and spindle-associated protein 1                              |
| NXF2    | 101470280 | 101581634 | Xq22.1   | Nuclear RNA export factor 2                                             |
| OAS1    | 113344582 | 113369990 | 12q24.13 | 2'-5'-oligoadenylate synthase 1                                         |
| OBRGRP  | 65886270  | 65901690  | 1p31.3   | Leptin receptor gene-related protein                                    |
| OCLN    | 68788119  | 68853931  | 5q13.2   | Occludin                                                                |
| OGG1    | 9791628   | 9829903   | 3p25.3   | N-glycosylase/DNA lyase                                                 |
| OGN     | 95146249  | 95166978  | 9q22.31  | Mimecan                                                                 |
| OLFML3  | 114522063 | 114524876 | 1p13.2   | Olfactomedin-like protein 3                                             |
| OLIG1   | 34442450  | 34444726  | 21q22.11 | Oligodendrocyte transcription factor 1                                  |
| OLR1    | 10310902  | 10324737  | 12p13.2  | Oxidized low-density lipoprotein receptor 1                             |
| OPRL1   | 62711526  | 62731996  | 20q13.33 | Nociceptin receptor                                                     |
| OPTN    | 13141449  | 13180291  | 10p13    | Optineurin                                                              |
| OR2C3   | 247693434 | 247697141 | 1q44     | Olfactory receptor 2C3                                                  |
| OR51E2  | 4701401   | 4719084   | 11p15.4  | Olfactory receptor 51E2                                                 |
| ORC2L   | 201773696 | 201828403 | 2q33.1   | Origin recognition complex subunit 2                                    |
| ORC5L   | 103766788 | 103848495 | 7q22.1   | Origin recognition complex subunit 5                                    |
| OS9     | 58087738  | 58115340  | 12q13.3  | Protein OS-9                                                            |
| OSBPL2  | 60813580  | 60871268  | 20q13.33 | Oxysterol-binding protein-related protein 2                             |
| OSCAR   | 54597933  | 54606000  | 19q13.42 | Osteoclast-associated immunoglobulin-like receptor                      |
| OSGEP   | 20914570  | 20923264  | 14q11.2  | Probable tRNA N6-adenosine threonylcarbamoyl-transferase                |
| OSGEPL1 | 190611386 | 190627953 | 2q32.2   | Probable tRNA N6-adenosine threonylcarbamoyl-transferase, mitochondrial |
| OSM     | 30658818  | 30662829  | 22q12.2  | Oncostatin-M                                                            |
| OTX1    | 63277192  | 63284971  | 2p15     | Homeobox protein OTX1                                                   |
| OXCT    | 41730167  | 41870621  | 5p13.1   | Succinyl-CoA:3-ketoacid coenzyme A transferase 1, mitochondrial         |

|         |           |           |          |                                                                                   |
|---------|-----------|-----------|----------|-----------------------------------------------------------------------------------|
| OXCT1   | 41730167  | 41870621  | 5p13.1   | Succinyl-CoA:3-ketoacid coenzyme A transferase 1, mitochondrial                   |
| OXSRI   | 38206580  | 38296979  | 3p22.2   | Serine/threonine-protein kinase OSR1                                              |
| p21     | 112084840 | 112259313 | 1p13.2   | Ras-related protein Rap-1A                                                        |
| P2RX7   | 121570622 | 121623876 | 12q24.31 | P2X purinoceptor 7                                                                |
| P2RY12  | 151055168 | 151102600 | 3q25.1   | P2Y purinoceptor 12                                                               |
| P2RY2   | 72929343  | 72947397  | 11q13.4  | P2Y purinoceptor 2                                                                |
| P2RY6   | 72975550  | 73009662  | 11q13.4  | P2Y purinoceptor 6                                                                |
| p53     | 7565097   | 7590856   | 17p13.1  | Cellular tumor antigen p53                                                        |
| PA2G4   | 56498103  | 56507691  | 12q13.2  | Proliferation-associated protein 2G4                                              |
| PABPC1  | 101698044 | 101735037 | 8q22.3   | Polyadenylate-binding protein 1                                                   |
| PACSN1  | 34433916  | 34503006  | 6p21.31  | Protein kinase C and casein kinase substrate in neurons protein 1                 |
| PACSN3  | 47199076  | 47207994  | 11p11.2  | Protein kinase C and casein kinase substrate in neurons protein 3                 |
| PAFAH2  | 26286258  | 26324648  | 1p36.11  | Platelet-activating factor acetylhydrolase 2, cytoplasmic                         |
| PAGE1   | 49452053  | 49460596  | Xp11.23  | P antigen family member 1                                                         |
| PAGE4   | 49593863  | 49598576  | Xp11.23  | P antigen family member 4                                                         |
| PAICS   | 57301907  | 57327534  | 4q12     | Multifunctional protein ADE2                                                      |
| PAK1IP1 | 10694928  | 10710015  | 6p24.2   | p21-activated protein kinase-interacting protein 1                                |
| PAPOLB  | 4897364   | 4901625   | 7p22.1   | Poly(A) polymerase beta                                                           |
| PAQR5   | 69591286  | 69700119  | 15q23    | Membrane progesterin receptor gamma                                               |
| PARD6A  | 67694849  | 67696681  | 16q22.1  | Partitioning defective 6 homolog alpha                                            |
| PARL    | 183547173 | 183602721 | 3q27.1   | Presenilins-associated rhomboid-like protein, mitochondrial                       |
| PARP1   | 226548392 | 226595780 | 1q42.12  | Poly [ADP-ribose] polymerase 1                                                    |
| PAX6    | 31806340  | 31839509  | 11p13    | Paired box protein Pax-6                                                          |
| PAX8    | 113973574 | 114036527 | 2q13     | Paired box protein Pax-8                                                          |
| PCDHGC3 | 140855580 | 140892542 | 5q31.3   | Protocadherin gamma-C3                                                            |
| PCK1    | 56136136  | 56141513  | 20q13.31 | Phosphoenolpyruvate carboxykinase, cytosolic [GTP]                                |
| PCNA    | 5095599   | 5107272   | 20p12.3  | Proliferating cell nuclear antigen                                                |
| PCOLCE  | 100199800 | 100205798 | 7q22.1   | Procollagen C-endopeptidase enhancer 1                                            |
| PCSK2   | 17206752  | 17465223  | 20p12.1  | Neuroendocrine convertase 2                                                       |
| PCSK5   | 78505560  | 78977255  | 9q21.13  | Proprotein convertase subtilisin/kexin type 5                                     |
| PDCD10  | 167401086 | 167452727 | 3q26.1   | Programmed cell death protein 10                                                  |
| PDCD2   | 170884383 | 170893780 | 6q27     | Programmed cell death protein 2                                                   |
| PDCD4   | 112631565 | 112659764 | 10q25.2  | Programmed cell death protein 4                                                   |
| PDCD5   | 33071974  | 33078358  | 19q13.11 | Programmed cell death protein 5                                                   |
| PDCD6   | 271736    | 353971    | 5p15.33  | Programmed cell death protein 6                                                   |
| PDCL    | 125560668 | 125590910 | 9q33.2   | Phosducin-like protein                                                            |
| PDE4A   | 10527449  | 10580305  | 19p13.2  | cAMP-specific 3',5'-cyclic phosphodiesterase 4A                                   |
| PDE6B   | 619373    | 664571    | 4p16.3   | Rod cGMP-specific 3',5'-cyclic phosphodiesterase subunit beta                     |
| PDE6D   | 232597135 | 232650982 | 2q37.1   | Retinal rod rhodopsin-sensitive cGMP 3',5'-cyclic phosphodiesterase subunit delta |
| PDEF    | 34505579  | 34524110  | 6p21.31  | SAM pointed domain-containing Ets transcription factor                            |
| PDGFB   | 39619364  | 39640756  | 22q13.1  | Platelet-derived growth factor subunit B                                          |
| PDHB    | 58413357  | 58419584  | 3p14.3   | Pyruvate dehydrogenase E1 component subunit beta, mitochondrial                   |
| PDIA3   | 44038590  | 44065477  | 15q15.3  | Protein disulfide-isomerase A3                                                    |
| PDIA4   | 148700154 | 148725733 | 7q36.1   | Protein disulfide-isomerase A4                                                    |
| PDIA6   | 10923517  | 10978103  | 2p25.1   | Protein disulfide-isomerase A6                                                    |

|          |           |           |          |                                                                                   |
|----------|-----------|-----------|----------|-----------------------------------------------------------------------------------|
| PDK4     | 95212811  | 95225803  | 7q21.3   | [Pyruvate dehydrogenase (acetyl-transferring)] kinase isozyme 4, mitochondrial    |
| PDPK1    | 2587965   | 2653189   | 16p13.3  | 3-phosphoinositide-dependent protein kinase 1                                     |
| PEA15    | 160175127 | 160185166 | 1q23.2   | Astrocytic phosphoprotein PEA-15                                                  |
| PENK     | 57349233  | 57359293  | 8q12.1   | Proenkephalin-A                                                                   |
| PEX10    | 2336236   | 2345236   | 1p36.32  | Peroxisome biogenesis factor 10                                                   |
| PEX11A   | 90220995  | 90234014  | 15q26.1  | Peroxisomal membrane protein 11A                                                  |
| PEX11B   | 145516252 | 145523730 | 1q21.1   | Peroxisomal membrane protein 11B                                                  |
| PEX14    | 10532345  | 10690815  | 1p36.22  | Peroxisomal membrane protein PEX14                                                |
| PEX19    | 160246602 | 160256138 | 1q23.2   | Peroxisomal biogenesis factor 19                                                  |
| PEX3     | 143771944 | 143811147 | 6q24.2   | Peroxisomal biogenesis factor 3                                                   |
| PEX5     | 7341281   | 7371170   | 12p13.31 | Peroxisomal targeting signal 1 receptor                                           |
| PFKFB4   | 48555117  | 48599448  | 3p21.31  | 6-phosphofructo-2-kinase/fructose-2,6-bisphosphatase 4                            |
| PFKL     | 45719934  | 45747259  | 21q22.3  | ATP-dependent 6-phosphofructokinase, liver type                                   |
| PFKP     | 3108525   | 3179904   | 10p15.2  | ATP-dependent 6-phosphofructokinase, platelet type                                |
| PFN1     | 4848947   | 4852356   | 17p13.2  | Profilin-1                                                                        |
| PGAM1    | 99185917  | 99193198  | 10q24.1  | Phosphoglycerate mutase 1                                                         |
| PGCP     | 97657455  | 98161882  | 8q22.1   | Carboxypeptidase Q                                                                |
| PGDS     | 139871956 | 139879887 | 9q34.3   | Prostaglandin-H2 D-isomerase                                                      |
| PGLS     | 17622438  | 17632097  | 19p13.11 | 6-phosphogluconolactonase                                                         |
| PGRMC1   | 118370216 | 118378429 | Xq24     | Membrane-associated progesterone receptor component 1                             |
| PGS1     | 76374721  | 76421195  | 17q25.3  | CDP-diacylglycerol--glycerol-3-phosphate 3-phosphatidyltransferase, mitochondrial |
| PHB      | 47481414  | 47492246  | 17q21.33 | Prohibitin                                                                        |
| PHF10    | 170104001 | 170124151 | 6q27     | PHD finger protein 10                                                             |
| PHF11    | 50069746  | 50103123  | 13q14.2  | PHD finger protein 11                                                             |
| PHF17    | 129730779 | 129796379 | 4q28.2   | Protein Jade-1                                                                    |
| PHKA2    | 18910418  | 19002716  | Xp22.13  | Phosphorylase b kinase regulatory subunit alpha, liver isoform                    |
| PHYH     | 13319796  | 13344412  | 10p13    | Phytanoyl-CoA dioxygenase, peroxisomal                                            |
| PII4     | 167159577 | 167196792 | 3q26.1   | Serpin I2                                                                         |
| PI3      | 43803517  | 43805185  | 20q13.12 | Elafin                                                                            |
| PIAS4    | 4007644   | 4039384   | 19p13.3  | E3 SUMO-protein ligase PIAS4                                                      |
| PIGF     | 46808076  | 46844258  | 2p21     | Phosphatidylinositol-glycan biosynthesis class F protein                          |
| PIGQ     | 616995    | 634136    | 16p13.3  | Phosphatidylinositol N-acetylglucosaminyltransferase subunit Q                    |
| PIK3R3   | 46505812  | 46642160  | 1p34.1   | Phosphatidylinositol 3-kinase regulatory subunit gamma                            |
| PIP      | 142829170 | 142836839 | 7q34     | Prolactin-inducible protein                                                       |
| PIP5K2C  | 57984957  | 57997198  | 12q13.3  | Phosphatidylinositol 5-phosphate 4-kinase type-2 gamma                            |
| PIPOX    | 27277531  | 27384234  | 17q11.2  | Peroxisomal sarcosine oxidase                                                     |
| PIR      | 15402921  | 15511687  | Xp22.2   | Pirin                                                                             |
| PITX2    | 111538579 | 111563279 | 4q25     | Pituitary homeobox 2                                                              |
| PITX3    | 103989943 | 104001231 | 10q24.32 | Pituitary homeobox 3                                                              |
| PIWIL4   | 94277006  | 94354587  | 11q21    | Piwi-like protein 4                                                               |
| PKD2L1   | 102047903 | 102090243 | 10q24.31 | Polycystic kidney disease 2-like 1 protein                                        |
| PKIA     | 79428374  | 79517502  | 8q21.12  | cAMP-dependent protein kinase inhibitor alpha                                     |
| PKNOX1   | 44394620  | 44453691  | 21q22.3  | Homeobox protein PKNOX1                                                           |
| PLA2G12A | 110631145 | 110651233 | 4q25     | Group XIIA secretory phospholipase A2                                             |
| PLA2G2A  | 20301925  | 20306932  | 1p36.13  | Phospholipase A2, membrane associated                                             |

|         |           |           |          |                                                                   |
|---------|-----------|-----------|----------|-------------------------------------------------------------------|
| PLA2G3  | 31530795  | 31536593  | 22q12.2  | Group 3 secretory phospholipase A2                                |
| PLA2G4D | 42359207  | 42386752  | 15q15.1  | Cytosolic phospholipase A2 delta                                  |
| PLAC1   | 133699868 | 133898352 | Xq26.3   | Placenta-specific protein 1                                       |
| PLAGL1  | 144261437 | 144385735 | 6q24.2   | Zinc finger protein PLAGL1                                        |
| PLAGL2  | 30780306  | 30795594  | 20q11.21 | Zinc finger protein PLAGL2                                        |
| PLAT    | 42032236  | 42065242  | 8p11.21  | Tissue-type plasminogen activator                                 |
| PLAUR   | 44150247  | 44174699  | 19q13.31 | Urokinase plasminogen activator surface receptor                  |
| PLCD4   | 219472488 | 219501907 | 2q35     | 1-phosphatidylinositol 4,5-bisphosphate phosphodiesterase delta-4 |
| PLCG2   | 81772702  | 81991899  | 16q23.3  | 1-phosphatidylinositol 4,5-bisphosphate phosphodiesterase gamma-2 |
| PLEK    | 68592305  | 68624585  | 2p13.3   | Pleckstrin                                                        |
| PLEK2   | 67853700  | 67878917  | 14q23.3  | Pleckstrin-2                                                      |
| PLEKHA1 | 124134212 | 124191867 | 10q26.13 | Pleckstrin homology domain-containing family A member 1           |
| PLEKHA8 | 30067020  | 30170096  | 7p14.3   | Pleckstrin homology domain-containing family A member 8           |
| PLEKHB2 | 131862420 | 132111282 | 2q21.1   | Pleckstrin homology domain-containing family B member 2           |
| PLEKHF2 | 96146032  | 96168912  | 8q22.1   | Pleckstrin homology domain-containing family F member 2           |
| PLEKHO1 | 150121373 | 150136916 | 1q21.2   | Pleckstrin homology domain-containing family O member 1           |
| PLK2    | 57749809  | 57756087  | 5q11.2   | Serine/threonine-protein kinase PLK2                              |
| PLN     | 118869461 | 118881893 | 6q22.31  | Cardiac phospholamban                                             |
| PLS3    | 114795501 | 114885181 | Xq23     | Plastin-3                                                         |
| PLSCR3  | 7293046   | 7307416   | 17p13.1  | Phospholipid scramblase 3                                         |
| PLTP    | 44527399  | 44540794  | 20q13.12 | Phospholipid transfer protein                                     |
| PMP2    | 82352561  | 82359758  | 8q21.13  | Myelin P2 protein                                                 |
| PMP22   | 15133095  | 15168643  | 17p12    | Peripheral myelin protein 22                                      |
| PMVK    | 154897210 | 154909467 | 1q21.3   | Phosphomevalonate kinase                                          |
| PNPLA4  | 7866288   | 7895780   | Xp22.31  | Patatin-like phospholipase domain-containing protein 4            |
| PODN    | 53527854  | 53551174  | 1p32.3   | Podocan                                                           |
| POLA2   | 65029233  | 65073060  | 11q13.1  | DNA polymerase alpha subunit B                                    |
| POLB    | 42195972  | 42229326  | 8p11.21  | DNA polymerase beta                                               |
| POLD1   | 50887461  | 50921273  | 19q13.33 | DNA polymerase delta catalytic subunit                            |
| POLD2   | 44154286  | 44163957  | 7p13     | DNA polymerase delta subunit 2                                    |
| POLR2C  | 57496299  | 57505922  | 16q21    | DNA-directed RNA polymerase II subunit RPB3                       |
| POLR2I  | 36604612  | 36606248  | 19q13.12 | DNA-directed RNA polymerase II subunit RPB9                       |
| POLR2J  | 102113565 | 102119354 | 7q22.1   | DNA-directed RNA polymerase II subunit RPB11-a                    |
| POLR2K  | 101162812 | 101166230 | 8q22.2   | DNA-directed RNA polymerases I, II, and III subunit RPABC4        |
| POLR2L  | 837356    | 842545    | 11p15.5  | DNA-directed RNA polymerases I, II, and III subunit RPABC5        |
| POLR3K  | 96407     | 103628    | 16p13.3  | DNA-directed RNA polymerase III subunit RPC10                     |
| POMC    | 25383722  | 25391772  | 2p23.3   | Pro-opiomelanocortin                                              |
| POP4    | 30094924  | 30108144  | 19q12    | Ribonuclease P protein subunit p29                                |
| PORCN   | 48367350  | 48379202  | Xp11.23  | Protein-serine O-palmitoleoyltransferase porcupine                |
| POT1    | 124462440 | 124570037 | 7q31.33  | Protection of telomeres protein 1                                 |
| PPAP2B  | 56960419  | 57110974  | 1p32.2   | Lipid phosphate phosphohydrolase 3                                |
| PPARG   | 12328867  | 12475855  | 3p25.2   | Peroxisome proliferator-activated receptor gamma                  |
| PPFIBP2 | 7534529   | 7678358   | 11p15.4  | Liprin-beta-2                                                     |
| PPGB    | 44518783  | 44527459  | 20q13.12 | Lysosomal protective protein                                      |
| PPIA    | 44836279  | 44864163  | 7p13     | Peptidyl-prolyl cis-trans isomerase A                             |

|             |            |            |          |                                                                                   |
|-------------|------------|------------|----------|-----------------------------------------------------------------------------------|
| PPIB        | 64448011   | 64455404   | 15q22.31 | Peptidyl-prolyl cis-trans isomerase B                                             |
| PPID        | 159630286  | 159644548  | 4q32.1   | Peptidyl-prolyl cis-trans isomerase D                                             |
| PPIH        | 43124096   | 43142429   | 1p34.2   | Peptidyl-prolyl cis-trans isomerase H                                             |
| PPIL1       | 36822603   | 36842800   | 6p21.2   | Peptidyl-prolyl cis-trans isomerase-like 1                                        |
| PPIL5       | 50065415   | 50081390   | 14q21.3  | Leucine-rich repeat protein 1                                                     |
| PPM1A       | 60712470   | 60765805   | 14q23.1  | Protein phosphatase 1A                                                            |
| PPME1       | 73882144   | 73965748   | 11q13.4  | Protein phosphatase methylesterase 1                                              |
| PPP1CB      | 28974506   | 29025806   | 2p23.2   | Serine/threonine-protein phosphatase PP1-beta catalytic subunit                   |
| PPP2R1A     | 52693292   | 52730687   | 19q13.41 | Serine/threonine-protein phosphatase 2A 65 kDa regulatory subunit A alpha isoform |
| PPP2R2B     | 145967936  | 146464347  | 5q32     | Serine/threonine-protein phosphatase 2A 55 kDa regulatory subunit B beta isoform  |
| PPP4C       | 30087299   | 30096698   | 16p11.2  | Serine/threonine-protein phosphatase 4 catalytic subunit                          |
| PRAME       | 22890123   | 22901768   | 22q11.22 | Melanoma antigen preferentially expressed in tumors                               |
| PRCP        | 82534544   | 82681626   | 11q14.1  | Lysosomal Pro-X carboxypeptidase                                                  |
| PRDM4       | 108126643  | 108155049  | 12q23.3  | PR domain zinc finger protein 4                                                   |
| PRDX1       | 45976708   | 45988719   | 1p34.1   | Peroxiredoxin-1                                                                   |
| PRDX2       | 12907634   | 12912694   | 19p13.2  | Peroxiredoxin-2                                                                   |
| PRDX4       | 23682379   | 23704516   | Xp22.11  | Peroxiredoxin-4                                                                   |
| PRELP       | 203444956  | 203460480  | 1q32.1   | Prolargin                                                                         |
| PRG1        | 43,349,056 | 43,349,548 | 19q13.2  | P53-Responsive Gene 1                                                             |
| PRG2        | 57154267   | 57158130   | 11q12.1  | Bone marrow proteoglycan                                                          |
| PRKAR1A     | 66507921   | 66547460   | 17q24.2  | cAMP-dependent protein kinase type I-alpha regulatory subunit                     |
| PRKCA       | 64298754   | 64806861   | 17q24.2  | Protein kinase C alpha type                                                       |
| PRKCDBP     | 6340176    | 6341877    | 11p15.4  | Protein kinase C delta-binding protein                                            |
| PRKR        | 102004319  | 102067123  | 7q22.1   | PRKR-interacting protein 1                                                        |
| PRKRIP1     | 102004319  | 102067123  | 7q22.1   | PRKR-interacting protein 1                                                        |
| PRL         | 22287480   | 22297730   | 6p22.3   | Prolactin                                                                         |
| PRM1        | 11374693   | 11375207   | 16p13.13 | Sperm protamine P1                                                                |
| PRMT5       | 23389720   | 23398794   | 14q11.2  | Protein arginine N-methyltransferase 5                                            |
| PRNP        | 4666882    | 4682236    | 20p13    | Major prion protein                                                               |
| Progranulin | 42422614   | 42430470   | 17q21.31 | Granulins                                                                         |
| PROK1       | 110993822  | 110999976  | 1p13.3   | Prokineticin-1                                                                    |
| ProSAPiP1   | 3143263    | 3154192    | 20p13    | Leucine zipper putative tumor suppressor 3                                        |
| PRPF19      | 60658202   | 60674060   | 11q12.2  | Pre-mRNA-processing factor 19                                                     |
| PRPS1       | 106871737  | 106894256  | Xq22.3   | Ribose-phosphate pyrophosphokinase 1                                              |
| PRUNE       | 150980896  | 151008189  | 1q21.3   | Protein prune homolog                                                             |
| PRV1        | 43857811   | 43867480   | 19q13.31 | CD177 antigen                                                                     |
| PSAP        | 73576055   | 73611126   | 10q22.1  | Prosaposin                                                                        |
| PSCD2       | 48972289   | 48985571   | 19q13.33 | Cytohesin-2                                                                       |
| PSG3        | 43225790   | 43244721   | 19q13.2  | Pregnancy-specific beta-1-glycoprotein 3                                          |
| PSG9        | 43715943   | 43773682   | 19q13.31 | Pregnancy-specific beta-1-glycoprotein 9                                          |
| PSMA1       | 14515329   | 14665181   | 11p15.2  | Proteasome subunit alpha type-1                                                   |
| PSMA3       | 58711549   | 58738730   | 14q23.1  | Proteasome subunit alpha type-3                                                   |
| PSMA4       | 78832747   | 78841604   | 15q25.1  | Proteasome subunit alpha type-4                                                   |
| PSMA6       | 35747839   | 35786699   | 14q13.2  | Proteasome subunit alpha type-6                                                   |
| PSMB4       | 151372010  | 151374420  | 1q21.3   | Proteasome subunit beta type-4                                                    |
| PSMB6       | 4699439    | 4701790    | 17p13.2  | Proteasome subunit beta type-6                                                    |
| PSMB8       | 32808494   | 32812480   | 6p21.32  | Proteasome subunit beta type-8                                                    |
| PSMC3       | 47440320   | 47447993   | 11p11.2  | 26S protease regulatory subunit 6A                                                |
| PSMD12      | 65334032   | 65362743   | 17q24.2  | 26S proteasome non-ATPase regulatory subunit 12                                   |

|         |           |           |          |                                                                                                      |
|---------|-----------|-----------|----------|------------------------------------------------------------------------------------------------------|
| PSME1   | 24605367  | 24608176  | 14q12    | Proteasome activator complex subunit 1                                                               |
| PSME2   | 24612574  | 24616779  | 14q12    | Proteasome activator complex subunit 2                                                               |
| PSME3   | 40976402  | 40995774  | 17q21.31 | Proteasome activator complex subunit 3                                                               |
| PSPC1   | 20248896  | 20357142  | 13q12.11 | Paraspeckle component 1                                                                              |
| PSTPIP1 | 77285700  | 77329673  | 15q24.3  | Proline-serine-threonine phosphatase-interacting protein 1                                           |
| PTE1    | 44470360  | 44486045  | 20q13.12 | Acyl-coenzyme A thioesterase 8                                                                       |
| PTEN    | 89622870  | 89731687  | 10q23.31 | Phosphatidylinositol 3,4,5-trisphosphate 3-phosphatase and dual-specificity protein phosphatase PTEN |
| PTGES2  | 130882972 | 130890741 | 9q34.11  | Prostaglandin E synthase 2                                                                           |
| PTGES3  | 57057127  | 57082159  | 12q13.3  | Prostaglandin E synthase 3                                                                           |
| PTGS1   | 125132824 | 125157982 | 9q33.2   | Prostaglandin G/H synthase 1                                                                         |
| PTK9    | 44187526  | 44200178  | 12q12    | Twinfilin-1                                                                                          |
| PTK9L   | 52262626  | 52273276  | 3p21.2   | Twinfilin-2                                                                                          |
| PTMA    | 232571605 | 232578251 | 2q37.1   | Prothymosin alpha                                                                                    |
| PTMS    | 6874682   | 6880116   | 12p13.31 | Parathymosin                                                                                         |
| PTPN1   | 49126891  | 49201299  | 20q13.13 | Tyrosine-protein phosphatase non-receptor type 1                                                     |
| PTPN6   | 7055631   | 7070479   | 12p13.31 | Tyrosine-protein phosphatase non-receptor type 6                                                     |
| PTPRA   | 2844830   | 3019722   | 20p13    | Receptor-type tyrosine-protein phosphatase alpha                                                     |
| PTTG1   | 159848829 | 159855748 | 5q33.3   | Securin                                                                                              |
| PTTG1IP | 46269500  | 46293752  | 21q22.3  | Pituitary tumor-transforming gene 1 protein-interacting protein                                      |
| PUS1    | 132413745 | 132428406 | 12q24.33 | tRNA pseudouridine synthase A, mitochondrial                                                         |
| PVRL4   | 161040785 | 161059389 | 1q23.3   | Nectin-4                                                                                             |
| PWP1    | 108079509 | 108106944 | 12q23.3  | Periodic tryptophan protein 1 homolog                                                                |
| PYGB    | 25228705  | 25278650  | 20p11.21 | Glycogen phosphorylase, brain form                                                                   |
| PYGO2   | 154929502 | 154936329 | 1q21.3   | Pygopus homolog 2                                                                                    |
| QDPR    | 17461884  | 17513857  | 4p15.32  | Dihydropteridine reductase                                                                           |
| RAB11A  | 66018392  | 66184329  | 15q22.31 | Ras-related protein Rab-11A                                                                          |
| RAB11B  | 8454865   | 8469318   | 19p13.2  | Ras-related protein Rab-11B                                                                          |
| RAB13   | 153954127 | 153958834 | 1q21.3   | Ras-related protein Rab-13                                                                           |
| RAB13   | 153954127 | 153958834 | 1q21.3   | Ras-related protein Rab-13                                                                           |
| RAB27A  | 55495164  | 55611311  | 15q21.3  | Ras-related protein Rab-27A                                                                          |
| RAB27A  | 55495164  | 55611311  | 15q21.3  | Ras-related protein Rab-27A                                                                          |
| RAB2B   | 21927179  | 21945132  | 14q11.2  | Ras-related protein Rab-2B                                                                           |
| RAB31   | 9708162   | 9862548   | 18p11.22 | Ras-related protein Rab-31                                                                           |
| RAB35   | 120532899 | 120555306 | 12q24.23 | Ras-related protein Rab-35                                                                           |
| RAB3IL1 | 61664773  | 61687741  | 11q12.2  | Guanine nucleotide exchange factor for Rab-3A                                                        |
| RAB4A   | 229406822 | 229441641 | 1q42.13  | Ras-related protein Rab-4A                                                                           |
| RAB5A   | 19988571  | 20026667  | 3p24.3   | Ras-related protein Rab-5A                                                                           |
| RAB5B   | 56367697  | 56388490  | 12q13.2  | Ras-related protein Rab-5B                                                                           |
| RAB7L1  | 205737114 | 205744588 | 1q32.1   | Ras-related protein Rab-7L1                                                                          |
| RAB8A   | 16222439  | 16245044  | 19p13.12 | Ras-related protein Rab-8A                                                                           |
| RAB9A   | 13707244  | 13728625  | Xp22.2   | Ras-related protein Rab-9A                                                                           |
| RABAC1  | 42460833  | 42463542  | 19q13.2  | Prenylated Rab acceptor protein 1                                                                    |
| RABL2B  | 51205929  | 51222091  | 22q13.33 | Rab-like protein 2B                                                                                  |
| RACGAP1 | 50370706  | 50426919  | 12q13.12 | Rac GTPase-activating protein 1                                                                      |
| RAD1    | 34905369  | 34919094  | 5p13.2   | Cell cycle checkpoint protein RAD1                                                                   |
| RAD17   | 68665120  | 68710628  | 5q13.2   | Cell cycle checkpoint protein RAD17                                                                  |
| RAD18   | 8817088   | 9005457   | 3p25.3   | E3 ubiquitin-protein ligase RAD18                                                                    |
| RAD23B  | 110045418 | 110094475 | 9q31.2   | UV excision repair protein RAD23 homolog B                                                           |
| RAD51   | 40986972  | 41024354  | 15q15.1  | DNA repair protein RAD51 homolog 1                                                                   |
| RAD51L1 | 68286496  | 69196935  | 14q24.1  | DNA repair protein RAD51 homolog 2                                                                   |
| RAD51L3 | 33426811  | 33448541  | 17q12    | DNA repair protein RAD51 homolog 4                                                                   |
| RAG2    | 36597124  | 36619829  | 11p12    | V(D)J recombination-activating protein 2                                                             |

|               |           |           |          |                                                              |
|---------------|-----------|-----------|----------|--------------------------------------------------------------|
| RAMP1         | 238767536 | 238820756 | 2q37.3   | Receptor activity-modifying protein 1                        |
| RAMP1         | 238767536 | 238820756 | 2q37.3   | Receptor activity-modifying protein 1                        |
| RAPGEF3       | 48128455  | 48164823  | 12q13.11 | Rap guanine nucleotide exchange factor 3                     |
| RARB          | 25215823  | 25639423  | 3p24.2   | Retinoic acid receptor beta                                  |
| RARRES2       | 150035408 | 150038763 | 7q36.1   | Retinoic acid receptor responder protein 2                   |
| RARRES3       | 63304281  | 63313934  | 11q12.3  | Retinoic acid receptor responder protein 3                   |
| RASD2         | 35936915  | 35950048  | 22q12.3  | GTP-binding protein Rhes                                     |
| RASSF5        | 206680879 | 206762616 | 1q32.1   | Ras association domain-containing protein 5                  |
| RB1           | 48877887  | 49056122  | 13q14.2  | Retinoblastoma-associated protein                            |
| RBBP4         | 33116743  | 33151812  | 1p35.1   | Histone-binding protein RBBP4                                |
| RBBP5         | 205055270 | 205091143 | 1q32.1   | Retinoblastoma-binding protein 5                             |
| RBM38         | 55966463  | 55984389  | 20q13.31 | RNA-binding protein 38                                       |
| RBM8A         | 145507598 | 145513536 | 1q21.1   | RNA-binding protein 8A                                       |
| RBMX          | 135930163 | 135962923 | Xq26.3   | RNA-binding motif protein, X chromosome                      |
| RBMX1F        | 24314689  | 24329129  | Yq11.223 | RNA-binding motif protein, Y chromosome, family 1 member F/J |
| RBP1          | 139236276 | 139258671 | 3q23     | Retinol-binding protein 1                                    |
| RBP4          | 95351444  | 95361501  | 10q23.33 | Retinol-binding protein 4                                    |
| RBP5          | 7276280   | 7281538   | 12p13.31 | Retinol-binding protein 5                                    |
| RCC1          | 28832455  | 28865812  | 1p35.3   | Regulator of chromosome condensation                         |
| RCV1          | 9799637   | 9808938   | 17p13.1  | Recoverin                                                    |
| REG4          | 120336641 | 120354283 | 1p12     | Regenerating islet-derived protein 4                         |
| RENBP         | 153200716 | 153210232 | Xq28     | N-acylglucosamine 2-epimerase                                |
| REXO4         | 136271186 | 136283164 | 9q34.2   | RNA exonuclease 4                                            |
| RFC3          | 34392186  | 34540695  | 13q13.2  | Replication factor C subunit 3                               |
| RFC4          | 186507669 | 186524847 | 3q27.3   | Replication factor C subunit 4                               |
| RFP2          | 50570024  | 50594617  | 13q14.2  | E3 ubiquitin-protein ligase TRIM13                           |
| RFXAP         | 37393361  | 37403241  | 13q13.3  | Regulatory factor X-associated protein                       |
| RGS18         | 192127587 | 192154945 | 1q31.2   | Regulator of G-protein signaling 18                          |
| RGS19         | 62704534  | 62711323  | 20q13.33 | Regulator of G-protein signaling 19                          |
| RGS2          | 192778169 | 192781403 | 1q31.2   | Regulator of G-protein signaling 2                           |
| RHAG          | 49572871  | 49604552  | 6p12.3   | Ammonium transporter Rh type A                               |
| RHOBTB1       | 62629196  | 62761198  | 10q21.2  | Rho-related BTB domain-containing protein 1                  |
| RHOC          | 113243728 | 113250056 | 1p13.2   | Rho-related GTP-binding protein RhoC                         |
| RHOD          | 66824289  | 66839484  | 11q13.2  | Rho-related GTP-binding protein RhoD                         |
| RHOH          | 40192673  | 40248587  | 4p14     | Rho-related GTP-binding protein RhoH                         |
| RILP          | 1549444   | 1553371   | 17p13.3  | Rab-interacting lysosomal protein                            |
| RIN1          | 66097713  | 66104311  | 11q13.2  | Ras and Rab interactor 1                                     |
| RLN1          | 5334969   | 5339873   | 9p24.1   | Prorolaxin H1                                                |
| RNASEH1       | 3592383   | 3606206   | 2p25.3   | Ribonuclease H1                                              |
| RNF12         | 73805052  | 73834452  | Xq13.2   | E3 ubiquitin-protein ligase RLIM                             |
| RNF182        | 13924677  | 13980533  | 6p23     | E3 ubiquitin-protein ligase RNF182                           |
| RNF183        | 116059373 | 116065656 | 9q32     | RING finger protein 183                                      |
| RNF26         | 119205237 | 119208023 | 11q23.3  | RING finger protein 26                                       |
| RNF40         | 30773066  | 30787628  | 16p11.2  | E3 ubiquitin-protein ligase BRE1B                            |
| RNF6          | 26706253  | 26796791  | 13q12.13 | E3 ubiquitin-protein ligase RNF6                             |
| RNF7          | 141457046 | 141466402 | 3q23     | RING-box protein 2                                           |
| RNP24         | 124069078 | 124083116 | 12q24.31 | Transmembrane emp24 domain-containing protein 2              |
| RNPEP         | 201951500 | 201975275 | 1q32.1   | Aminopeptidase B                                             |
| RNPS1         | 2303117   | 2318413   | 16p13.3  | RNA-binding protein with serine-rich domain 1                |
| RNU3IP2       | 51967446  | 51975957  | 3p21.2   | U3 small nucleolar RNA-interacting protein 2                 |
| RP11-444E17.2 | 44246480  | 44265458  | 6p21.1   | T-complex-associated testis-expressed protein 1              |
| RP13-36C9.1   | 134945598 | 134953994 | Xq26.3   | Cancer/testis antigen family 45 member A5                    |
| RPA2          | 28218035  | 28241257  | 1p35.3   | Replication protein A 32 kDa subunit                         |

|         |           |           |          |                                                                          |
|---------|-----------|-----------|----------|--------------------------------------------------------------------------|
| RPL10   | 153618315 | 153637504 | Xq28     | 60S ribosomal protein L10                                                |
| RPL10A  | 35436185  | 35438562  | 6p21.31  | 60S ribosomal protein L10a                                               |
| RPL11   | 24018269  | 24022915  | 1p36.11  | 60S ribosomal protein L11                                                |
| RPL13   | 89627065  | 89630950  | 16q24.3  | 60S ribosomal protein L13                                                |
| RPL14   | 40498783  | 40503861  | 3p22.1   | 60S ribosomal protein L14                                                |
| RPL18   | 49118585  | 49122793  | 19q13.33 | 60S ribosomal protein L18                                                |
| RPL23   | 37004118  | 37010096  | 17q12    | 60S ribosomal protein L23                                                |
| RPL24   | 101399935 | 101405626 | 3q12.3   | 60S ribosomal protein L24                                                |
| RPL26L1 | 172385732 | 172396774 | 5q35.1   | 60S ribosomal protein L26-like 1                                         |
| RPL27   | 41150290  | 41154976  | 17q21.31 | 60S ribosomal protein L27                                                |
| RPL28   | 55896713  | 55914612  | 19q13.42 | 60S ribosomal protein L28                                                |
| RPL31   | 101618177 | 101640494 | 2q11.2   | 60S ribosomal protein L31                                                |
| RPL32   | 12875984  | 12883087  | 3p25.2   | 60S ribosomal protein L32                                                |
| RPL34   | 109541722 | 109551568 | 4q25     | 60S ribosomal protein L34                                                |
| RPL35   | 127620159 | 127624260 | 9q33.3   | 60S ribosomal protein L35                                                |
| RPL35A  | 197676858 | 197683481 | 3q29     | 60S ribosomal protein L35a                                               |
| RPL36   | 5674958   | 5691887   | 19p13.3  | 60S ribosomal protein L36                                                |
| RPL39   | 118920467 | 118925606 | Xq24     | 60S ribosomal protein L39                                                |
| RPL7A   | 136215069 | 136218281 | 9q34.2   | 60S ribosomal protein L7a                                                |
| RPL9    | 39455744  | 39460568  | 4p14     | 60S ribosomal protein L9                                                 |
| RPLP0   | 120634489 | 120639038 | 12q24.23 | 60S acidic ribosomal protein P0                                          |
| RPN2    | 35806813  | 35870022  | 20q11.23 | Dolichyl-diphosphooligosaccharide--protein glycosyltransferase subunit 2 |
| RPP30   | 92631473  | 92668312  | 10q23.31 | Ribonuclease P protein subunit p30                                       |
| RPS11   | 49999622  | 50002946  | 19q13.33 | 40S ribosomal protein S11                                                |
| RPS13   | 17095936  | 17099334  | 11p15.1  | 40S ribosomal protein S13                                                |
| RPS16   | 39923847  | 39926588  | 19q13.2  | 40S ribosomal protein S16                                                |
| RPS17   | 82821158  | 82824972  | 15q25.2  | 40S ribosomal protein S17                                                |
| RPS20   | 56979854  | 56987069  | 8q12.1   | 40S ribosomal protein S20                                                |
| RPS21   | 60962172  | 60963576  | 20q13.33 | 40S ribosomal protein S21                                                |
| RPS25   | 118886422 | 118889401 | 11q23.3  | 40S ribosomal protein S25                                                |
| RPS26   | 56435637  | 56438116  | 12q13.2  | 40S ribosomal protein S26                                                |
| RPS28   | 8386042   | 8388224   | 19p13.2  | 40S ribosomal protein S28                                                |
| RPS3A   | 152020725 | 152025804 | 4q31.3   | 40S ribosomal protein S3a                                                |
| RPS4Y1  | 2709527   | 2800041   | Yp11.31  | 40S ribosomal protein S4, Y isoform 1                                    |
| RPS5    | 58897767  | 58906173  | 19q13.43 | 40S ribosomal protein S5                                                 |
| RPS7    | 3622795   | 3628509   | 2p25.3   | 40S ribosomal protein S7                                                 |
| RPS9    | 54704610  | 54752862  | 19q13.42 | 40S ribosomal protein S9                                                 |
| RPSA    | 39448180  | 39454033  | 3p22.1   | 40S ribosomal protein SA                                                 |
| RRAD    | 66955582  | 66959547  | 16q22.1  | GTP-binding protein RAD                                                  |
| RRAS    | 50138549  | 50143458  | 19q13.33 | Ras-related protein R-Ras                                                |
| RRM1    | 4115937   | 4160106   | 11p15.4  | Ribonucleoside-diphosphate reductase large subunit                       |
| RSAD2   | 7005937   | 7038370   | 2p25.2   | Radical S-adenosyl methionine domain-containing protein 2                |
| RSPO3   | 127439749 | 127518910 | 6q22.33  | R-spondin-3                                                              |
| RSU1    | 16632610  | 16859527  | 10p13    | Ras suppressor protein 1                                                 |
| RTKN    | 74652963  | 74669549  | 2p13.1   | Rhotekin                                                                 |
| RUTBC3  | 40766595  | 40806293  | 22q13.1  | Small G protein signaling modulator 3                                    |
| RUVBL1  | 127783621 | 127872757 | 3q21.3   | RuvB-like 1                                                              |
| RUVBL2  | 49496705  | 49519252  | 19q13.33 | RuvB-like 2                                                              |
| RWDD1   | 116892530 | 116918838 | 6q22.1   | RWD domain-containing protein 1                                          |
| RWDD2   | 30376705  | 30391699  | 21q21.3  | RWD domain-containing protein 2B                                         |
| S100A11 | 152004982 | 152020383 | 1q21.3   | Protein S100-A11                                                         |
| S100A16 | 153579362 | 153585621 | 1q21.3   | Protein S100-A16                                                         |

|          |             |             |          |                                                                                  |
|----------|-------------|-------------|----------|----------------------------------------------------------------------------------|
| S100A3   | 153519805   | 153521848   | 1q21.3   | Protein S100-A3                                                                  |
| S100A4   | 153516089   | 153522612   | 1q21.3   | Protein S100-A4                                                                  |
| S100A6   | 153507075   | 153508720   | 1q21.3   | Protein S100-A6                                                                  |
| S100A7   | 153430220   | 153433177   | 1q21.3   | Protein S100-A7                                                                  |
| S100A9   | 153330330   | 153333503   | 1q21.3   | Protein S100-A9                                                                  |
| S100P    | 6694796     | 6698897     | 4p16.1   | Protein S100-P                                                                   |
| SAA1     | 18287721    | 18291524    | 11p15.1  | Serum amyloid A-1 protein                                                        |
| SAA4     | 18252896    | 18258440    | 11p15.1  | Serum amyloid A-4 protein                                                        |
| SAE1     | 47616531    | 47713886    | 19q13.32 | SUMO-activating enzyme subunit 1                                                 |
| SART2    | 116575336   | 116762424   | 6q22.1   | Dermatan-sulfate epimerase                                                       |
| SCAMP1   | 77656339    | 77776562    | 5q14.1   | Secretory carrier-associated membrane protein 1                                  |
| SCAMP3   | 155225770   | 155232221   | 1q22     | Secretory carrier-associated membrane protein 3                                  |
| SCAP2    | 26706681    | 27034858    | 7p15.2   | Src kinase-associated phosphoprotein 2                                           |
| SCARB1   | 125261402   | 125367214   | 12q24.31 | Scavenger receptor class B member 1                                              |
| SCGB1A1  | 62172575    | 62190667    | 11q12.3  | Uteroglobin                                                                      |
| SCGB1A1  | 62172575    | 62190667    | 11q12.3  | Uteroglobin                                                                      |
| SCHIP1   | 159557650   | 159615149   | 3q25.33  | Schwannomin-interacting protein 1                                                |
| SCIN     | 12610203    | 12693228    | 7p21.3   | Adseverin                                                                        |
| SCLY     | 238969530   | 239008054   | 2q37.3   | Selenocysteine lyase                                                             |
| SCMH1    | 41492872    | 41707826    | 1p34.2   | Polycomb protein SCMH1                                                           |
| SCNM1    | 151129140   | 151142773   | 1q21.3   | Sodium channel modifier 1                                                        |
| SCO1     | 10583654    | 10601692    | 17p13.1  | Protein SCO1 homolog, mitochondrial                                              |
| SCYB6    | 73,836,497  | 73,849,064  | 4q13.3   | Small Inducible Cytokine Subfamily B (Cys-X-Cys)                                 |
| SCYD1    | 57406370    | 57418960    | 16q21    | Fractalkine                                                                      |
| SCYE1    | 106,315,544 | 106,349,226 | 4q24     | Small Inducible Cytokine Subfamily E, Member 1 (Endothelial Monocyte-Activating) |
| SCYL3    | 169818772   | 169863408   | 1q24.2   | Protein-associating with the carboxyl-terminal domain of ezrin                   |
| SDC1     | 20400558    | 20425194    | 2p24.1   | Syndecan-1                                                                       |
| SDC3     | 31342314    | 31381608    | 1p35.2   | Syndecan-3                                                                       |
| SDCCAG3  | 139296377   | 139305061   | 9q34.3   | Serologically defined colon cancer antigen 3                                     |
| SDF2     | 26975374    | 26989207    | 17q11.2  | Stromal cell-derived factor 2                                                    |
| SDHD     | 111957497   | 111990353   | 11q23.1  | Succinate dehydrogenase [ubiquinone] cytochrome b small subunit, mitochondrial   |
| SDPR     | 192699028   | 192711981   | 2q32.3   | Serum deprivation-response protein                                               |
| SEC22C   | 42589461    | 42642572    | 3p22.1   | Vesicle-trafficking protein SEC22c                                               |
| SEC23B   | 18488137    | 18542059    | 20p11.23 | Protein transport protein Sec23B                                                 |
| SEC24D   | 119643978   | 119759838   | 4q26     | Protein transport protein Sec24D                                                 |
| SELL     | 169659808   | 169680839   | 1q24.2   | L-selectin                                                                       |
| SEMA3D   | 84624869    | 84816171    | 7q21.11  | Semaphorin-3D                                                                    |
| SEMA4F   | 74881355    | 74909186    | 2p13.1   | Semaphorin-4F                                                                    |
| SERF2    | 44069285    | 44094787    | 15q15.3  | Small EDRK-rich factor 2                                                         |
| SERINC3  | 43124862    | 43150750    | 20q13.12 | Serine incorporator 3                                                            |
| SERPINA5 | 95027779    | 95059457    | 14q32.13 | Plasma serine protease inhibitor                                                 |
| SERPINA7 | 105277197   | 105282729   | Xq22.3   | Thyroxine-binding globulin                                                       |
| SERPINB4 | 61304493    | 61311532    | 18q21.33 | Serpin B4                                                                        |
| SERPIND1 | 21128167    | 21142008    | 22q11.21 | Heparin cofactor 2                                                               |
| SERPINE1 | 100770370   | 100782547   | 7q22.1   | Plasminogen activator inhibitor 1                                                |
| SERPING1 | 57364860    | 57382326    | 11q12.1  | Plasma protease C1 inhibitor                                                     |
| SERTAD1  | 40927499    | 40931932    | 19q13.2  | SERTA domain-containing protein 1                                                |
| SERTAD4  | 210406144   | 210419976   | 1q32.2   | SERTA domain-containing protein 4                                                |
| SESN2    | 28586038    | 28609002    | 1p35.3   | Sestrin-2                                                                        |
| SET      | 131445703   | 131458679   | 9q34.11  | Protein SET                                                                      |
| SF3A1    | 30727977    | 30752936    | 22q12.2  | Splicing factor 3A subunit 1                                                     |
| SF3A2    | 2236520     | 2248678     | 19p13.3  | Splicing factor 3A subunit 2                                                     |

|          |           |           |          |                                                                        |
|----------|-----------|-----------|----------|------------------------------------------------------------------------|
| SFN      | 27189633  | 27190947  | 1p36.11  | 14-3-3 protein sigma                                                   |
| SFRS2    | 74730197  | 74733456  | 17q25.1  | Serine/arginine-rich splicing factor 2                                 |
| SFTPD    | 81697496  | 81742370  | 10q22.3  | Pulmonary surfactant-associated protein D                              |
| SFXN2    | 104474295 | 104503249 | 10q24.32 | Sideroflexin-2                                                         |
| SGCD     | 155297354 | 156194799 | 5q33.2   | Delta-sarcoglycan                                                      |
| SGK      | 134490384 | 134639250 | 6q23.2   | Serine/threonine-protein kinase Sgk1                                   |
| SGNE1    | 32933877  | 32989299  | 15q13.3  | Neuroendocrine protein 7B2                                             |
| SGTA     | 2754712   | 2783369   | 19p13.3  | Small glutamine-rich tetratricopeptide repeat-containing protein alpha |
| SH2D1A   | 123480194 | 123507005 | Xq25     | SH2 domain-containing protein 1A                                       |
| SH2D1B   | 162365056 | 162381928 | 1q23.3   | SH2 domain-containing protein 1B                                       |
| SH2D3A   | 6752171   | 6767599   | 19p13.3  | SH2 domain-containing protein 3A                                       |
| SH3BGR13 | 26605667  | 26608007  | 1p36.11  | SH3 domain-binding glutamic acid-rich-like protein 3                   |
| SH3BP1   | 38030661  | 38062939  | 22q13.1  | SH3 domain-binding protein 1                                           |
| SH3GL1   | 4360367   | 4400544   | 19p13.3  | Endophilin-A2                                                          |
| SH3GL2   | 17579080  | 17797127  | 9p22.2   | Endophilin-A1                                                          |
| SH3GLB1  | 87170259  | 87213867  | 1p22.3   | Endophilin-B1                                                          |
| SH3PX3   | 75940247  | 75954642  | 15q24.2  | Sorting nexin-33                                                       |
| SIGIRR   | 405716    | 417455    | 11p15.5  | Single Ig IL-1-related receptor                                        |
| SIGLEC9  | 51628165  | 51639908  | 19q13.41 | Sialic acid-binding Ig-like lectin 9                                   |
| SIRT7    | 79869815  | 79879199  | 17q25.3  | NAD-dependent protein deacetylase sirtuin-7                            |
| SKIP     | 228844666 | 229046361 | 2q36.3   | A-kinase anchor protein SPHKAP                                         |
| SKP1A    | 133484633 | 133512729 | 5q31.1   | S-phase kinase-associated protein 1                                    |
| SLC13A3  | 45186463  | 45304714  | 20q13.12 | Solute carrier family 13 member 3                                      |
| SLC16A7  | 59989848  | 60176395  | 12q14.1  | Monocarboxylate transporter 2                                          |
| SLC17A3  | 25833294  | 25882514  | 6p22.2   | Sodium-dependent phosphate transport protein 4                         |
| SLC18A1  | 20002366  | 20040717  | 8p21.3   | Chromaffin granule amine transporter                                   |
| SLC19A3  | 228549926 | 228582728 | 2q36.3   | Thiamine transporter 2                                                 |
| SLC1A4   | 65215611  | 65250999  | 2p14     | Neutral amino acid transporter A                                       |
| SLC1A7   | 53552855  | 53608289  | 1p32.3   | Excitatory amino acid transporter 5                                    |
| SLC20A2  | 42273993  | 42397069  | 8p11.21  | Sodium-dependent phosphate transporter 2                               |
| SLC22A5  | 131705444 | 131731306 | 5q31.1   | Solute carrier family 22 member 5                                      |
| SLC22A8  | 62756626  | 62783311  | 11q12.3  | Solute carrier family 22 member 8                                      |
| SLC25A10 | 79670404  | 79688042  | 17q25.3  | Mitochondrial dicarboxylate carrier                                    |
| SLC25A15 | 41363548  | 41384247  | 13q14.11 | Mitochondrial ornithine transporter 1                                  |
| SLC25A18 | 18043139  | 18073760  | 22q11.21 | Mitochondrial glutamate carrier 2                                      |
| SLC25A19 | 73269073  | 73285591  | 17q25.1  | Mitochondrial thiamine pyrophosphate carrier                           |
| SLC25A20 | 48894369  | 48936426  | 3p21.31  | Mitochondrial carnitine/acylcarnitine carrier protein                  |
| SLC25A4  | 186064395 | 186071536 | 4q35.1   | ADP/ATP translocase 1                                                  |
| SLC25A6  | 1505045   | 1511617   | Xp22.33  | ADP/ATP translocase 3                                                  |
| SLC27A3  | 153746830 | 153752633 | 1q21.3   | Long-chain fatty acid transport protein 3                              |
| SLC2A3   | 8071826   | 8088871   | 12p13.31 | Solute carrier family 2, facilitated glucose transporter member 3      |
| SLC2A5   | 9095166   | 9148537   | 1p36.23  | Solute carrier family 2, facilitated glucose transporter member 5      |
| SLC2A6   | 136336217 | 136344259 | 9q34.2   | Solute carrier family 2, facilitated glucose transporter member 6      |
| SLC2A9   | 9772777   | 10056560  | 4p16.1   | Solute carrier family 2, facilitated glucose transporter member 9      |
| SLC31A1  | 115983808 | 116028674 | 9q32     | High affinity copper uptake protein 1                                  |
| SLC31A2  | 115913222 | 115926417 | 9q32     | Probable low affinity copper uptake protein 2                          |
| SLC33A1  | 155538813 | 155572218 | 3q25.31  | Acetyl-coenzyme A transporter 1                                        |
| SLC35B1  | 47778305  | 47786376  | 17q21.33 | Solute carrier family 35 member B1                                     |
| SLC35C2  | 44978167  | 44993043  | 20q13.12 | Solute carrier family 35 member C2                                     |

|         |            |            |          |                                                            |
|---------|------------|------------|----------|------------------------------------------------------------|
| SLC38A2 | 46751972   | 46766650   | 12q13.11 | Sodium-coupled neutral amino acid transporter 2            |
| SLC38A5 | 48316920   | 48328644   | Xp11.23  | Sodium-coupled neutral amino acid transporter 5            |
| SLC39A7 | 33168222   | 33172216   | 6p21.32  | Zinc transporter SLC39A7                                   |
| SLC3A1  | 44502599   | 44548633   | 2p21     | Neutral and basic amino acid transport protein rBAT        |
| SLC44A5 | 75667816   | 76076801   | 1p31.1   | Choline transporter-like protein 5                         |
| SLC4A2  | 150754297  | 150773614  | 7q36.1   | Anion exchange protein 2                                   |
| SLC6A1  | 11034410   | 11080933   | 3p25.3   | Sodium- and chloride-dependent GABA transporter 1          |
| SLC6A13 | 329789     | 372039     | 12p13.33 | Sodium- and chloride-dependent GABA transporter 2          |
| SLC6A8  | 152953554  | 152962048  | Xq28     | Sodium- and chloride-dependent creatine transporter 1      |
| SLC7A4  | 21383007   | 21387129   | 22q11.21 | Cationic amino acid transporter 4                          |
| SLC7A9  | 33321415   | 33360672   | 19q13.11 | b(0,+)-type amino acid transporter 1                       |
| SLCO3A1 | 92396925   | 92715665   | 15q26.1  | Solute carrier organic anion transporter family member 3A1 |
| SLCO4A1 | 61273797   | 61317137   | 20q13.33 | Solute carrier organic anion transporter family member 4A1 |
| SLPI    | 43880880   | 43883205   | 20q13.12 | Antileukoproteinase                                        |
| SMA3    | 58711549   | 58738730   | 14q23.1  | Proteasome subunit alpha type-3                            |
| SMAD1   | 146402346  | 146479231  | 4q31.21  | Mothers against decapentaplegic homolog 1                  |
| SMAD2   | 45357922   | 45457515   | 18q21.1  | Mothers against decapentaplegic homolog 2                  |
| SMAF1   | 38,581,195 | 38,588,463 | 20q11.23 | Small Adipocyte Factor 1                                   |
| SMN1    | 70220768   | 70249769   | 5q13.2   | Survival motor neuron protein                              |
| SMOC1   | 70320848   | 70499083   | 14q24.2  | SPARC-related modular calcium-binding protein 1            |
| SMTN    | 31460091   | 31500743   | 22q12.2  | Smoothelin                                                 |
| SMU1    | 33041762   | 33076665   | 9p21.1   | WD40 repeat-containing protein SMU1                        |
| SMYD3   | 245912642  | 246670614  | 1q44     | Histone-lysine N-methyltransferase SMYD3                   |
| SNAI1   | 48599536   | 48605423   | 20q13.13 | Zinc finger protein SNAI1                                  |
| SNAPC1  | 62229075   | 62263146   | 14q23.2  | snRNA-activating protein complex subunit 1                 |
| SNCB    | 176047085  | 176057530  | 5q35.2   | Beta-synuclein                                             |
| SNCG    | 88718375   | 88723017   | 10q23.2  | Gamma-synuclein                                            |
| SND1    | 127292234  | 127732661  | 7q32.1   | Staphylococcal nuclease domain-containing protein 1        |
| SNRPA1  | 101821715  | 101835487  | 15q26.3  | U2 small nuclear ribonucleoprotein A'                      |
| SNRPD1  | 19192228   | 19210417   | 18q11.2  | Small nuclear ribonucleoprotein Sm D1                      |
| SNRPD2  | 46190712   | 46195827   | 19q13.32 | Small nuclear ribonucleoprotein Sm D2                      |
| SNTA1   | 31995761   | 32031698   | 20q11.21 | Alpha-1-syntrophin                                         |
| SNX10   | 26331541   | 26413949   | 7p15.2   | Sorting nexin-10                                           |
| SNX8    | 2291405    | 2393953    | 7p22.3   | Sorting nexin-8                                            |
| SNX9    | 158244296  | 158366109  | 6q25.3   | Sorting nexin-9                                            |
| SOAT1   | 179262925  | 179327815  | 1q25.2   | Sterol O-acyltransferase 1                                 |
| SOCS3   | 76352864   | 76356158   | 17q25.3  | Suppressor of cytokine signaling 3                         |
| SOCS5   | 46926091   | 46990268   | 2p21     | Suppressor of cytokine signaling 5                         |
| SORD    | 45315302   | 45369383   | 15q21.1  | Sorbitol dehydrogenase                                     |
| SORT1   | 109852192  | 109940573  | 1p13.3   | Sortilin                                                   |
| SOX10   | 38366693   | 38383429   | 22q13.1  | Transcription factor SOX-10                                |
| SOX5    | 23682440   | 24103966   | 12p12.1  | Transcription factor SOX-5                                 |
| SPARC   | 151040657  | 151066726  | 5q33.1   | SPARC                                                      |
| SPARC   | 151040657  | 151066726  | 5q33.1   | SPARC                                                      |
| SPATA22 | 3343313    | 3417146    | 17p13.2  | Spermatogenesis-associated protein 22                      |
| SPATA6  | 48761044   | 48937845   | 1p33     | Spermatogenesis-associated protein 6                       |
| SPHK2   | 49122548   | 49133974   | 19q13.33 | Sphingosine kinase 2                                       |
| SPINT1  | 41136216   | 41150405   | 15q15.1  | Kunitz-type protease inhibitor 1                           |

|          |           |           |          |                                                                          |
|----------|-----------|-----------|----------|--------------------------------------------------------------------------|
| SPN      | 29674300  | 29682187  | 16p11.2  | Leukosialin                                                              |
| SPOCK2   | 73818793  | 73848790  | 10q22.1  | Testican-2                                                               |
| SPP1     | 88896819  | 88904562  | 4q22.1   | Osteopontin                                                              |
| SPTLC2   | 77972340  | 78083116  | 14q24.3  | Serine palmitoyltransferase 2                                            |
| SQLE     | 126010739 | 126034525 | 8q24.13  | Squalene monooxygenase                                                   |
| SQRDL    | 45923346  | 45983492  | 15q21.1  | Sulfide:quinone oxidoreductase, mitochondrial                            |
| SRD5A1   | 6633456   | 6669675   | 5p15.31  | 3-oxo-5-alpha-steroid 4-dehydrogenase 1                                  |
| SRPR     | 126132814 | 126139039 | 11q24.2  | Signal recognition particle receptor subunit alpha                       |
| SS18     | 23596578  | 23671181  | 18q11.2  | Protein SSXT                                                             |
| SSB      | 170648443 | 170668574 | 2q31.1   | Lupus La protein                                                         |
| SSBP2    | 80708840  | 81047616  | 5q14.1   | Single-stranded DNA-binding protein 2                                    |
| SSR3     | 156257929 | 156272973 | 3q25.31  | Translocon-associated protein subunit gamma                              |
| SSRP1    | 57093459  | 57103351  | 11q12.1  | FACT complex subunit SSRP1                                               |
| SSSCA1   | 65337901  | 65341413  | 11q13.1  | Sjogren syndrome/scleroderma autoantigen 1                               |
| SST      | 187386694 | 187388187 | 3q27.3   | Somatostatin                                                             |
| SSTR2    | 71161151  | 71167185  | 17q25.1  | Somatostatin receptor type 2                                             |
| SSU72    | 1477053   | 1510249   | 1p36.33  | RNA polymerase II subunit A C-terminal domain phosphatase SSU72          |
| ST14     | 130029457 | 130080271 | 11q24.3  | Suppressor of tumorigenicity 14 protein                                  |
| ST3GAL1  | 134467091 | 134584183 | 8q24.22  | CMP-N-acetylneuraminate-beta-galactosamide-alpha-2,3-sialyltransferase 1 |
| ST5      | 8714898   | 8932498   | 11p15.4  | Suppression of tumorigenicity 5 protein                                  |
| ST7      | 116593292 | 116870157 | 7q31.2   | Suppressor of tumorigenicity 7 protein                                   |
| STAM2    | 152973315 | 153032506 | 2q23.3   | Signal transducing adapter molecule 2                                    |
| STAMBP   | 74056086  | 74100786  | 2p13.1   | STAM-binding protein                                                     |
| STAR     | 38001167  | 38008783  | 8p11.23  | Steroidogenic acute regulatory protein, mitochondrial                    |
| STAU2    | 74332604  | 74659943  | 8q21.11  | Double-stranded RNA-binding protein Staufen homolog 2                    |
| STC2     | 172741716 | 172756506 | 5q35.1   | Stanniocalcin-2                                                          |
| STIM1    | 3875757   | 4114439   | 11p15.4  | Stromal interaction molecule 1                                           |
| STK11    | 1189406   | 1228428   | 19p13.3  | Serine/threonine-protein kinase STK11                                    |
| STK17B   | 196998290 | 197041227 | 2q32.3   | Serine/threonine-protein kinase 17B                                      |
| STK24    | 99102455  | 99230194  | 13q32.2  | Serine/threonine-protein kinase 24                                       |
| STK25    | 242432089 | 242449145 | 2q37.3   | Serine/threonine-protein kinase 25                                       |
| STK38L   | 27396901  | 27478892  | 12p11.23 | Serine/threonine-protein kinase 38-like                                  |
| STMN2    | 80523049  | 80578410  | 8q21.13  | Stathmin-2                                                               |
| STOM     | 124101355 | 124132531 | 9q33.2   | Erythrocyte band 7 integral membrane protein                             |
| STOML2   | 35099888  | 35103154  | 9p13.3   | Stomatin-like protein 2, mitochondrial                                   |
| STUB1    | 730224    | 732870    | 16p13.3  | E3 ubiquitin-protein ligase CHIP                                         |
| STX6     | 180941861 | 180992047 | 1q25.3   | Syntaxin-6                                                               |
| STYXL1   | 75625656  | 75677322  | 7q11.23  | Serine/threonine/tyrosine-interacting-like protein 1                     |
| SUCNR1   | 151591431 | 151602405 | 3q25.1   | Succinate receptor 1                                                     |
| SUFU     | 104263744 | 104393292 | 10q24.32 | Suppressor of fused homolog                                              |
| SULT1A1  | 28616903  | 28634946  | 16p11.2  | Sulfotransferase 1A1                                                     |
| SULT2A1  | 48373723  | 48389654  | 19q13.33 | Bile salt sulfotransferase                                               |
| SUMO1    | 203070903 | 203103331 | 2q33.1   | Small ubiquitin-related modifier 1                                       |
| SUMO2    | 73163408  | 73179078  | 17q25.1  | Small ubiquitin-related modifier 2                                       |
| SUPT5H   | 39926796  | 39967310  | 19q13.2  | Transcription elongation factor SPT5                                     |
| SURF2    | 136223428 | 136228045 | 9q34.2   | Surfeit locus protein 2                                                  |
| SURF4    | 136228325 | 136242970 | 9q34.2   | Surfeit locus protein 4                                                  |
| SURVIVIN | 76210267  | 76221717  | 17q25.3  | Baculoviral IAP repeat-containing protein 5                              |
| SUV39H1  | 48553945  | 48567403  | Xp11.23  | Histone-lysine N-methyltransferase SUV39H1                               |
| SUV39H2  | 14920819  | 14946314  | 10p13    | Histone-lysine N-methyltransferase SUV39H2                               |
| SYNGR3   | 2039661   | 2044276   | 16p13.3  | Synaptogyrin-3                                                           |

|         |           |           |          |                                                                       |
|---------|-----------|-----------|----------|-----------------------------------------------------------------------|
| SYT12   | 66774249  | 66818334  | 11q13.2  | Synaptotagmin-12                                                      |
| SYT3    | 51124564  | 51171651  | 19q13.33 | Synaptotagmin-3                                                       |
| SYTL1   | 27668513  | 27680421  | 1p36.11  | Synaptotagmin-like protein 1                                          |
| TAC3    | 57403784  | 57422667  | 12q13.3  | Tachykinin-3                                                          |
| TACSTD1 | 47572297  | 47614740  | 2p21     | Epithelial cell adhesion molecule                                     |
| TACSTD2 | 59041099  | 59043166  | 1p32.1   | Tumor-associated calcium signal transducer 2                          |
| TAF11   | 34845555  | 34855866  | 6p21.31  | Transcription initiation factor TFIID subunit 11                      |
| TAF1B   | 9983483   | 10074545  | 2p25.1   | TATA box-binding protein-associated factor RNA polymerase I subunit B |
| TAF2I   | 34845555  | 34855866  | 6p21.31  | Transcription initiation factor TFIID subunit 11                      |
| TAF6    | 99704693  | 99717464  | 7q22.1   | Transcription initiation factor TFIID subunit 6                       |
| TAF9B   | 77385245  | 77395203  | Xq21.1   | Transcription initiation factor TFIID subunit 9B                      |
| TAGLN2  | 159887897 | 159895522 | 1q23.2   | Transgelin-2                                                          |
| TAP1    | 32812986  | 32821755  | 6p21.32  | Antigen peptide transporter 1                                         |
| TARS    | 33440802  | 33469644  | 5p13.3   | Threonine--tRNA ligase, cytoplasmic                                   |
| TBL2    | 72983262  | 72993121  | 7q11.23  | Transducin beta-like protein 2                                        |
| TBX3    | 115108059 | 115121969 | 12q24.21 | T-box transcription factor TBX3                                       |
| TCEA1   | 54879112  | 54935089  | 8q11.23  | Transcription elongation factor A protein 1                           |
| TCEAL1  | 102883632 | 102885881 | Xq22.2   | Transcription elongation factor A protein-like 1                      |
| TCEB3   | 24069645  | 24088549  | 1p36.11  | Transcription elongation factor B polypeptide 3                       |
| TCF19   | 31126319  | 31134936  | 6p21.33  | Transcription factor 19                                               |
| TCL1A   | 96176304  | 96180533  | 14q32.13 | T-cell leukemia/lymphoma protein 1A                                   |
| TCN1    | 59620273  | 59634048  | 11q12.1  | Transcobalamin-1                                                      |
| TD52    | 49411431  | 49493714  | 20q13.13 | Breast carcinoma-amplified sequence 4                                 |
| TEAD2   | 49843852  | 49865714  | 19q13.33 | Transcriptional enhancer factor TEF-4                                 |
| TEF     | 41763337  | 41795330  | 22q13.2  | Thyrotroph embryonic factor                                           |
| TEKT3   | 15207128  | 15244958  | 17p12    | Tektin-3                                                              |
| TERF1   | 73921099  | 73960357  | 8q21.11  | Telomeric repeat-binding factor 1                                     |
| TESC    | 117476728 | 117537284 | 12q24.22 | Calcineurin B homologous protein 3                                    |
| TEX11   | 69748790  | 70128581  | Xq13.1   | Testis-expressed sequence 11 protein                                  |
| TFAP2A  | 10393419  | 10419892  | 6p24.3   | Transcription factor AP-2-alpha                                       |
| TFAP2B  | 50786436  | 50815326  | 6p12.3   | Transcription factor AP-2-beta                                        |
| TFB1M   | 155578643 | 155635627 | 6q25.3   | Dimethyladenosine transferase 1, mitochondrial                        |
| TFF1    | 43782391  | 43786703  | 21q22.3  | Trefoil factor 1                                                      |
| TFF3    | 43731777  | 43735761  | 21q22.3  | Trefoil factor 3                                                      |
| TFPI2   | 93514709  | 93520303  | 7q21.3   | Tissue factor pathway inhibitor 2                                     |
| TFRC    | 195754054 | 195809060 | 3q29     | Transferrin receptor protein 1                                        |
| TGFBR2  | 30647994  | 30735634  | 3p24.1   | TGF-beta receptor type-2                                              |
| TGIF    | 3411606   | 3458409   | 18p11.31 | Homeobox protein TGIF1                                                |
| TGIF2   | 35201891  | 35222353  | 20q11.23 | Homeobox protein TGIF2                                                |
| TGM4    | 44916100  | 44956482  | 3p21.31  | Protein-glutamine gamma-glutamyltransferase 4                         |
| THAP11  | 67876213  | 67878097  | 16q22.1  | THAP domain-containing protein 11                                     |
| THRA    | 38214543  | 38250120  | 17q21.1  | Thyroid hormone receptor alpha                                        |
| THRAP5  | 867962    | 893218    | 19p13.3  | Mediator of RNA polymerase II transcription subunit 16                |
| THRAP6  | 118532952 | 118552501 | 8q24.11  | Mediator of RNA polymerase II transcription subunit 30                |
| TIMM13  | 2425622   | 2427892   | 19p13.3  | Mitochondrial import inner membrane translocase subunit Tim13         |
| TIMP1   | 47441712  | 47446188  | Xp11.23  | Metalloproteinase inhibitor 1                                         |
| TIMP3   | 33197687  | 33259030  | 22q12.3  | Metalloproteinase inhibitor 3                                         |
| TIMP4   | 12194551  | 12200851  | 3p25.2   | Metalloproteinase inhibitor 4                                         |
| TINF2   | 24708849  | 24711880  | 14q12    | TERF1-interacting nuclear factor 2                                    |
| TITF1   | 36985602  | 36990354  | 14q13.3  | Homeobox protein Nkx-2.1                                              |
| TLE1    | 84198598  | 84304220  | 9q21.32  | Transducin-like enhancer protein 1                                    |

|           |           |           |          |                                                                                |
|-----------|-----------|-----------|----------|--------------------------------------------------------------------------------|
| TLR7      | 12885202  | 12908499  | Xp22.2   | Toll-like receptor 7                                                           |
| TLX3      | 170736288 | 170739138 | 5q35.1   | T-cell leukemia homeobox protein 3                                             |
| TM4SF1    | 149086809 | 149095652 | 3q25.1   | Transmembrane 4 L6 family member 1                                             |
| TMC6      | 76106539  | 76128488  | 17q25.3  | Transmembrane channel-like protein 6                                           |
| TMED1     | 10943114  | 10946994  | 19p13.2  | Transmembrane emp24 domain-containing protein 1                                |
| TMED6     | 69377151  | 69385712  | 16q22.1  | Transmembrane emp24 domain-containing protein 6                                |
| TMEM126B  | 85339629  | 85347580  | 11q14.1  | Complex I assembly factor TMEM126B, mitochondrial                              |
| TMEM138   | 61129473  | 61136981  | 11q12.2  | Transmembrane protein 138                                                      |
| TMEM14C   | 10723148  | 10731362  | 6p24.2   | Transmembrane protein 14C                                                      |
| TMEM161B  | 87485450  | 87565293  | 5q14.3   | Transmembrane protein 161B                                                     |
| TMEM31    | 102965837 | 102968956 | Xq22.2   | Transmembrane protein 31                                                       |
| TMEM66    | 29920528  | 29940723  | 8p12     | Store-operated calcium entry-associated regulatory factor                      |
| TMEM8     | 55738007  | 55741647  | 19q13.42 | Lysoplasmalogenase                                                             |
| TMOD1     | 100263462 | 100364030 | 9q22.33  | Tropomodulin-1                                                                 |
| TNA       | 45043040  | 45077563  | 3p21.31  | Tetranectin                                                                    |
| TNF       | 31543344  | 31546113  | 6p21.33  | Tumor necrosis factor                                                          |
| TNFAIP1   | 26662628  | 26674035  | 17q11.2  | BTB/POZ domain-containing adapter for CUL3-mediated RhoA degradation protein 2 |
| TNFRSF10A | 23047965  | 23082639  | 8p21.3   | Tumor necrosis factor receptor superfamily member 10A                          |
| TNFRSF11B | 119935796 | 119964439 | 8q24.12  | Tumor necrosis factor receptor superfamily member 11B                          |
| TNFRSF12A | 3068446   | 3072384   | 16p13.3  | Tumor necrosis factor receptor superfamily member 12A                          |
| TNFRSF14  | 2487078   | 2496821   | 1p36.32  | Tumor necrosis factor receptor superfamily member 14                           |
| TNFRSF19L | 73087309  | 73108519  | 11q13.4  | Tumor necrosis factor receptor superfamily member 19L                          |
| TNFRSF1A  | 6437923   | 6451280   | 12p13.31 | Tumor necrosis factor receptor superfamily member 1A                           |
| TNFRSF9   | 7979907   | 8000926   | 1p36.23  | Tumor necrosis factor receptor superfamily member 9                            |
| TNFSF13   | 7461609   | 7464925   | 17p13.1  | Tumor necrosis factor ligand superfamily member 13                             |
| TNFSF14   | 6663148   | 6670599   | 19p13.3  | Tumor necrosis factor ligand superfamily member 14                             |
| TNFSF6    | 172628154 | 172636014 | 1q24.3   | Tumor necrosis factor ligand superfamily member 6                              |
| TNIP1     | 150409506 | 150473138 | 5q33.1   | TNFAIP3-interacting protein 1                                                  |
| TNK1      | 7283853   | 7293093   | 17p13.1  | Non-receptor tyrosine-protein kinase TNK1                                      |
| TNNC1     | 52485118  | 52488086  | 3p21.1   | Troponin C, slow skeletal and cardiac muscles                                  |
| TNNC2     | 44451853  | 44462384  | 20q13.12 | Troponin C, skeletal muscle                                                    |
| TNNI1     | 201373625 | 201398994 | 1q32.1   | Troponin I, slow skeletal muscle                                               |
| TNNI2     | 1860219   | 1862910   | 11p15.5  | Troponin I, fast skeletal muscle                                               |
| TNNI3     | 55663137  | 55669141  | 19q13.42 | Troponin I, cardiac muscle                                                     |
| TOB1      | 48939584  | 48945339  | 17q21.33 | Protein Tob1                                                                   |
| TOB2      | 41829496  | 41843027  | 22q13.2  | Protein Tob2                                                                   |
| TOLLIP    | 1295601   | 1330884   | 11p15.5  | Toll-interacting protein                                                       |
| TOMM22    | 39077953  | 39080818  | 22q13.1  | Mitochondrial import receptor subunit TOM22 homolog                            |
| TOR1A     | 132575223 | 132586413 | 9q34.11  | Torsin-1A                                                                      |
| TP53      | 7565097   | 7590856   | 17p13.1  | Cellular tumor antigen p53                                                     |

|         |            |            |          |                                                                       |
|---------|------------|------------|----------|-----------------------------------------------------------------------|
| TP53TG3 | 32684852   | 32688053   | 16p11.2  | TP53-target gene 3 protein                                            |
| TPD52   | 80870571   | 81143467   | 8q21.13  | Tumor protein D52                                                     |
| TPD52L2 | 62496596   | 62522898   | 20q13.33 | Tumor protein D54                                                     |
| TPI1    | 6976283    | 6980112    | 12p13.31 | Triosephosphate isomerase                                             |
| TPM1    | 63334831   | 63364114   | 15q22.2  | Tropomyosin alpha-1 chain                                             |
| TPSB1   | 1290697    | 1292555    | 16p13.3  | Tryptase alpha/beta-1                                                 |
| TPTE    | 10906201   | 11029719   | 21p11.1  | Putative tyrosine-protein phosphatase TPTE                            |
| TRA2A   | 23544399   | 23571660   | 7p15.3   | Transformer-2 protein homolog alpha                                   |
| TRADD   | 67188083   | 67194201   | 16q22.1  | Tumor necrosis factor receptor type 1-associated DEATH domain protein |
| TRAF2   | 139776364  | 139821059  | 9q34.3   | TNF receptor-associated factor 2                                      |
| TRAF4   | 27071002   | 27077974   | 17q11.2  | TNF receptor-associated factor 4                                      |
| TRAF6   | 36508577   | 36531822   | 11p12    | TNF receptor-associated factor 6                                      |
| TRAFD1  | 112563305  | 112591407  | 12q24.13 | TRAF-type zinc finger domain-containing protein 1                     |
| TRAM1   | 71485677   | 71520622   | 8q13.3   | Translocating chain-associated membrane protein 1                     |
| TRAP1   | 3701640    | 3767598    | 16p13.3  | Heat shock protein 75 kDa, mitochondrial                              |
| TRAPPC2 | 13730363   | 13752754   | Xp22.2   | Trafficking protein particle complex subunit 2                        |
| TREM1   | 41235664   | 41254457   | 6p21.1   | Triggering receptor expressed on myeloid cells 1                      |
| TREX2   | 152710178  | 152736045  | Xq28     | Three prime repair exonuclease 2                                      |
| TRIM22  | 5710919    | 5758319    | 11p15.4  | E3 ubiquitin-protein ligase TRIM22                                    |
| TRIM31  | 30070674   | 30080883   | 6p22.1   | E3 ubiquitin-protein ligase TRIM31                                    |
| TRIM32  | 119449581  | 119463579  | 9q33.1   | E3 ubiquitin-protein ligase TRIM32                                    |
| TRIM38  | 25963030   | 25987384   | 6p22.2   | E3 ubiquitin-protein ligase TRIM38                                    |
| TRIM7   | 180620924  | 180632293  | 5q35.3   | Tripartite motif-containing protein 7                                 |
| TRIM8   | 104404253  | 104418164  | 10q24.32 | Probable E3 ubiquitin-protein ligase TRIM8                            |
| TRIP10  | 6737936    | 6751537    | 19p13.3  | Cdc42-interacting protein 4                                           |
| TROVE2  | 193028552  | 193060907  | 1q31.2   | 60 kDa SS-A/Ro ribonucleoprotein                                      |
| TRPV2   | 16318856   | 16340317   | 17p11.2  | Transient receptor potential cation channel subfamily V member 2      |
| TSG101  | 18489883   | 18548779   | 11p15.1  | Tumor susceptibility gene 101 protein                                 |
| TSG101  | 18489883   | 18548779   | 11p15.1  | Tumor susceptibility gene 101 protein                                 |
| TSSC1   | 3192696    | 3381653    | 2p25.3   | Protein TSSC1                                                         |
| TSSK6   | 19623227   | 19626838   | 19p13.11 | Testis-specific serine/threonine-protein kinase 6                     |
| TTC2    | 41,976,421 | 42,021,376 | 17q21.2  | Tetratricopeptide Repeat Protein 2                                    |
| TTK     | 80713604   | 80752244   | 6q14.1   | Dual specificity protein kinase TTK                                   |
| TUBA6   | 49582519   | 49667114   | 12q13.12 | Tubulin alpha-1C chain                                                |
| TUBB2A  | 3153903    | 3157760    | 6p25.2   | Tubulin beta-2A chain                                                 |
| TUBE1   | 112391980  | 112408732  | 6q21     | Tubulin epsilon chain                                                 |
| TUBG1   | 40761694   | 40767252   | 17q21.2  | Tubulin gamma-1 chain                                                 |
| TWIST1  | 19060614   | 19157295   | 7p21.1   | Twist-related protein 1                                               |
| TWIST2  | 239756673  | 239795893  | 2q37.3   | Twist-related protein 2                                               |
| TXN2    | 36863083   | 36878077   | 22q12.3  | Thioredoxin, mitochondrial                                            |
| TXN2    | 36863083   | 36878077   | 22q12.3  | Thioredoxin, mitochondrial                                            |
| TYK2    | 10461209   | 10491352   | 19p13.2  | Non-receptor tyrosine-protein kinase TYK2                             |
| TYMS    | 657604     | 673578     | 18p11.32 | Thymidylate synthase                                                  |
| TYROBP  | 36395303   | 36399197   | 19q13.12 | TYRO protein tyrosine kinase-binding protein                          |
| U2AF1L4 | 36233365   | 36236346   | 19q13.12 | Splicing factor U2AF 26 kDa subunit                                   |
| UBADC1  | 138824815  | 138853226  | 9q34.3   | Ubiquitin-associated domain-containing protein 1                      |
| UBAP1   | 34179003   | 34252521   | 9p13.3   | Ubiquitin-associated protein 1                                        |
| UBD     | 29523292   | 29527702   | 6p22.1   | Ubiquitin D                                                           |
| UBE1C   | 69103881   | 69129559   | 3p14.1   | NEDD8-activating enzyme E1 catalytic subunit                          |
| UBE2A   | 118708501  | 118718381  | Xq24     | Ubiquitin-conjugating enzyme E2 A                                     |
| UBE2B   | 133706870  | 133727683  | 5q31.1   | Ubiquitin-conjugating enzyme E2 B                                     |
| UBE2B   | 133706870  | 133727683  | 5q31.1   | Ubiquitin-conjugating enzyme E2 B                                     |
| UBE2C   | 44441215   | 44445596   | 20q13.12 | Ubiquitin-conjugating enzyme E2 C                                     |

|         |             |             |          |                                                                |
|---------|-------------|-------------|----------|----------------------------------------------------------------|
| UBE2I   | 1355548     | 1377019     | 16p13.3  | SUMO-conjugating enzyme UBC9                                   |
| UBE2J1  | 90036344    | 90062567    | 6q15     | Ubiquitin-conjugating enzyme E2 J1                             |
| UBE2T   | 202300785   | 202311108   | 1q32.1   | Ubiquitin-conjugating enzyme E2 T                              |
| UBE2V2  | 48920960    | 48977268    | 8q11.21  | Ubiquitin-conjugating enzyme E2 variant 2                      |
| UBOX5   | 3088219     | 3140842     | 20p13    | RING finger protein 37                                         |
| UBXD2   | 135,741,619 | 135,785,063 | 2q21.3   | UBX Domain-Containing Protein 2                                |
| UBXD8   | 175874629   | 175937075   | 5q35.2   | FAS-associated factor 2                                        |
| UCHL1   | 41258430    | 41270472    | 4p13     | Ubiquitin carboxyl-terminal hydrolase isozyme L1               |
| UCP2    | 73685712    | 73694352    | 11q13.4  | Mitochondrial uncoupling protein 2                             |
| UFC1    | 161122566   | 161128646   | 1q23.3   | Ubiquitin-fold modifier-conjugating enzyme 1                   |
| UGB     | 62172575    | 62190667    | 11q12.3  | Uteroglobin                                                    |
| UGDH    | 39500375    | 39529931    | 4p14     | UDP-glucose 6-dehydrogenase                                    |
| UGT2B4  | 70345883    | 70391732    | 4q13.2   | UDP-glucuronosyltransferase 2B4                                |
| UGT2B7  | 69917081    | 69978705    | 4q13.2   | UDP-glucuronosyltransferase 2B7                                |
| UNRIP   | 16035325    | 16056412    | 12p12.3  | Serine-threonine kinase receptor-associated protein            |
| UQCRC2  | 21963981    | 21994981    | 16p12.2  | Cytochrome b-c1 complex subunit 2, mitochondrial               |
| UROD    | 45477819    | 45481247    | 1p34.1   | Uroporphyrinogen decarboxylase                                 |
| UROS    | 127477146   | 127511817   | 10q26.13 | Uroporphyrinogen-III synthase                                  |
| USP10   | 84733584    | 84813528    | 16q24.1  | Ubiquitin carboxyl-terminal hydrolase 10                       |
| USP13   | 179370543   | 179507189   | 3q26.33  | Ubiquitin carboxyl-terminal hydrolase 13                       |
| USP2    | 119225925   | 119252436   | 11q23.3  | Ubiquitin carboxyl-terminal hydrolase 2                        |
| USP30   | 109460894   | 109525831   | 12q24.11 | Ubiquitin carboxyl-terminal hydrolase 30                       |
| USP33   | 78161672    | 78225537    | 1p31.1   | Ubiquitin carboxyl-terminal hydrolase 33                       |
| USP5    | 6961292     | 6975796     | 12p13.31 | Ubiquitin carboxyl-terminal hydrolase 5                        |
| UTP14A  | 129040097   | 129063737   | Xq26.1   | U3 small nucleolar RNA-associated protein 14 homolog A         |
| UXS1    | 106709759   | 106810795   | 2q12.2   | UDP-glucuronic acid decarboxylase 1                            |
| VAMP1   | 6571403     | 6580153     | 12p13.31 | Vesicle-associated membrane protein 1                          |
| VAMP5   | 85811531    | 85820535    | 2p11.2   | Vesicle-associated membrane protein 5                          |
| VCL     | 75757872    | 75879918    | 10q22.2  | Vinculin                                                       |
| VDAC1   | 133307606   | 133340824   | 5q31.1   | Voltage-dependent anion-selective channel protein 1            |
| VDRIP   | 48627459    | 48669267    | 13q14.2  | Mediator of RNA polymerase II transcription subunit 4          |
| VEGFB   | 64002010    | 64006259    | 11q13.1  | Vascular endothelial growth factor B                           |
| VEGFC   | 177604689   | 177713881   | 4q34.3   | Vascular endothelial growth factor C                           |
| VIL2    | 159186773   | 159240444   | 6q25.3   | Ezrin                                                          |
| VILL    | 38029550    | 38048679    | 3p22.2   | Villin-like protein                                            |
| VPS18   | 41186628    | 41196173    | 15q15.1  | Vacuolar protein sorting-associated protein 18 homolog         |
| VSIG4   | 65241580    | 65259967    | Xq12     | V-set and immunoglobulin domain-containing protein 4           |
| VTI2    | 68113792    | 68141548    | 14q24.1  | Vesicle transport through interaction with t-SNAREs homolog 1B |
| VTN     | 26691290    | 26700110    | 17q11.2  | Vitronectin                                                    |
| WBP11   | 14939410    | 14956474    | 12p12.3  | WW domain-binding protein 11                                   |
| WBSCR1  | 73588575    | 73611431    | 7q11.23  | Eukaryotic translation initiation factor 4H                    |
| WBSCR27 | 73248920    | 73256865    | 7q11.23  | Williams-Beuren syndrome chromosomal region 27 protein         |
| WDR20   | 102605840   | 102691184   | 14q32.31 | WD repeat-containing protein 20                                |
| WDR68   | 61627822    | 61671639    | 17q23.3  | DDB1- and CUL4-associated factor 7                             |
| WNT11   | 75897369    | 75921780    | 11q13.5  | Protein Wnt-11                                                 |
| WNT2    | 116916685   | 116963343   | 7q31.2   | Protein Wnt-2                                                  |
| WNT5A   | 55499743    | 55523973    | 3p14.3   | Protein Wnt-5a                                                 |
| WNT7A   | 13857755    | 13921618    | 3p25.1   | Protein Wnt-7a                                                 |

|         |           |           |          |                                                        |
|---------|-----------|-----------|----------|--------------------------------------------------------|
| WNT9A   | 228106357 | 228135599 | 1q42.13  | Protein Wnt-9a                                         |
| WRNIP1  | 2765648   | 2787186   | 6p25.2   | ATPase WRNIP1                                          |
| WWOX    | 78133310  | 79246564  | 16q23.1  | WW domain-containing oxidoreductase                    |
| WWTR1   | 149235022 | 149454501 | 3q25.1   | WW domain-containing transcription regulator protein 1 |
| XAB1    | 27851114  | 27874375  | 2p23.3   | GPN-loop GTPase 1                                      |
| XAB2    | 7684411   | 7694451   | 19p13.2  | Pre-mRNA-splicing factor SYF1                          |
| XAGE2   | 52380351  | 52387001  | Xp11.22  | X antigen family member 2                              |
| XCL2    | 168510003 | 168513235 | 1q24.2   | Cytokine SCM-1 beta                                    |
| XLKD1   | 10578513  | 10633236  | 11p15.4  | Lymphatic vessel endothelial hyaluronan receptor 1     |
| XPA     | 100437191 | 100459639 | 9q22.33  | DNA repair protein complementing XP-A cells            |
| XRCC5   | 216972187 | 217071026 | 2q35     | X-ray repair cross-complementing protein 5             |
| YARS2   | 32880424  | 32908836  | 12p11.21 | Tyrosine-tRNA ligase, mitochondrial                    |
| YBX1    | 43148098  | 43168020  | 1p34.2   | Nuclease-sensitive element-binding protein 1           |
| YKT6    | 44240567  | 44253893  | 7p13     | Synaptobrevin homolog YKT6                             |
| YWHAG   | 75956116  | 75988348  | 7q11.23  | 14-3-3 protein gamma                                   |
| YWHAZ   | 101928753 | 101965616 | 8q22.3   | 14-3-3 protein zeta/delta                              |
| ZCCHC17 | 31769842  | 31837783  | 1p35.2   | Nucleolar protein of 40 kDa                            |
| ZDHHC4  | 6617065   | 6629005   | 7p22.1   | Probable palmitoyltransferase ZDHHC4                   |
| ZDHHC5  | 57435219  | 57468659  | 11q12.1  | Palmitoyltransferase ZDHHC5                            |
| ZDHHC7  | 85007787  | 85045141  | 16q24.1  | Palmitoyltransferase ZDHHC7                            |
| ZFAND3  | 37787275  | 38122400  | 6p21.2   | AN1-type zinc finger protein 3                         |
| ZFP36L2 | 43449541  | 43453748  | 2p21     | Zinc finger protein 36, C3H1 type-like 2               |
| ZMYND12 | 42896000  | 42921938  | 1p34.2   | Zinc finger MYND domain-containing protein 12          |
| ZMYND19 | 140476531 | 140484942 | 9q34.3   | Zinc finger MYND domain-containing protein 19          |
| ZNF350  | 52467596  | 52490109  | 19q13.41 | Zinc finger protein 350                                |
| ZNF426  | 9638667   | 9649303   | 19p13.2  | Zinc finger protein 426                                |
| ZNF461  | 37128094  | 37157755  | 19q13.12 | Zinc finger protein 461                                |
| ZNF496  | 247460714 | 247495148 | 1q44     | Zinc finger protein 496                                |
| ZNF559  | 9434448   | 9461838   | 19p13.2  | Zinc finger protein 559                                |
| ZNHIT1  | 100860949 | 100867471 | 7q22.1   | Zinc finger HIT domain-containing protein 1            |

**Table S2.** Positive aAb for EBNA spots (n=14) defined taking into account the normalization values (> mean of the normalized values of pCite spots + 3SD).

| Samples | Diagnostic      | Mean of normalized intensity data of EBNA spots | N° of EBNA spots > mean pCite+3SD |
|---------|-----------------|-------------------------------------------------|-----------------------------------|
| 51      | Healthy donor   | 1.33                                            | 4/14                              |
| 52      | Healthy donor   | 1.02                                            | 0/14                              |
| 53      | Healthy donor   | 0.73                                            | 2/14                              |
| 54      | Healthy donor   | 0.66                                            | 2/14                              |
| 55      | Healthy donor   | 0.70                                            | 0/14                              |
| 56      | Healthy donor   | 0.88                                            | 0/14                              |
| 57      | Healthy donor   | 1.16                                            | 1/14                              |
| 1       | Metastatic sCRC | 1.06                                            | 1/14                              |
| 2       | Metastatic sCRC | 3.74                                            | 5/14                              |
| 3       | Metastatic sCRC | 0.80                                            | 2/14                              |
| 4       | Metastatic sCRC | 3.42                                            | 1/14                              |
| 7       | Metastatic sCRC | 0.49                                            | 4/14                              |
| 13      | Metastatic sCRC | 0.65                                            | 0/14                              |
| 15      | Metastatic sCRC | 0.57                                            | 1/14                              |
| 16      | Metastatic sCRC | 0.36                                            | 0/14                              |
| 20      | Metastatic sCRC | 1.77                                            | 0/14                              |
| 25      | Metastatic sCRC | 0.57                                            | 0/14                              |
| 35      | Metastatic sCRC | 1.20                                            | 0/14                              |
| 45      | Metastatic sCRC | 0.73                                            | 1/14                              |

|    |                        |      |      |
|----|------------------------|------|------|
| 5  | Non-metastatic<br>sCRC | 2.30 | 1/14 |
| 6  | Non-metastatic<br>sCRC | 3.46 | 1/14 |
| 8  | Non-metastatic<br>sCRC | 1.25 | 2/14 |
| 9  | Non-metastatic<br>sCRC | 1.85 | 2/14 |
| 10 | Non-metastatic<br>sCRC | 0.15 | 0/14 |
| 11 | Non-metastatic<br>sCRC | 0.25 | 0/14 |
| 12 | Non-metastatic<br>sCRC | 0.88 | 3/14 |
| 14 | Non-metastatic<br>sCRC | 0.15 | 0/14 |
| 17 | Non-metastatic<br>sCRC | 0.22 | 4/14 |
| 18 | Non-metastatic<br>sCRC | 0.15 | 1/14 |
| 19 | Non-metastatic<br>sCRC | 1.36 | 0/14 |
| 21 | Non-metastatic<br>sCRC | 2.70 | 5/14 |
| 22 | Non-metastatic<br>sCRC | 0.73 | 4/14 |
| 23 | Non-metastatic<br>sCRC | 1.18 | 0/14 |
| 24 | Non-metastatic<br>sCRC | 1.50 | 4/14 |
| 26 | Non-metastatic<br>sCRC | 1.28 | 2/14 |
| 27 | Non-metastatic<br>sCRC | 1.72 | 0/14 |
| 28 | Non-metastatic<br>sCRC | 0.53 | 2/14 |
| 29 | Non-metastatic<br>sCRC | 2.29 | 0/14 |
| 30 | Non-metastatic<br>sCRC | 1.12 | 0/14 |
| 31 | Non-metastatic<br>sCRC | 1.24 | 3/14 |
| 32 | Non-metastatic<br>sCRC | 1.44 | 0/14 |
| 33 | Non-metastatic<br>sCRC | 1.57 | 2/14 |
| 34 | Non-metastatic<br>sCRC | 1.74 | 0/14 |
| 36 | Non-metastatic<br>sCRC | 1.71 | 0/14 |
| 37 | Non-metastatic<br>sCRC | 0.50 | 3/14 |
| 38 | Non-metastatic<br>sCRC | 1.17 | 0/14 |
| 39 | Non-metastatic<br>sCRC | 1.42 | 1/14 |
| 40 | Non-metastatic<br>sCRC | 1.32 | 1/14 |
| 41 | Non-metastatic<br>sCRC | 1.25 | 0/14 |
| 42 | Non-metastatic<br>sCRC | 0.32 | 0/14 |

|    |                     |      |      |
|----|---------------------|------|------|
| 43 | Non-metastatic sCRC | 1.88 | 1/14 |
| 44 | Non-metastatic sCRC | 1.64 | 0/14 |
| 46 | Non-metastatic sCRC | 0.93 | 0/14 |
| 47 | Non-metastatic sCRC | 1.09 | 0/14 |
| 48 | Non-metastatic sCRC | 0.43 | 0/14 |
| 49 | Non-metastatic sCRC | 1.44 | 0/14 |
| 50 | Non-metastatic sCRC | 0.44 | 0/14 |

**Table S3.** aAbs profile against TAAs that exhibited implication to discriminate healthy donors ( $n = 7$ ) vs. sCRC patients ( $n = 50$ ). None of these TAAs have been identified as positive aAb in healthy donors.

| TAA ID      | <i>p</i> -value (U-Mann-Withney) | N° sCRC ( $n = 50$ ) with aAb positive | Fold change (FC) |              |
|-------------|----------------------------------|----------------------------------------|------------------|--------------|
|             |                                  |                                        | Median FC sCRC   | % sCRC > FC1 |
| TEX11       | 0.0005                           | 8/50                                   | 2.6              | 90           |
| GORASP2     | 0.0007                           | 2/50                                   | 3.1              | 82           |
| C9orf80     | 0.0007                           | 3/50                                   | 3.9              | 92           |
| HMOX2       | 0.0008                           | 13/50                                  | 3.0              | 92           |
| KIF9        | 0.0008                           | 14/50                                  | 2.7              | 92           |
| ICAM2       | 0.0012                           | 16/50                                  | 2.4              | 94           |
| MARCKSL1    | 0.0012                           | 10/50                                  | 2.4              | 88           |
| RB1         | 0.0012                           | 2/50                                   | 2.6              | 92           |
| SPP1        | 0.0012                           | 3/50                                   | 2.8              | 86           |
| STC2        | 0.0013                           | 10/50                                  | 2.0              | 84           |
| BHMT2       | 0.0014                           | 10/50                                  | 2.2              | 86           |
| D21S2056E   | 0.0016                           | 10/50                                  | 2.2              | 84           |
| DLAT        | 0.0016                           | 2/50                                   | 2.3              | 86           |
| CKMT1B      | 0.0017                           | 27/50                                  | 2.6              | 86           |
| GTF2H1      | 0.0017                           | 8/50                                   | 2.3              | 82           |
| ALDOA       | 0.0019                           | 8/50                                   | 2.0              | 88           |
| COX11       | 0.0020                           | 14/50                                  | 2.4              | 88           |
| RPL11       | 0.0020                           | 2/50                                   | 2.4              | 86           |
| ASB3        | 0.0020                           | 8/50                                   | 2.3              | 84           |
| PRCP        | 0.0024                           | 21/50                                  | 1.9              | 86           |
| PDEF        | 0.0024                           | 10/50                                  | 2.2              | 86           |
| ANP32A      | 0.0024                           | 2/50                                   | 2.3              | 82           |
| GNAI3       | 0.0026                           | 5/50                                   | 2.5              | 86           |
| HBG1        | 0.0026                           | 2/50                                   | 3.5              | 84           |
| ARHI        | 0.0028                           | 11/50                                  | 1.9              | 86           |
| RCV1        | 0.0028                           | 3/50                                   | 2.9              | 86           |
| RAB8A       | 0.0028                           | 5/50                                   | 2.4              | 84           |
| GDEP        | 0.0030                           | 11/50                                  | 2.2              | 82           |
| PLAC1       | 0.0030                           | 7/50                                   | 2.0              | 84           |
| HSD17B3     | 0.0030                           | 2/50                                   | 2.3              | 80           |
| SH3BP1      | 0.0033                           | 3/50                                   | 2.0              | 84           |
| USP5        | 0.0033                           | 2/50                                   | 2.1              | 82           |
| TCEAL1      | 0.0033                           | 5/50                                   | 2.5              | 84           |
| KPNA6       | 0.0035                           | 18/50                                  | 2.3              | 84           |
| Progranulin | 0.0038                           | 4/50                                   | 1.8              | 86           |
| CHODL       | 0.0038                           | 4/50                                   | 2.2              | 86           |
| KCNE2       | 0.0041                           | 13/50                                  | 2.0              | 82           |
| SERPINA5    | 0.0041                           | 5/50                                   | 2.2              | 80           |
| SLCO4A1     | 0.0041                           | 4/50                                   | 2.5              | 80           |
| SDPR        | 0.0041                           | 10/50                                  | 1.8              | 86           |
| JUP         | 0.0041                           | 3/50                                   | 2.5              | 82           |
| FRK         | 0.0041                           | 6/50                                   | 2.1              | 84           |
| DDX39       | 0.0044                           | 2/50                                   | 2.1              | 80           |

---

|          |        |       |     |    |
|----------|--------|-------|-----|----|
| PSAP     | 0.0048 | 2/50  | 2.1 | 84 |
| SCARB1   | 0.0048 | 2/50  | 2.6 | 84 |
| AMY2A    | 0.0052 | 9/50  | 2.1 | 84 |
| BECN1    | 0.0056 | 16/50 | 2.0 | 84 |
| ST14     | 0.0056 | 16/50 | 1.7 | 80 |
| LDHB     | 0.0056 | 8/50  | 2.3 | 84 |
| SNX10    | 0.0056 | 2/50  | 2.1 | 82 |
| PSTPIP1  | 0.0060 | 17/50 | 2.1 | 84 |
| SLC6A1   | 0.0065 | 6/50  | 2.0 | 78 |
| HM13     | 0.0070 | 10/50 | 1.7 | 84 |
| RHOH     | 0.0070 | 7/50  | 1.9 | 82 |
| KIF22    | 0.0075 | 5/50  | 2.4 | 78 |
| SYTL1    | 0.0075 | 4/50  | 2.1 | 80 |
| Mage3    | 0.0075 | 10/50 | 1.9 | 82 |
| HIST1H3D | 0.0075 | 4/50  | 2.3 | 82 |
| RWDD1    | 0.0080 | 9/50  | 2.1 | 80 |
| RILP     | 0.0080 | 6/50  | 2.0 | 76 |
| RPL35    | 0.0080 | 4/50  | 1.9 | 82 |
| PLAGL1   | 0.0086 | 21/50 | 1.6 | 82 |
| DDX56    | 0.0086 | 9/50  | 1.7 | 84 |
| CTNNA1   | 0.0086 | 9/50  | 2.2 | 82 |
| BET1     | 0.0086 | 4/50  | 2.0 | 78 |
| HLA-DOB  | 0.0093 | 28/50 | 1.6 | 80 |
| HSPC047  | 0.0093 | 4/50  | 1.9 | 80 |
| PLEKHA8  | 0.0100 | 14/50 | 2.4 | 78 |
| ANXA9    | 0.0100 | 2/50  | 1.7 | 80 |
| GMD5     | 0.0100 | 7/50  | 1.7 | 84 |
| CNP      | 0.0100 | 13/50 | 1.8 | 82 |
| HSPA2    | 0.0100 | 2/50  | 2.2 | 76 |
| FSCN1    | 0.0100 | 4/50  | 2.2 | 80 |
| SERPING1 | 0.0107 | 5/50  | 2.2 | 80 |
| TNIP1    | 0.0107 | 22/50 | 1.7 | 84 |
| BCL2L13  | 0.0107 | 10/50 | 1.6 | 82 |
| COPS5    | 0.0115 | 2/50  | 1.9 | 76 |
| SKIP     | 0.0115 | 4/50  | 2.1 | 82 |
| MAGEA9   | 0.0123 | 6/50  | 1.8 | 84 |
| MGC26597 | 0.0131 | 16/50 | 1.8 | 80 |
| OR2C3    | 0.0131 | 16/50 | 2.3 | 78 |
| LOXL2    | 0.0131 | 6/50  | 2.1 | 80 |
| SNCB     | 0.0131 | 7/50  | 1.8 | 78 |
| SLC44A5  | 0.0131 | 4/50  | 1.8 | 80 |
| RPS28    | 0.0131 | 4/50  | 2.2 | 80 |
| PKNOX1   | 0.0141 | 13/50 | 1.6 | 80 |
| PITX3    | 0.0141 | 2/50  | 1.8 | 80 |
| C5AR1    | 0.0141 | 8/50  | 2.0 | 78 |
| FHIT     | 0.0150 | 17/50 | 1.7 | 74 |
| SND1     | 0.0150 | 6/50  | 1.7 | 80 |
| ECRG4    | 0.0150 | 3/50  | 1.8 | 78 |
| TCL1A    | 0.0161 | 20/50 | 1.6 | 80 |
| NUP54    | 0.0161 | 11/50 | 2.3 | 78 |
| SLC6A8   | 0.0161 | 16/50 | 1.9 | 76 |
| DRD2     | 0.0172 | 8/50  | 1.6 | 78 |
| FKRP     | 0.0172 | 6/50  | 1.6 | 78 |
| PEX10    | 0.0172 | 2/50  | 1.7 | 82 |
| COPB1    | 0.0172 | 3/50  | 1.8 | 78 |
| YBX1     | 0.0184 | 9/50  | 1.5 | 76 |
| NAT5     | 0.0184 | 15/50 | 1.7 | 76 |
| CBLB     | 0.0184 | 3/50  | 1.7 | 76 |
| SGTA     | 0.0196 | 6/50  | 1.6 | 76 |
| BBS2     | 0.0209 | 4/50  | 1.6 | 76 |
| CPSF1    | 0.0223 | 28/50 | 1.8 | 76 |
| UGDH     | 0.0223 | 22/50 | 1.9 | 74 |
| BGN      | 0.0223 | 10/50 | 1.6 | 76 |

|          |        |       |     |    |
|----------|--------|-------|-----|----|
| ARRB2    | 0.0238 | 8/50  | 1.5 | 82 |
| RPL18    | 0.0253 | 12/50 | 1.6 | 74 |
| RPS9     | 0.0253 | 11/50 | 1.7 | 76 |
| IFNGR2   | 0.0269 | 16/50 | 1.7 | 78 |
| ANXA13   | 0.0269 | 13/50 | 1.6 | 76 |
| OLR1     | 0.0269 | 7/50  | 1.9 | 70 |
| RSU1     | 0.0287 | 14/50 | 1.6 | 76 |
| LYZ      | 0.0287 | 8/50  | 1.5 | 74 |
| P2RY6    | 0.0305 | 6/50  | 1.6 | 76 |
| SAE1     | 0.0324 | 17/50 | 1.5 | 76 |
| EIF3S8   | 0.0324 | 16/50 | 1.7 | 74 |
| PENK     | 0.0324 | 15/50 | 1.7 | 72 |
| H3F3A    | 0.0324 | 4/50  | 1.5 | 76 |
| EBAG9    | 0.0324 | 2/50  | 1.9 | 70 |
| C21orf66 | 0.0344 | 13/50 | 1.6 | 74 |
| TSSK6    | 0.0344 | 11/50 | 1.6 | 74 |
| ALDH1A2  | 0.0344 | 13/50 | 1.6 | 76 |
| GNL1     | 0.0344 | 5/50  | 1.5 | 74 |
| TOLLIP   | 0.0344 | 3/50  | 1.7 | 74 |
| CXADR    | 0.0365 | 23/50 | 1.8 | 78 |
| LASP1    | 0.0388 | 5/50  | 1.7 | 74 |
| SERF2    | 0.0388 | 2/50  | 1.7 | 70 |
| RAB2B    | 0.0411 | 14/50 | 1.5 | 72 |
| ML-IAP   | 0.0411 | 8/50  | 1.5 | 76 |
| ASPSCR1  | 0.0411 | 9/50  | 1.6 | 72 |
| TEF      | 0.0436 | 12/50 | 1.7 | 76 |
| STUB1    | 0.0436 | 18/50 | 1.6 | 74 |
| VIL2     | 0.0436 | 8/50  | 2.1 | 72 |
| EFNB1    | 0.0436 | 6/50  | 1.6 | 74 |
| HPD      | 0.0436 | 3/50  | 1.9 | 72 |
| TPTE     | 0.0462 | 3/50  | 1.6 | 74 |
| KCTD14   | 0.0462 | 10/50 | 1.7 | 70 |
| TRPV2    | 0.0489 | 11/50 | 1.6 | 70 |
| C1orf62  | 0.0489 | 2/50  | 1.4 | 66 |
| EML1     | 0.0489 | 2/50  | 1.7 | 72 |

**Table S4.** aAbs profile against TAAs with statistical significance ( $p < 0.01$ ) that might distinguish metastatic sCRC ( $n = 12$ ) vs. Non-metastatic sCRC ( $n = 38$ ). None of these TAAs have been identified as positive aAb in healthy donors.

| TAA ID  | $p$ -value (U-Mann-<br>Withney) | N° metastatic<br>sCRC ( $n = 12$ ) with<br>aAb positive | N° No metastatic<br>sCRC ( $n = 38$ ) with<br>aAb positive | Fold change (FC) |                 |
|---------|---------------------------------|---------------------------------------------------------|------------------------------------------------------------|------------------|-----------------|
|         |                                 |                                                         |                                                            | Median<br>FC     | % sCRC ><br>FC1 |
| RPS28   | 0.0193                          | 0/12                                                    | 11/38                                                      | 0.7              | 42              |
| C9orf80 | 0.0327                          | 8/12                                                    | 5/38                                                       | 0.9              | 50              |
| OLR1    | 0.0387                          | 0/12                                                    | 18/38                                                      | 0.6              | 50              |
| FSCN1   | 0.0409                          | 0/12                                                    | 11/38                                                      | 0.8              | 42              |
| DLAT    | 0.0432                          | 0/12                                                    | 5/38                                                       | 0.9              | 50              |
| NUP54   | 0.0481                          | 8/12                                                    | 26/38                                                      | 0.8              | 33              |

**Table S5.** Results from leave-one-out validation when the lasso algorithm selects only one variable.

| Validation round | Protein selected | True positive | True negative | False positive | False negative |
|------------------|------------------|---------------|---------------|----------------|----------------|
| 1                | VTI_2            | 1             | 20            | 8              | 0              |
| 2                | VTI_2            | 0             | 18            | 10             | 1              |
| 3                | VTI_2            | 1             | 20            | 8              | 0              |
| 4                | VTI_2            | 1             | 16            | 12             | 0              |
| 5                | VTI_2            | 1             | 19            | 9              | 0              |
| 6                | GJB2_1           | 1             | 17            | 11             | 0              |
| 7                | VTI_2            | 1             | 18            | 10             | 0              |
| 8                | VTI_2            | 1             | 21            | 7              | 0              |
| 9                | CD151_1          | 1             | 15            | 13             | 0              |
| 10               | VTI_2            | 1             | 19            | 9              | 0              |
| 11               | VTI_2            | 1             | 19            | 9              | 0              |
| 12               | VTI_2            | 1             | 16            | 12             | 0              |

**Table S6.** Identified proteins as potential aAbs biomarker panels in sCRC that appear in <10% of agarose based immunoprecipitation registered experiments in CRAPome.

| User Input | Mapped Gene Symbol | Num of Expt. (found/total) | Ave SC | Max SC |
|------------|--------------------|----------------------------|--------|--------|
| DLAT       | DLAT               | 38/411                     | 6.5    | 24     |
| VTI1B      | VTI1B              | 2/411                      | 1      | 1      |
| P53        | TP53               | 52/411                     | 5.4    | 31     |
| NUP54      | NUP54              | 16/411                     | 2.1    | 7      |
| FSCN1      | FSCN1              | 42/411                     | 2.9    | 25     |
| RPS28      | RPS28              | 182/411                    | 2.5    | 16     |
| INIP       | INIP               | 1/411                      | 1      | 1      |
| OLR1       | OLR1               | 6/411                      | 1.3    | 3      |
